# Supplementary material
Source: publisher figshare collection journal article supplement (https://gsajournals.figshare.com/ndownloader/files/14094056)
Supplement: Supplementary file 1 [file 14094056]

uniqueRunID	worm	wormID	strain	reartemp	date	run	Droplet Temp (corrected)	TotalGoodFrames	Area	Fast Locomotion Index (LI1)	Min(Fast Locomotion Index)	Slow Locomotion Index (LI7)	Min(Slow Locomotion Index)	Paralyzed (=0, motile=1)
wormd20121119s88PB1237AF16rt23w04r00	3	AF16.1	AF16	23	11/19/12	0	25.03423265	284	398.824742	0.57618848	0.010663581	0.65084427	0.012037917	1
wormd20121119s88PB1237AF16rt23w04r01	3	AF16.1	AF16	23	11/19/12	1	26.09545714	133	395.014493	0.57723029	0.010663581	0.72621849	0.012037917	1
wormd20121119s88PB1237AF16rt23w04r02	3	AF16.1	AF16	23	11/19/12	2	27.15668163	146	319.100671	0.43014543	0.010663581	0.55606785	0.012037917	1
wormd20121119s88PB1237AF16rt23w04r03	3	AF16.1	AF16	23	11/19/12	3	28.21790612	144	389.390411	0.57969597	0.010663581	0.72835011	0.012037917	1
wormd20121119s88PB1237AF16rt23w04r04	3	AF16.1	AF16	23	11/19/12	4	29.27913061	206	380.575472	0.56661438	0.010663581	0.72902504	0.012037917	1
wormd20121119s88PB1237AF16rt23w04r05	3	AF16.1	AF16	23	11/19/12	5	30.3403551	204	277.909091	0.2937077	0.010663581	0.40891417	0.012037917	1
wormd20121119s88PB1237AF16rt23w04r06	3	AF16.1	AF16	23	11/19/12	6	31.40157959	200	127	0.01066358	0.010663581	0.01203792	0.012037917	0
wormd20121119s88PB1237AF16rt23w04r07	3	AF16.1	AF16	23	11/19/12	7	32.46280408	250	396.155642	0.52314273	0.010663581	0.71990134	0.012037917	1
wormd20121119s88PB1237AF16rt23w04r08	3	AF16.1	AF16	23	11/19/12	8	33.52402857	157	265.388889	0.02389032	0.010663581	0.05432594	0.012037917	0
wormd20121119s88PB1237AF16rt23w04r09	3	AF16.1	AF16	23	11/19/12	9	34.58525306	215	246.207207	0.05429675	0.010663581	0.12006726	0.012037917	0
wormd20121119s88PB1237AF16rt23w04r10	3	AF16.1	AF16	23	11/19/12	10	35.64647755	293	427.766667	0.06403264	0.010663581	0.10839605	0.012037917	0
wormd20121119s88PB1237AF16rt23w04r11	3	AF16.1	AF16	23	11/19/12	11	36.70770204	293	423.71	0.05776277	0.010663581	0.05876887	0.012037917	0
wormd20121119s88PB1237AF16rt23w04r12	3	AF16.1	AF16	23	11/19/12	12	37.76892653	293	421.576667	0.06191853	0.010663581	0.06331722	0.012037917	0
wormd20121119s88PB1237AF16rt23w04r13	3	AF16.1	AF16	23	11/19/12	13	38.83015102	293	415.26	0.05502283	0.010663581	0.05572437	0.012037917	0
wormd20121119s88PB1237AF16rt23w04r14	3	AF16.1	AF16	23	11/19/12	14	39.89137551	293	401.403333	0.05483596	0.010663581	0.05465599	0.012037917	0
wormd20121119s88PB1237AF16rt23w04r15	3	AF16.1	AF16	23	11/19/12	15	40.9526	293	397.303333	0.0642831	0.010663581	0.0637798	0.012037917	0
wormd20121119s88PB1237AF16rt23w05r00	4	AF16.2	AF16	23	11/19/12	0	25.03423265	293	394.246667	0.63767877	0.069745879	0.72582303	0.071527721	1
wormd20121119s88PB1237AF16rt23w05r01	4	AF16.2	AF16	23	11/19/12	1	26.09545714	291	376.851852	0.65118291	0.069745879	0.7653168	0.071527721	1
wormd20121119s88PB1237AF16rt23w05r02	4	AF16.2	AF16	23	11/19/12	2	27.15668163	271	431.359712	0.56808493	0.069745879	0.69397255	0.071527721	1
wormd20121119s88PB1237AF16rt23w05r03	4	AF16.2	AF16	23	11/19/12	3	28.21790612	195	381.969543	0.66000809	0.069745879	0.77863684	0.071527721	1
wormd20121119s88PB1237AF16rt23w05r04	4	AF16.2	AF16	23	11/19/12	4	29.27913061	213	382.865116	0.59976955	0.069745879	0.7681875	0.071527721	1
wormd20121119s88PB1237AF16rt23w05r05	4	AF16.2	AF16	23	11/19/12	5	30.3403551	170	472.163842	0.55185338	0.069745879	0.69384398	0.071527721	1
wormd20121119s88PB1237AF16rt23w05r06	4	AF16.2	AF16	23	11/19/12	6	31.40157959	176	395.73224	0.60543543	0.069745879	0.7539905	0.071527721	1
wormd20121119s88PB1237AF16rt23w05r07	4	AF16.2	AF16	23	11/19/12	7	32.46280408	194	378.312821	0.46942529	0.069745879	0.67638257	0.071527721	1
wormd20121119s88PB1237AF16rt23w05r08	4	AF16.2	AF16	23	11/19/12	8	33.52402857	101	336.432692	0.08898314	0.069745879	0.23976022	0.071527721	1
wormd20121119s88PB1237AF16rt23w05r09	4	AF16.2	AF16	23	11/19/12	9	34.58525306	221	323.083333	0.41654817	0.069745879	0.6125271	0.071527721	1
wormd20121119s88PB1237AF16rt23w05r10	4	AF16.2	AF16	23	11/19/12	10	35.64647755	293	378.213333	0.22000532	0.069745879	0.49507255	0.071527721	1
wormd20121119s88PB1237AF16rt23w05r11	4	AF16.2	AF16	23	11/19/12	11	36.70770204	293	359	0.06977793	0.069745879	0.07152772	0.071527721	0
wormd20121119s88PB1237AF16rt23w05r12	4	AF16.2	AF16	23	11/19/12	12	37.76892653	293	353.573333	0.07212213	0.069745879	0.07279106	0.071527721	0
wormd20121119s88PB1237AF16rt23w05r13	4	AF16.2	AF16	23	11/19/12	13	38.83015102	293	357.57	0.06974588	0.069745879	0.072282	0.071527721	0
wormd20121119s88PB1237AF16rt23w05r14	4	AF16.2	AF16	23	11/19/12	14	39.89137551	293	369.346667	0.07546465	0.069745879	0.07518397	0.071527721	0
wormd20121119s88PB1237AF16rt23w05r15	4	AF16.2	AF16	23	11/19/12	15	40.9526	293	381.966667	0.08297367	0.069745879	0.08224346	0.071527721	0
wormd20121119s88PB1237AF16rt23w06r00	5	AF16.3	AF16	23	11/19/12	0	25.03423265	259	249.56015	0.65388372	0.045356026	0.7474216	0.049394935	1
wormd20121119s88PB1237AF16rt23w06r01	5	AF16.3	AF16	23	11/19/12	1	26.09545714	234	206.443983	0.61095236	0.045356026	0.76528715	0.049394935	1
wormd20121119s88PB1237AF16rt23w06r02	5	AF16.3	AF16	23	11/19/12	2	27.15668163	239	299.174797	0.62111481	0.045356026	0.67384656	0.049394935	1
wormd20121119s88PB1237AF16rt23w06r03	5	AF16.3	AF16	23	11/19/12	3	28.21790612	218	259.048889	0.6944504	0.045356026	0.78368541	0.049394935	1
wormd20121119s88PB1237AF16rt23w06r04	5	AF16.3	AF16	23	11/19/12	4	29.27913061	273	243.725	0.57179566	0.045356026	0.74900836	0.049394935	1
wormd20121119s88PB1237AF16rt23w06r05	5	AF16.3	AF16	23	11/19/12	5	30.3403551	200	243.758454	0.64144363	0.045356026	0.75509706	0.049394935	1
wormd20121119s88PB1237AF16rt23w06r06	5	AF16.3	AF16	23	11/19/12	6	31.40157959	212	279.269406	0.5818237	0.045356026	0.66444028	0.049394935	1
wormd20121119s88PB1237AF16rt23w06r07	5	AF16.3	AF16	23	11/19/12	7	32.46280408	246	229.919679	0.59102838	0.045356026	0.77301064	0.049394935	1
wormd20121119s88PB1237AF16rt23w06r08	5	AF16.3	AF16	23	11/19/12	8	33.52402857	167	195.774566	0.41477257	0.045356026	0.74811096	0.049394935	1
wormd20121119s88PB1237AF16rt23w06r09	5	AF16.3	AF16	23	11/19/12	9	34.58525306	153	236.99375	0.26262752	0.045356026	0.51249443	0.049394935	1
wormd20121119s88PB1237AF16rt23w06r10	5	AF16.3	AF16	23	11/19/12	10	35.64647755	161	177.875	0.30976062	0.045356026	0.73251617	0.049394935	1
wormd20121119s88PB1237AF16rt23w06r11	5	AF16.3	AF16	23	11/19/12	11	36.70770204	254	158.127413	0.07941291	0.045356026	0.09503444	0.049394935	0
wormd20121119s88PB1237AF16rt23w06r12	5	AF16.3	AF16	23	11/19/12	12	37.76892653	169	111.431818	0.12967113	0.045356026	0.14247203	0.049394935	1
wormd20121119s88PB1237AF16rt23w06r13	5	AF16.3	AF16	23	11/19/12	13	38.83015102	201	65.8695652	0.04535603	0.045356026	0.04939493	0.049394935	0
wormd20121119s88PB1237AF16rt23w06r14	5	AF16.3	AF16	23	11/19/12	14	39.89137551	170	68.5086705	0.05365629	0.045356026	0.0874348	0.049394935	0
wormd20121119s88PB1237AF16rt23w06r15	5	AF16.3	AF16	23	11/19/12	15	40.9526	214	67.4840183	0.05092586	0.045356026	0.05677477	0.049394935	0
wormd20121119s88PB1237AF16rt23w10r00	9	AF16.4	AF16	23	11/19/12	0	25.03423265	262	487.271375	0.47511257	0.059621618	0.59523958	0.060624739	1
wormd20121119s88PB1237AF16rt23w10r01	9	AF16.4	AF16	23	11/19/12	1	26.09545714	208	470.141509	0.45541149	0.059621618	0.62578655	0.060624739	1
wormd20121119s88PB1237AF16rt23w10r02	9	AF16.4	AF16	23	11/19/12	2	27.15668163	249	482.164063	0.5252289	0.059621618	0.68910241	0.060624739	1
wormd20121119s88PB1237AF16rt23w10r03	9	AF16.4	AF16	23	11/19/12	3	28.21790612	111	488.752137	0.4067475	0.059621618	0.4968307	0.060624739	1
wormd20121119s88PB1237AF16rt23w10r05	9	AF16.4	AF16	23	11/19/12	5	30.3403551	219	560.896104	0.4278896	0.059621618	0.61269738	0.060624739	1
wormd20121119s88PB1237AF16rt23w10r06	9	AF16.4	AF16	23	11/19/12	6	31.40157959	105	459.553571	0.44556834	0.059621618	0.60619923	0.060624739	1
wormd20121119s88PB1237AF16rt23w10r07	9	AF16.4	AF16	23	11/19/12	7	32.46280408	220	464.106195	0.09282293	0.059621618	0.28515044	0.060624739	1
wormd20121119s88PB1237AF16rt23w10r08	9	AF16.4	AF16	23	11/19/12	8	33.52402857	293	510.136667	0.05962162	0.059621618	0.06062474	0.060624739	0
wormd20121119s88PB1237AF16rt23w10r09	9	AF16.4	AF16	23	11/19/12	9	34.58525306	293	507.963333	0.06079521	0.059621618	0.06150356	0.060624739	0
wormd20121119s88PB1237AF16rt23w10r10	9	AF16.4	AF16	23	11/19/12	10	35.64647755	293	512.416667	0.06138287	0.059621618	0.0624009	0.060624739	0
wormd20121119s88PB1237AF16rt23w10r11	9	AF16.4	AF16	23	11/19/12	11	36.70770204	293	503.726667	0.06175757	0.059621618	0.06273236	0.060624739	0
wormd20121119s88PB1237AF16rt23w10r12	9	AF16.4	AF16	23	11/19/12	12	37.76892653	293	491.1	0.0624224	0.059621618	0.06284004	0.060624739	0
wormd20121119s88PB1237AF16rt23w10r13	9	AF16.4	AF16	23	11/19/12	13	38.83015102	293	457.933333	0.0598795	0.059621618	0.06100792	0.060624739	0
wormd20121119s88PB1237AF16rt23w10r14	9	AF16.4	AF16	23	11/19/12	14	39.89137551	293	447.363333	0.06464538	0.059621618	0.06466187	0.060624739	0
wormd20121119s88PB1237AF16rt23w10r15	9	AF16.4	AF16	23	11/19/12	15	40.9526	293	442.49	0.0676149	0.059621618	0.06873712	0.060624739	0
wormd20121119s88PB1237AF16rt23w11r00	10	AF16.5	AF16	23	11/19/12	0	25.03423265	185	405.427083	0.53966464	0.059926416	0.62397899	0.060258108	1
wormd20121119s88PB1237AF16rt23w11r01	10	AF16.5	AF16	23	11/19/12	1	26.09545714	207	382.783019	0.58809627	0.059926416	0.66776965	0.060258108	1
wormd20121119s88PB1237AF16rt23w11r02	10	AF16.5	AF16	23	11/19/12	2	27.15668163	184	382.848168	0.45498119	0.059926416	0.73339485	0.060258108	1
wormd20121119s88PB1237AF16rt23w11r03	10	AF16.5	AF16	23	11/19/12	3	28.21790612	204	367.161137	0.65648848	0.059926416	0.73734354	0.060258108	1
wormd20121119s88PB1237AF16rt23w11r04	10	AF16.5	AF16	23	11/19/12	4	29.27913061	111	319.652174	0.33131163	0.059926416	0.44252455	0.060258108	1
wormd20121119s88PB1237AF16rt23w11r05	10	AF16.5	AF16	23	11/19/12	5	30.3403551	182	385.636364	0.57499125	0.059926416	0.67381231	0.060258108	1
wormd20121119s88PB1237AF16rt23w11r06	10	AF16.5	AF16	23	11/19/12	6	31.40157959	189	353.530928	0.44197606	0.059926416	0.71334528	0.060258108	1
wormd20121119s88PB1237AF16rt23w11r07	10	AF16.5	AF16	23	11/19/12	7	32.46280408	224	413.445415	0.3998324	0.059926416	0.68892987	0.060258108	1
wormd20121119s88PB1237AF16rt23w11r10	10	AF16.5	AF16	23	11/19/12	10	35.64647755	111	181.641026	0.09582036	0.059926416	0.11200893	0.060258108	0
wormd20121119s88PB1237AF16rt23w11r12	10	AF16.5	AF16	23	11/19/12	12	37.76892653	134	368.385714	0.05992642	0.059926416	0.06025811	0.060258108	0
wormd20121119s88PB1237AF16rt23w11r13	10	AF16.5	AF16	23	11/19/12	13	38.83015102	194	355.925373	0.069872	0.059926416	0.07218915	0.060258108	0
wormd20121119s88PB1237AF16rt23w11r14	10	AF16.5	AF16	23	11/19/12	14	39.89137551	214	360.543379	0.08934599	0.059926416	0.09726555	0.060258108	0
wormd20121119s88PB1237AF16rt23w11r15	10	AF16.5	AF16	23	11/19/12	15	40.9526	179	337.177419	0.08159705	0.059926416	0.08547146	0.060258108	0
wormd20121119s88PB1237AF16rt23w12r00	11	AF16.6	AF16	23	11/19/12	0	25.03423265	193	389.447236	0.58539743	0.15666963	0.64143061	0.377110485	1
wormd20121119s88PB1237AF16rt23w12r01	11	AF16.6	AF16	23	11/19/12	1	26.09545714	291	361.302013	0.61446452	0.15666963	0.76617412	0.377110485	1
wormd20121119s88PB1237AF16rt23w12r02	11	AF16.6	AF16	23	11/19/12	2	27.15668163	255	432.576923	0.57633632	0.15666963	0.74945647	0.377110485	1
wormd20121119s88PB1237AF16rt23w12r03	11	AF16.6	AF16	23	11/19/12	3	28.21790612	281	405.878472	0.64184657	0.15666963	0.79814731	0.377110485	1
wormd20121119s88PB1237AF16rt23w12r04	11	AF16.6	AF16	23	11/19/12	4	29.27913061	291	383.66443	0.65980679	0.15666963	0.78216165	0.377110485	1
wormd20121119s88PB1237AF16rt23w12r05	11	AF16.6	AF16	23	11/19/12	5	30.3403551	293	412.736667	0.62221869	0.15666963	0.74665156	0.377110485	1
wormd20121119s88PB1237AF16rt23w12r06	11	AF16.6	AF16	23	11/19/12	6	31.40157959	286	409.65529	0.52748042	0.15666963	0.74206161	0.377110485	1
wormd20121119s88PB1237AF16rt23w12r08	11	AF16.6	AF16	23	11/19/12	8	33.52402857	236	357.570248	0.56681724	0.15666963	0.77012233	0.377110485	1
wormd20121119s88PB1237AF16rt23w12r10	11	AF16.6	AF16	23	11/19/12	10	35.64647755	124	405.217054	0.15666963	0.15666963	0.37711049	0.377110485	1
wormd20121119s88PB1237AF16rt23w16r00	15	AF16.7	AF16	23	11/19/12	0	25.03423265	290	482.993266	0.59855351	0.068337548	0.61276157	0.06917815	1
wormd20121119s88PB1237AF16rt23w16r01	15	AF16.7	AF16	23	11/19/12	1	26.09545714	287	490.35034	0.51147542	0.068337548	0.68166865	0.06917815	1
wormd20121119s88PB1237AF16rt23w16r02	15	AF16.7	AF16	23	11/19/12	2	27.15668163	290	487.205387	0.62522469	0.068337548	0.73497512	0.06917815	1
wormd20121119s88PB1237AF16rt23w16r04	15	AF16.7	AF16	23	11/19/12	4	29.27913061	284	489.852234	0.5945391	0.068337548	0.7309158	0.06917815	1
wormd20121119s88PB1237AF16rt23w16r05	15	AF16.7	AF16	23	11/19/12	5	30.3403551	231	508.241525	0.47538046	0.068337548	0.65347408	0.06917815	1
wormd20121119s88PB1237AF16rt23w16r06	15	AF16.7	AF16	23	11/19/12	6	31.40157959	283	481.982759	0.4986472	0.068337548	0.69986949	0.06917815	1
wormd20121119s88PB1237AF16rt23w16r07	15	AF16.7	AF16	23	11/19/12	7	32.46280408	122	526.739837	0.50963463	0.068337548	0.67247717	0.06917815	1
wormd20121119s88PB1237AF16rt23w16r09	15	AF16.7	AF16	23	11/19/12	9	34.58525306	293	480.086667	0.28166175	0.068337548	0.5140882	0.06917815	1
wormd20121119s88PB1237AF16rt23w16r10	15	AF16.7	AF16	23	11/19/12	10	35.64647755	277	470.183099	0.06913062	0.068337548	0.12119591	0.06917815	0
wormd20121119s88PB1237AF16rt23w16r11	15	AF16.7	AF16	23	11/19/12	11	36.70770204	293	460.386667	0.07525208	0.068337548	0.14410986	0.06917815	1
wormd20121119s88PB1237AF16rt23w16r12	15	AF16.7	AF16	23	11/19/12	12	37.76892653	284	437.728522	0.0686047	0.068337548	0.07231223	0.06917815	0
wormd20121119s88PB1237AF16rt23w16r13	15	AF16.7	AF16	23	11/19/12	13	38.83015102	293	424.56	0.07376222	0.068337548	0.07709865	0.06917815	0
wormd20121119s88PB1237AF16rt23w16r14	15	AF16.7	AF16	23	11/19/12	14	39.89137551	293	477.676667	0.06833755	0.068337548	0.06917815	0.06917815	0
wormd20121119s88PB1237AF16rt23w16r15	15	AF16.7	AF16	23	11/19/12	15	40.9526	293	466.666667	0.07019747	0.068337548	0.07235845	0.06917815	0
wormd20121119s88PB1237AF16rt23w17r00	16	AF16.8	AF16	23	11/19/12	0	25.03423265	154	352.25625	0.56788441	0.066665531	0.65214492	0.066645416	1
wormd20121119s88PB1237AF16rt23w17r01	16	AF16.8	AF16	23	11/19/12	1	26.09545714	188	317.482051	0.55311226	0.066665531	0.65676694	0.066645416	1
wormd20121119s88PB1237AF16rt23w17r02	16	AF16.8	AF16	23	11/19/12	2	27.15668163	234	327.136929	0.62693285	0.066665531	0.75165372	0.066645416	1
wormd20121119s88PB1237AF16rt23w17r03	16	AF16.8	AF16	23	11/19/12	3	28.21790612	143	374.394558	0.44378502	0.066665531	0.72840124	0.066645416	1
wormd20121119s88PB1237AF16rt23w17r06	16	AF16.8	AF16	23	11/19/12	6	31.40157959	132	360.892086	0.48839965	0.066665531	0.74699001	0.066645416	1
wormd20121119s88PB1237AF16rt23w17r07	16	AF16.8	AF16	23	11/19/12	7	32.46280408	129	372.907692	0.46706011	0.066665531	0.74980635	0.066645416	1
wormd20121119s88PB1237AF16rt23w17r08	16	AF16.8	AF16	23	11/19/12	8	33.52402857	227	311.209402	0.46296179	0.066665531	0.78001778	0.066645416	1
wormd20121119s88PB1237AF16rt23w17r09	16	AF16.8	AF16	23	11/19/12	9	34.58525306	140	295.675862	0.07316587	0.066665531	0.09035423	0.066645416	0
wormd20121119s88PB1237AF16rt23w17r10	16	AF16.8	AF16	23	11/19/12	10	35.64647755	160	300.418182	0.07866853	0.066665531	0.11711525	0.066645416	0
wormd20121119s88PB1237AF16rt23w17r11	16	AF16.8	AF16	23	11/19/12	11	36.70770204	200	317.014706	0.06846625	0.066665531	0.06906688	0.066645416	0
wormd20121119s88PB1237AF16rt23w17r12	16	AF16.8	AF16	23	11/19/12	12	37.76892653	174	306.683333	0.06666553	0.066665531	0.06664542	0.066645416	0
wormd20121119s88PB1237AF16rt23w17r13	16	AF16.8	AF16	23	11/19/12	13	38.83015102	127	298.708955	0.06945197	0.066665531	0.07018701	0.066645416	0
wormd20121119s88PB1237AF16rt23w17r15	16	AF16.8	AF16	23	11/19/12	15	40.9526	105	211.153153	0.09671892	0.066665531	0.1083394	0.066645416	0
wormd20121119s88PB1237AF16rt23w18r00	17	AF16.9	AF16	23	11/19/12	0	25.03423265	292	421.822742	0.55139532	0.081770062	0.62645068	0.083480893	1
wormd20121119s88PB1237AF16rt23w18r01	17	AF16.9	AF16	23	11/19/12	1	26.09545714	288	360.332203	0.58708245	0.081770062	0.7158377	0.083480893	1
wormd20121119s88PB1237AF16rt23w18r02	17	AF16.9	AF16	23	11/19/12	2	27.15668163	293	442	0.57579562	0.081770062	0.70977001	0.083480893	1
wormd20121119s88PB1237AF16rt23w18r03	17	AF16.9	AF16	23	11/19/12	3	28.21790612	147	433.335526	0.4948288	0.081770062	0.63287205	0.083480893	1
wormd20121119s88PB1237AF16rt23w18r04	17	AF16.9	AF16	23	11/19/12	4	29.27913061	291	377.741611	0.53909657	0.081770062	0.73080899	0.083480893	1
wormd20121119s88PB1237AF16rt23w18r05	17	AF16.9	AF16	23	11/19/12	5	30.3403551	293	402.073333	0.34833854	0.081770062	0.7042381	0.083480893	1
wormd20121119s88PB1237AF16rt23w18r06	17	AF16.9	AF16	23	11/19/12	6	31.40157959	126	461.03937	0.32570323	0.081770062	0.55476511	0.083480893	1
wormd20121119s88PB1237AF16rt23w18r07	17	AF16.9	AF16	23	11/19/12	7	32.46280408	292	451.862876	0.4415355	0.081770062	0.68730076	0.083480893	1
wormd20121119s88PB1237AF16rt23w18r08	17	AF16.9	AF16	23	11/19/12	8	33.52402857	292	470.438127	0.40742379	0.081770062	0.73450934	0.083480893	1
wormd20121119s88PB1237AF16rt23w18r09	17	AF16.9	AF16	23	11/19/12	9	34.58525306	293	326.21	0.08177006	0.081770062	0.08348089	0.083480893	0
wormd20121119s88PB1237AF16rt23w18r10	17	AF16.9	AF16	23	11/19/12	10	35.64647755	293	360.99	0.09537617	0.081770062	0.1197616	0.083480893	0
wormd20121119s88PB1237AF16rt23w18r11	17	AF16.9	AF16	23	11/19/12	11	36.70770204	293	396.013333	0.11741449	0.081770062	0.14402687	0.083480893	1
wormd20121119s88PB1237AF16rt23w18r12	17	AF16.9	AF16	23	11/19/12	12	37.76892653	285	458.106164	0.11634569	0.081770062	0.12589543	0.083480893	0
wormd20121119s88PB1237AF16rt23w18r13	17	AF16.9	AF16	23	11/19/12	13	38.83015102	287	459.97619	0.13116543	0.081770062	0.131488	0.083480893	0
wormd20121119s88PB1237AF16rt23w18r14	17	AF16.9	AF16	23	11/19/12	14	39.89137551	293	423.14	0.0992032	0.081770062	0.09927876	0.083480893	0
wormd20121120s98AF16PB1167rt23w01r00	0	AF16.10	AF16	23	11/20/12	0	25.03423265	289	352.226351	0.55285877	0.054074344	0.64718003	0.054640019	1
wormd20121120s98AF16PB1167rt23w01r01	0	AF16.10	AF16	23	11/20/12	1	26.09545714	292	349.454849	0.6647238	0.054074344	0.72068134	0.054640019	1
wormd20121120s98AF16PB1167rt23w01r02	0	AF16.10	AF16	23	11/20/12	2	27.15668163	293	361.67	0.61436527	0.054074344	0.74314818	0.054640019	1
wormd20121120s98AF16PB1167rt23w01r03	0	AF16.10	AF16	23	11/20/12	3	28.21790612	292	391.979933	0.63013738	0.054074344	0.76478471	0.054640019	1
wormd20121120s98AF16PB1167rt23w01r04	0	AF16.10	AF16	23	11/20/12	4	29.27913061	291	342.338926	0.63655823	0.054074344	0.78893349	0.054640019	1
wormd20121120s98AF16PB1167rt23w01r05	0	AF16.10	AF16	23	11/20/12	5	30.3403551	293	413.666667	0.63664692	0.054074344	0.78501123	0.054640019	1
wormd20121120s98AF16PB1167rt23w01r06	0	AF16.10	AF16	23	11/20/12	6	31.40157959	293	411.786667	0.61403666	0.054074344	0.78269386	0.054640019	1
wormd20121120s98AF16PB1167rt23w01r07	0	AF16.10	AF16	23	11/20/12	7	32.46280408	293	364.913333	0.58800061	0.054074344	0.77677209	0.054640019	1
wormd20121120s98AF16PB1167rt23w01r08	0	AF16.10	AF16	23	11/20/12	8	33.52402857	293	392.876667	0.56300489	0.054074344	0.76715537	0.054640019	1
wormd20121120s98AF16PB1167rt23w01r09	0	AF16.10	AF16	23	11/20/12	9	34.58525306	293	353.603333	0.07334539	0.054074344	0.08064534	0.054640019	0
wormd20121120s98AF16PB1167rt23w01r10	0	AF16.10	AF16	23	11/20/12	10	35.64647755	293	361.246667	0.06699841	0.054074344	0.10811473	0.054640019	0
wormd20121120s98AF16PB1167rt23w01r11	0	AF16.10	AF16	23	11/20/12	11	36.70770204	285	353.702055	0.06394586	0.054074344	0.08657677	0.054640019	0
wormd20121120s98AF16PB1167rt23w01r12	0	AF16.10	AF16	23	11/20/12	12	37.76892653	293	344.766667	0.06216195	0.054074344	0.06501416	0.054640019	0
wormd20121120s98AF16PB1167rt23w01r13	0	AF16.10	AF16	23	11/20/12	13	38.83015102	293	347.223333	0.05407434	0.054074344	0.05464002	0.054640019	0
wormd20121120s98AF16PB1167rt23w01r14	0	AF16.10	AF16	23	11/20/12	14	39.89137551	293	348.343333	0.05981382	0.054074344	0.06080351	0.054640019	0
wormd20121120s98AF16PB1167rt23w01r15	0	AF16.10	AF16	23	11/20/12	15	40.9526	293	345.48	0.0611867	0.054074344	0.06296083	0.054640019	0
wormd20121120s98AF16PB1167rt23w02r00	1	AF16.11	AF16	23	11/20/12	0	25.03423265	293	293.086667	0.55894865	0.093666086	0.59835579	0.094258619	1
wormd20121120s98AF16PB1167rt23w02r01	1	AF16.11	AF16	23	11/20/12	1	26.09545714	240	294.510204	0.6277404	0.093666086	0.65698535	0.094258619	1
wormd20121120s98AF16PB1167rt23w02r02	1	AF16.11	AF16	23	11/20/12	2	27.15668163	236	279.193416	0.65528263	0.093666086	0.72854194	0.094258619	1
wormd20121120s98AF16PB1167rt23w02r03	1	AF16.11	AF16	23	11/20/12	3	28.21790612	270	258.301818	0.71884208	0.093666086	0.78104562	0.094258619	1
wormd20121120s98AF16PB1167rt23w02r04	1	AF16.11	AF16	23	11/20/12	4	29.27913061	207	293.233645	0.64414786	0.093666086	0.70663246	0.094258619	1
wormd20121120s98AF16PB1167rt23w02r05	1	AF16.11	AF16	23	11/20/12	5	30.3403551	277	256.528169	0.70096544	0.093666086	0.7668716	0.094258619	1
wormd20121120s98AF16PB1167rt23w02r06	1	AF16.11	AF16	23	11/20/12	6	31.40157959	228	259.49569	0.67003909	0.093666086	0.76230185	0.094258619	1
wormd20121120s98AF16PB1167rt23w02r07	1	AF16.11	AF16	23	11/20/12	7	32.46280408	235	310.295359	0.5659506	0.093666086	0.68742303	0.094258619	1
wormd20121120s98AF16PB1167rt23w02r08	1	AF16.11	AF16	23	11/20/12	8	33.52402857	293	232.563333	0.11912664	0.093666086	0.14744755	0.094258619	1
wormd20121120s98AF16PB1167rt23w02r09	1	AF16.11	AF16	23	11/20/12	9	34.58525306	216	311.372197	0.42842288	0.093666086	0.65330693	0.094258619	1
wormd20121120s98AF16PB1167rt23w02r10	1	AF16.11	AF16	23	11/20/12	10	35.64647755	293	231.526667	0.10237053	0.093666086	0.18993707	0.094258619	1
wormd20121120s98AF16PB1167rt23w02r11	1	AF16.11	AF16	23	11/20/12	11	36.70770204	293	258.073333	0.10381875	0.093666086	0.28205161	0.094258619	1
wormd20121120s98AF16PB1167rt23w02r12	1	AF16.11	AF16	23	11/20/12	12	37.76892653	293	249.163333	0.11572478	0.093666086	0.20742993	0.094258619	1
wormd20121120s98AF16PB1167rt23w02r13	1	AF16.11	AF16	23	11/20/12	13	38.83015102	293	231.726667	0.09988685	0.093666086	0.10373452	0.094258619	0
wormd20121120s98AF16PB1167rt23w02r14	1	AF16.11	AF16	23	11/20/12	14	39.89137551	293	233.793333	0.11954327	0.093666086	0.11950919	0.094258619	0
wormd20121120s98AF16PB1167rt23w02r15	1	AF16.11	AF16	23	11/20/12	15	40.9526	293	248.06	0.09366609	0.093666086	0.09425862	0.094258619	0
wormd20121120s98AF16PB1167rt23w03r00	2	AF16.12	AF16	23	11/20/12	0	25.03423265	290	420.76431	0.52556997	0.06895527	0.5883987	0.069204023	1
wormd20121120s98AF16PB1167rt23w03r01	2	AF16.12	AF16	23	11/20/12	1	26.09545714	276	435.328571	0.56388426	0.06895527	0.61015787	0.069204023	1
wormd20121120s98AF16PB1167rt23w03r02	2	AF16.12	AF16	23	11/20/12	2	27.15668163	208	425.292453	0.60365799	0.06895527	0.71771482	0.069204023	1
wormd20121120s98AF16PB1167rt23w03r03	2	AF16.12	AF16	23	11/20/12	3	28.21790612	234	450.639004	0.60711376	0.06895527	0.73315435	0.069204023	1
wormd20121120s98AF16PB1167rt23w03r04	2	AF16.12	AF16	23	11/20/12	4	29.27913061	230	436.223629	0.64778496	0.06895527	0.79563193	0.069204023	1
wormd20121120s98AF16PB1167rt23w03r05	2	AF16.12	AF16	23	11/20/12	5	30.3403551	273	427.875	0.60137051	0.06895527	0.7622286	0.069204023	1
wormd20121120s98AF16PB1167rt23w03r06	2	AF16.12	AF16	23	11/20/12	6	31.40157959	222	437.570175	0.62241847	0.06895527	0.77669769	0.069204023	1
wormd20121120s98AF16PB1167rt23w03r07	2	AF16.12	AF16	23	11/20/12	7	32.46280408	245	453.107143	0.57571719	0.06895527	0.74106702	0.069204023	1
wormd20121120s98AF16PB1167rt23w03r08	2	AF16.12	AF16	23	11/20/12	8	33.52402857	268	423.981818	0.37573496	0.06895527	0.61723227	0.069204023	1
wormd20121120s98AF16PB1167rt23w03r09	2	AF16.12	AF16	23	11/20/12	9	34.58525306	224	415.162281	0.28692687	0.06895527	0.58810079	0.069204023	1
wormd20121120s98AF16PB1167rt23w03r10	2	AF16.12	AF16	23	11/20/12	10	35.64647755	293	469.88	0.12688598	0.06895527	0.51475374	0.069204023	1
wormd20121120s98AF16PB1167rt23w03r11	2	AF16.12	AF16	23	11/20/12	11	36.70770204	293	465.266667	0.09246901	0.06895527	0.10319067	0.069204023	0
wormd20121120s98AF16PB1167rt23w03r12	2	AF16.12	AF16	23	11/20/12	12	37.76892653	293	446.726667	0.09849344	0.06895527	0.11383837	0.069204023	0
wormd20121120s98AF16PB1167rt23w03r13	2	AF16.12	AF16	23	11/20/12	13	38.83015102	245	499.123506	0.10452291	0.06895527	0.11336045	0.069204023	0
wormd20121120s98AF16PB1167rt23w03r14	2	AF16.12	AF16	23	11/20/12	14	39.89137551	293	396.03	0.06895527	0.06895527	0.06920402	0.069204023	0
wormd20121120s98AF16PB1167rt23w03r15	2	AF16.12	AF16	23	11/20/12	15	40.9526	293	380.37	0.07164998	0.06895527	0.07135466	0.069204023	0
wormd20121120s98AF16PB1167rt23w07r00	6	AF16.13	AF16	23	11/20/12	0	25.03423265	292	287.157191	0.59605188	0.081367856	0.65447899	0.081477045	1
wormd20121120s98AF16PB1167rt23w07r01	6	AF16.13	AF16	23	11/20/12	1	26.09545714	274	272.179856	0.70325788	0.081367856	0.77344895	0.081477045	1
wormd20121120s98AF16PB1167rt23w07r02	6	AF16.13	AF16	23	11/20/12	2	27.15668163	289	253.489865	0.60768285	0.081367856	0.7966359	0.081477045	1
wormd20121120s98AF16PB1167rt23w07r03	6	AF16.13	AF16	23	11/20/12	3	28.21790612	292	326.160535	0.69330161	0.081367856	0.81826606	0.081477045	1
wormd20121120s98AF16PB1167rt23w07r04	6	AF16.13	AF16	23	11/20/12	4	29.27913061	250	268.156489	0.7042424	0.081367856	0.84805503	0.081477045	1
wormd20121120s98AF16PB1167rt23w07r05	6	AF16.13	AF16	23	11/20/12	5	30.3403551	288	252.637288	0.64049548	0.081367856	0.82124218	0.081477045	1
wormd20121120s98AF16PB1167rt23w07r06	6	AF16.13	AF16	23	11/20/12	6	31.40157959	281	257.135417	0.69565655	0.081367856	0.8554716	0.081477045	1
wormd20121120s98AF16PB1167rt23w07r07	6	AF16.13	AF16	23	11/20/12	7	32.46280408	283	258.248276	0.74711313	0.081367856	0.8623122	0.081477045	1
wormd20121120s98AF16PB1167rt23w07r08	6	AF16.13	AF16	23	11/20/12	8	33.52402857	282	247.391003	0.63694335	0.081367856	0.80087263	0.081477045	1
wormd20121120s98AF16PB1167rt23w07r09	6	AF16.13	AF16	23	11/20/12	9	34.58525306	293	261.416667	0.12317387	0.081367856	0.39656674	0.081477045	1
wormd20121120s98AF16PB1167rt23w07r10	6	AF16.13	AF16	23	11/20/12	10	35.64647755	293	267.823333	0.08136786	0.081367856	0.13349715	0.081477045	0
wormd20121120s98AF16PB1167rt23w07r11	6	AF16.13	AF16	23	11/20/12	11	36.70770204	293	250.323333	0.10270957	0.081367856	0.23089141	0.081477045	1
wormd20121120s98AF16PB1167rt23w07r12	6	AF16.13	AF16	23	11/20/12	12	37.76892653	293	238.93	0.09243833	0.081367856	0.14835716	0.081477045	1
wormd20121120s98AF16PB1167rt23w07r13	6	AF16.13	AF16	23	11/20/12	13	38.83015102	293	240.703333	0.08151389	0.081367856	0.08163007	0.081477045	0
wormd20121120s98AF16PB1167rt23w07r14	6	AF16.13	AF16	23	11/20/12	14	39.89137551	293	260.11	0.08184457	0.081367856	0.08147704	0.081477045	0
wormd20121120s98AF16PB1167rt23w07r15	6	AF16.13	AF16	23	11/20/12	15	40.9526	293	267.946667	0.08803025	0.081367856	0.08542717	0.081477045	0
wormd20121120s98AF16PB1167rt23w08r00	7	AF16.14	AF16	23	11/20/12	0	25.03423265	293	400.443333	0.45468967	0.064619618	0.53457554	0.064633823	1
wormd20121120s98AF16PB1167rt23w08r01	7	AF16.14	AF16	23	11/20/12	1	26.09545714	191	315.443878	0.39534222	0.064619618	0.44228233	0.064633823	1
wormd20121120s98AF16PB1167rt23w08r02	7	AF16.14	AF16	23	11/20/12	2	27.15668163	200	384.864078	0.54230058	0.064619618	0.60412895	0.064633823	1
wormd20121120s98AF16PB1167rt23w08r03	7	AF16.14	AF16	23	11/20/12	3	28.21790612	286	407.587031	0.63781926	0.064619618	0.75245581	0.064633823	1
wormd20121120s98AF16PB1167rt23w08r04	7	AF16.14	AF16	23	11/20/12	4	29.27913061	255	369.637405	0.63880813	0.064619618	0.77802914	0.064633823	1
wormd20121120s98AF16PB1167rt23w08r05	7	AF16.14	AF16	23	11/20/12	5	30.3403551	293	427.75	0.52523702	0.064619618	0.72257589	0.064633823	1
wormd20121120s98AF16PB1167rt23w08r06	7	AF16.14	AF16	23	11/20/12	6	31.40157959	193	390.365	0.4500806	0.064619618	0.66047719	0.064633823	1
wormd20121120s98AF16PB1167rt23w08r07	7	AF16.14	AF16	23	11/20/12	7	32.46280408	201	403.081731	0.53554195	0.064619618	0.69818936	0.064633823	1
wormd20121120s98AF16PB1167rt23w08r08	7	AF16.14	AF16	23	11/20/12	8	33.52402857	264	400.436567	0.38459143	0.064619618	0.69628581	0.064633823	1
wormd20121120s98AF16PB1167rt23w08r10	7	AF16.14	AF16	23	11/20/12	10	35.64647755	293	420.76	0.0647005	0.064619618	0.10420608	0.064633823	0
wormd20121120s98AF16PB1167rt23w08r11	7	AF16.14	AF16	23	11/20/12	11	36.70770204	293	403.483333	0.07333444	0.064619618	0.16786383	0.064633823	1
wormd20121120s98AF16PB1167rt23w08r12	7	AF16.14	AF16	23	11/20/12	12	37.76892653	293	379.23	0.07061909	0.064619618	0.09636694	0.064633823	0
wormd20121120s98AF16PB1167rt23w08r13	7	AF16.14	AF16	23	11/20/12	13	38.83015102	293	367.493333	0.06461962	0.064619618	0.06463382	0.064633823	0
wormd20121120s98AF16PB1167rt23w08r14	7	AF16.14	AF16	23	11/20/12	14	39.89137551	293	361.04	0.06637191	0.064619618	0.06649169	0.064633823	0
wormd20121120s98AF16PB1167rt23w08r15	7	AF16.14	AF16	23	11/20/12	15	40.9526	293	362.423333	0.06758409	0.064619618	0.06960299	0.064633823	0
wormd20121120s98AF16PB1167rt23w09r00	8	AF16.15	AF16	23	11/20/12	0	25.03423265	293	378.95	0.55731394	0.054385445	0.54773001	0.057650283	1
wormd20121120s98AF16PB1167rt23w09r01	8	AF16.15	AF16	23	11/20/12	1	26.09545714	249	366.964844	0.61002502	0.054385445	0.76014796	0.057650283	1
wormd20121120s98AF16PB1167rt23w09r02	8	AF16.15	AF16	23	11/20/12	2	27.15668163	285	380.626712	0.63471118	0.054385445	0.76587557	0.057650283	1
wormd20121120s98AF16PB1167rt23w09r03	8	AF16.15	AF16	23	11/20/12	3	28.21790612	292	370.247492	0.63270118	0.054385445	0.75459746	0.057650283	1
wormd20121120s98AF16PB1167rt23w09r04	8	AF16.15	AF16	23	11/20/12	4	29.27913061	293	381.116667	0.65093491	0.054385445	0.79391428	0.057650283	1
wormd20121120s98AF16PB1167rt23w09r05	8	AF16.15	AF16	23	11/20/12	5	30.3403551	293	395.87	0.52797764	0.054385445	0.76305602	0.057650283	1
wormd20121120s98AF16PB1167rt23w09r06	8	AF16.15	AF16	23	11/20/12	6	31.40157959	146	333.764706	0.58192794	0.054385445	0.74062158	0.057650283	1
wormd20121120s98AF16PB1167rt23w09r07	8	AF16.15	AF16	23	11/20/12	7	32.46280408	293	372.593333	0.58123687	0.054385445	0.78189536	0.057650283	1
wormd20121120s98AF16PB1167rt23w09r08	8	AF16.15	AF16	23	11/20/12	8	33.52402857	132	357.328467	0.1439381	0.054385445	0.30121063	0.057650283	1
wormd20121120s98AF16PB1167rt23w09r09	8	AF16.15	AF16	23	11/20/12	9	34.58525306	248	400.25098	0.06035587	0.054385445	0.12390753	0.057650283	0
wormd20121120s98AF16PB1167rt23w09r10	8	AF16.15	AF16	23	11/20/12	10	35.64647755	163	344.130178	0.06736685	0.054385445	0.23343762	0.057650283	1
wormd20121120s98AF16PB1167rt23w09r11	8	AF16.15	AF16	23	11/20/12	11	36.70770204	252	384.046332	0.05438544	0.054385445	0.06787639	0.057650283	0
wormd20121120s98AF16PB1167rt23w09r12	8	AF16.15	AF16	23	11/20/12	12	37.76892653	293	366.143333	0.06057467	0.054385445	0.0626135	0.057650283	0
wormd20121120s98AF16PB1167rt23w09r13	8	AF16.15	AF16	23	11/20/12	13	38.83015102	293	349.72	0.05590149	0.054385445	0.05765028	0.057650283	0
wormd20121120s98AF16PB1167rt23w09r14	8	AF16.15	AF16	23	11/20/12	14	39.89137551	293	339.17	0.05965281	0.054385445	0.06179708	0.057650283	0
wormd20121120s98AF16PB1167rt23w09r15	8	AF16.15	AF16	23	11/20/12	15	40.9526	293	337.106667	0.06462354	0.054385445	0.06465351	0.057650283	0
wormd20121120s98AF16PB1167rt23w13r00	12	AF16.16	AF16	23	11/20/12	0	25.03423265	252	238.872587	0.63524806	0.11057374	0.67545463	0.112322324	1
wormd20121120s98AF16PB1167rt23w13r01	12	AF16.16	AF16	23	11/20/12	1	26.09545714	260	242.226415	0.68963217	0.11057374	0.75408038	0.112322324	1
wormd20121120s98AF16PB1167rt23w13r02	12	AF16.16	AF16	23	11/20/12	2	27.15668163	205	269.353774	0.67006791	0.11057374	0.6570727	0.112322324	1
wormd20121120s98AF16PB1167rt23w13r03	12	AF16.16	AF16	23	11/20/12	3	28.21790612	286	254.945392	0.66105346	0.11057374	0.72114797	0.112322324	1
wormd20121120s98AF16PB1167rt23w13r04	12	AF16.16	AF16	23	11/20/12	4	29.27913061	276	203.236749	0.72959422	0.11057374	0.77216443	0.112322324	1
wormd20121120s98AF16PB1167rt23w13r05	12	AF16.16	AF16	23	11/20/12	5	30.3403551	286	250.931741	0.53964166	0.11057374	0.7039257	0.112322324	1
wormd20121120s98AF16PB1167rt23w13r06	12	AF16.16	AF16	23	11/20/12	6	31.40157959	289	268.569492	0.53606797	0.11057374	0.73765867	0.112322324	1
wormd20121120s98AF16PB1167rt23w13r07	12	AF16.16	AF16	23	11/20/12	7	32.46280408	161	235.36747	0.52034559	0.11057374	0.67635735	0.112322324	1
wormd20121120s98AF16PB1167rt23w13r08	12	AF16.16	AF16	23	11/20/12	8	33.52402857	215	211.395455	0.6171013	0.11057374	0.87320773	0.112322324	1
wormd20121120s98AF16PB1167rt23w13r09	12	AF16.16	AF16	23	11/20/12	9	34.58525306	293	149.6	0.14298695	0.11057374	0.17218393	0.112322324	1
wormd20121120s98AF16PB1167rt23w13r10	12	AF16.16	AF16	23	11/20/12	10	35.64647755	280	155.299652	0.14410101	0.11057374	0.25350344	0.112322324	1
wormd20121120s98AF16PB1167rt23w13r11	12	AF16.16	AF16	23	11/20/12	11	36.70770204	293	164.936667	0.12192603	0.11057374	0.12236582	0.112322324	0
wormd20121120s98AF16PB1167rt23w13r12	12	AF16.16	AF16	23	11/20/12	12	37.76892653	293	166.97	0.12331134	0.11057374	0.12703589	0.112322324	0
wormd20121120s98AF16PB1167rt23w13r13	12	AF16.16	AF16	23	11/20/12	13	38.83015102	293	182.283333	0.11057374	0.11057374	0.11232232	0.112322324	0
wormd20121120s98AF16PB1167rt23w13r14	12	AF16.16	AF16	23	11/20/12	14	39.89137551	293	175.756667	0.12785036	0.11057374	0.13000216	0.112322324	0
wormd20121120s98AF16PB1167rt23w13r15	12	AF16.16	AF16	23	11/20/12	15	40.9526	293	181.876667	0.12006914	0.11057374	0.11974728	0.112322324	0
wormd20121120s98AF16PB1167rt23w14r00	13	AF16.17	AF16	23	11/20/12	0	25.03423265	238	390.693878	0.48523502	0.070858517	0.48378139	0.072395353	1
wormd20121120s98AF16PB1167rt23w14r01	13	AF16.17	AF16	23	11/20/12	1	26.09545714	238	417.167347	0.53125544	0.070858517	0.60208425	0.072395353	1
wormd20121120s98AF16PB1167rt23w14r02	13	AF16.17	AF16	23	11/20/12	2	27.15668163	184	420.893048	0.49143902	0.070858517	0.63568789	0.072395353	1
wormd20121120s98AF16PB1167rt23w14r03	13	AF16.17	AF16	23	11/20/12	3	28.21790612	202	428.492823	0.55272013	0.070858517	0.68778421	0.072395353	1
wormd20121120s98AF16PB1167rt23w14r04	13	AF16.17	AF16	23	11/20/12	4	29.27913061	165	430.245614	0.53260084	0.070858517	0.66334165	0.072395353	1
wormd20121120s98AF16PB1167rt23w14r05	13	AF16.17	AF16	23	11/20/12	5	30.3403551	183	425.568421	0.58214564	0.070858517	0.69607666	0.072395353	1
wormd20121120s98AF16PB1167rt23w14r06	13	AF16.17	AF16	23	11/20/12	6	31.40157959	241	437.689516	0.47755751	0.070858517	0.68031046	0.072395353	1
wormd20121120s98AF16PB1167rt23w14r07	13	AF16.17	AF16	23	11/20/12	7	32.46280408	209	412.675926	0.36043475	0.070858517	0.66541662	0.072395353	1
wormd20121120s98AF16PB1167rt23w14r08	13	AF16.17	AF16	23	11/20/12	8	33.52402857	293	369.073333	0.07830821	0.070858517	0.11661156	0.072395353	0
wormd20121120s98AF16PB1167rt23w14r09	13	AF16.17	AF16	23	11/20/12	9	34.58525306	293	374.373333	0.08317729	0.070858517	0.1597085	0.072395353	1
wormd20121120s98AF16PB1167rt23w14r10	13	AF16.17	AF16	23	11/20/12	10	35.64647755	293	381.796667	0.08854122	0.070858517	0.17225478	0.072395353	1
wormd20121120s98AF16PB1167rt23w14r11	13	AF16.17	AF16	23	11/20/12	11	36.70770204	292	367.341137	0.07963704	0.070858517	0.11390059	0.072395353	0
wormd20121120s98AF16PB1167rt23w14r12	13	AF16.17	AF16	23	11/20/12	12	37.76892653	293	349.923333	0.07242054	0.070858517	0.08266189	0.072395353	0
wormd20121120s98AF16PB1167rt23w14r13	13	AF16.17	AF16	23	11/20/12	13	38.83015102	293	352.656667	0.07246847	0.070858517	0.07297685	0.072395353	0
wormd20121120s98AF16PB1167rt23w14r14	13	AF16.17	AF16	23	11/20/12	14	39.89137551	293	354.583333	0.0717768	0.070858517	0.07239535	0.072395353	0
wormd20121120s98AF16PB1167rt23w14r15	13	AF16.17	AF16	23	11/20/12	15	40.9526	293	362.82	0.07085852	0.070858517	0.0728518	0.072395353	0
wormd20121120s98AF16PB1167rt23w15r00	14	AF16.18	AF16	23	11/20/12	0	25.03423265	293	310.49	0.52227353	0.078759383	0.72264375	0.081044911	1
wormd20121120s98AF16PB1167rt23w15r01	14	AF16.18	AF16	23	11/20/12	1	26.09545714	215	284.036036	0.6578195	0.078759383	0.68473159	0.081044911	1
wormd20121120s98AF16PB1167rt23w15r02	14	AF16.18	AF16	23	11/20/12	2	27.15668163	198	280.635468	0.68243024	0.078759383	0.75467663	0.081044911	1
wormd20121120s98AF16PB1167rt23w15r03	14	AF16.18	AF16	23	11/20/12	3	28.21790612	254	284.762452	0.69617784	0.078759383	0.78184875	0.081044911	1
wormd20121120s98AF16PB1167rt23w15r04	14	AF16.18	AF16	23	11/20/12	4	29.27913061	197	266.39801	0.68602108	0.078759383	0.76066486	0.081044911	1
wormd20121120s98AF16PB1167rt23w15r06	14	AF16.18	AF16	23	11/20/12	6	31.40157959	293	290.17	0.66869272	0.078759383	0.75776612	0.081044911	1
wormd20121120s98AF16PB1167rt23w15r07	14	AF16.18	AF16	23	11/20/12	7	32.46280408	118	273.967213	0.5652404	0.078759383	0.74845714	0.081044911	1
wormd20121120s98AF16PB1167rt23w15r08	14	AF16.18	AF16	23	11/20/12	8	33.52402857	197	308.950495	0.52942271	0.078759383	0.71006395	0.081044911	1
wormd20121120s98AF16PB1167rt23w15r09	14	AF16.18	AF16	23	11/20/12	9	34.58525306	293	289.936667	0.10913563	0.078759383	0.28284327	0.081044911	1
wormd20121120s98AF16PB1167rt23w15r10	14	AF16.18	AF16	23	11/20/12	10	35.64647755	290	286.360269	0.09670219	0.078759383	0.24620794	0.081044911	1
wormd20121120s98AF16PB1167rt23w15r11	14	AF16.18	AF16	23	11/20/12	11	36.70770204	292	286.622074	0.08711516	0.078759383	0.15815927	0.081044911	1
wormd20121120s98AF16PB1167rt23w15r12	14	AF16.18	AF16	23	11/20/12	12	37.76892653	293	279.496667	0.08341702	0.078759383	0.10753427	0.081044911	0
wormd20121120s98AF16PB1167rt23w15r13	14	AF16.18	AF16	23	11/20/12	13	38.83015102	293	261.806667	0.07875938	0.078759383	0.08104491	0.081044911	0
wormd20121120s98AF16PB1167rt23w15r14	14	AF16.18	AF16	23	11/20/12	14	39.89137551	293	258.56	0.07906709	0.078759383	0.08113411	0.081044911	0
wormd20121120s98AF16PB1167rt23w15r15	14	AF16.18	AF16	23	11/20/12	15	40.9526	293	251.646667	0.08512252	0.078759383	0.08581177	0.081044911	0
wormd20121121s97AF16PB1166rt23w01r00	0	AF16.19	AF16	23	11/21/12	0	25.03423265	169	272.148571	0.57282933	0.077540905	0.64305869	0.081422726	1
wormd20121121s97AF16PB1166rt23w01r01	0	AF16.19	AF16	23	11/21/12	1	26.09545714	152	308.405063	0.41585212	0.077540905	0.59241333	0.081422726	1
wormd20121121s97AF16PB1166rt23w01r02	0	AF16.19	AF16	23	11/21/12	2	27.15668163	239	354.760331	0.65140484	0.077540905	0.79701282	0.081422726	1
wormd20121121s97AF16PB1166rt23w01r03	0	AF16.19	AF16	23	11/21/12	3	28.21790612	232	374.410042	0.70286639	0.077540905	0.82913286	0.081422726	1
wormd20121121s97AF16PB1166rt23w01r04	0	AF16.19	AF16	23	11/21/12	4	29.27913061	278	330.936396	0.47347494	0.077540905	0.71130879	0.081422726	1
wormd20121121s97AF16PB1166rt23w01r05	0	AF16.19	AF16	23	11/21/12	5	30.3403551	162	343.04878	0.65705453	0.077540905	0.76904366	0.081422726	1
wormd20121121s97AF16PB1166rt23w01r06	0	AF16.19	AF16	23	11/21/12	6	31.40157959	147	387.331126	0.66832463	0.077540905	0.77817436	0.081422726	1
wormd20121121s97AF16PB1166rt23w01r07	0	AF16.19	AF16	23	11/21/12	7	32.46280408	205	321.72381	0.72672592	0.077540905	0.83298329	0.081422726	1
wormd20121121s97AF16PB1166rt23w01r08	0	AF16.19	AF16	23	11/21/12	8	33.52402857	170	376.04	0.54115403	0.077540905	0.72311401	0.081422726	1
wormd20121121s97AF16PB1166rt23w01r09	0	AF16.19	AF16	23	11/21/12	9	34.58525306	289	375.060811	0.48702756	0.077540905	0.76190133	0.081422726	1
wormd20121121s97AF16PB1166rt23w01r11	0	AF16.19	AF16	23	11/21/12	11	36.70770204	293	362.223333	0.10301161	0.077540905	0.25470157	0.081422726	1
wormd20121121s97AF16PB1166rt23w01r12	0	AF16.19	AF16	23	11/21/12	12	37.76892653	293	331.713333	0.0775409	0.077540905	0.08249465	0.081422726	0
wormd20121121s97AF16PB1166rt23w01r13	0	AF16.19	AF16	23	11/21/12	13	38.83015102	293	328.693333	0.08178013	0.077540905	0.08142273	0.081422726	0
wormd20121121s97AF16PB1166rt23w01r14	0	AF16.19	AF16	23	11/21/12	14	39.89137551	293	338.266667	0.09316545	0.077540905	0.09457704	0.081422726	0
wormd20121121s97AF16PB1166rt23w01r15	0	AF16.19	AF16	23	11/21/12	15	40.9526	293	347.213333	0.09846599	0.077540905	0.09947877	0.081422726	0
wormd20121121s97AF16PB1166rt23w02r00	1	AF16.20	AF16	23	11/21/12	0	25.03423265	293	505.856667	0.40716523	0.053024894	0.66804742	0.054772536	1
wormd20121121s97AF16PB1166rt23w02r01	1	AF16.20	AF16	23	11/21/12	1	26.09545714	293	507.273333	0.57465999	0.053024894	0.60162239	0.054772536	1
wormd20121121s97AF16PB1166rt23w02r02	1	AF16.20	AF16	23	11/21/12	2	27.15668163	293	506.03	0.50866433	0.053024894	0.67988253	0.054772536	1
wormd20121121s97AF16PB1166rt23w02r03	1	AF16.20	AF16	23	11/21/12	3	28.21790612	284	512.975945	0.52003026	0.053024894	0.68983106	0.054772536	1
wormd20121121s97AF16PB1166rt23w02r04	1	AF16.20	AF16	23	11/21/12	4	29.27913061	293	488.333333	0.52489151	0.053024894	0.69392402	0.054772536	1
wormd20121121s97AF16PB1166rt23w02r05	1	AF16.20	AF16	23	11/21/12	5	30.3403551	292	499.354515	0.52083766	0.053024894	0.75825612	0.054772536	1
wormd20121121s97AF16PB1166rt23w02r06	1	AF16.20	AF16	23	11/21/12	6	31.40157959	293	503.626667	0.55495963	0.053024894	0.76243746	0.054772536	1
wormd20121121s97AF16PB1166rt23w02r07	1	AF16.20	AF16	23	11/21/12	7	32.46280408	293	490.736667	0.51418067	0.053024894	0.74344046	0.054772536	1
wormd20121121s97AF16PB1166rt23w02r08	1	AF16.20	AF16	23	11/21/12	8	33.52402857	293	496.396667	0.4310694	0.053024894	0.71339699	0.054772536	1
wormd20121121s97AF16PB1166rt23w02r09	1	AF16.20	AF16	23	11/21/12	9	34.58525306	293	533.876667	0.06560408	0.053024894	0.10820335	0.054772536	0
wormd20121121s97AF16PB1166rt23w02r10	1	AF16.20	AF16	23	11/21/12	10	35.64647755	293	550.603333	0.05576296	0.053024894	0.0602057	0.054772536	0
wormd20121121s97AF16PB1166rt23w02r11	1	AF16.20	AF16	23	11/21/12	11	36.70770204	293	560.076667	0.05496289	0.053024894	0.05477254	0.054772536	0
wormd20121121s97AF16PB1166rt23w02r12	1	AF16.20	AF16	23	11/21/12	12	37.76892653	293	561.86	0.05904406	0.053024894	0.05897061	0.054772536	0
wormd20121121s97AF16PB1166rt23w02r13	1	AF16.20	AF16	23	11/21/12	13	38.83015102	293	556.376667	0.05942547	0.053024894	0.059971	0.054772536	0
wormd20121121s97AF16PB1166rt23w02r14	1	AF16.20	AF16	23	11/21/12	14	39.89137551	293	531.206667	0.06085535	0.053024894	0.060611	0.054772536	0
wormd20121121s97AF16PB1166rt23w02r15	1	AF16.20	AF16	23	11/21/12	15	40.9526	293	498.99	0.05302489	0.053024894	0.05484968	0.054772536	0
wormd20121121s97AF16PB1166rt23w03r00	2	AF16.21	AF16	23	11/21/12	0	25.03423265	276	403.339223	0.62122756	0.070796992	0.71677694	0.088317596	1
wormd20121121s97AF16PB1166rt23w03r01	2	AF16.21	AF16	23	11/21/12	1	26.09545714	280	394.707317	0.67543843	0.070796992	0.77619175	0.088317596	1
wormd20121121s97AF16PB1166rt23w03r02	2	AF16.21	AF16	23	11/21/12	2	27.15668163	216	399.394495	0.67512958	0.070796992	0.76281915	0.088317596	1
wormd20121121s97AF16PB1166rt23w03r03	2	AF16.21	AF16	23	11/21/12	3	28.21790612	160	405.808383	0.67004197	0.070796992	0.81304809	0.088317596	1
wormd20121121s97AF16PB1166rt23w03r04	2	AF16.21	AF16	23	11/21/12	4	29.27913061	169	419.180233	0.64403287	0.070796992	0.7376836	0.088317596	1
wormd20121121s97AF16PB1166rt23w03r05	2	AF16.21	AF16	23	11/21/12	5	30.3403551	258	398.071698	0.66116881	0.070796992	0.79463148	0.088317596	1
wormd20121121s97AF16PB1166rt23w03r06	2	AF16.21	AF16	23	11/21/12	6	31.40157959	277	404.964789	0.67903935	0.070796992	0.80063119	0.088317596	1
wormd20121121s97AF16PB1166rt23w03r07	2	AF16.21	AF16	23	11/21/12	7	32.46280408	168	417.137143	0.58258193	0.070796992	0.7666234	0.088317596	1
wormd20121121s97AF16PB1166rt23w03r08	2	AF16.21	AF16	23	11/21/12	8	33.52402857	228	437.238298	0.41611841	0.070796992	0.67516222	0.088317596	1
wormd20121121s97AF16PB1166rt23w03r09	2	AF16.21	AF16	23	11/21/12	9	34.58525306	293	447.01	0.07079699	0.070796992	0.11518682	0.088317596	0
wormd20121121s97AF16PB1166rt23w03r10	2	AF16.21	AF16	23	11/21/12	10	35.64647755	293	369.843333	0.11768375	0.070796992	0.46927201	0.088317596	1
wormd20121121s97AF16PB1166rt23w03r11	2	AF16.21	AF16	23	11/21/12	11	36.70770204	293	397.116667	0.1334954	0.070796992	0.47904512	0.088317596	1
wormd20121121s97AF16PB1166rt23w03r12	2	AF16.21	AF16	23	11/21/12	12	37.76892653	293	363.226667	0.0905807	0.070796992	0.19699291	0.088317596	1
wormd20121121s97AF16PB1166rt23w03r13	2	AF16.21	AF16	23	11/21/12	13	38.83015102	293	328.966667	0.08725392	0.070796992	0.0883176	0.088317596	0
wormd20121121s97AF16PB1166rt23w03r14	2	AF16.21	AF16	23	11/21/12	14	39.89137551	293	319.4	0.09127378	0.070796992	0.09091292	0.088317596	0
wormd20121121s97AF16PB1166rt23w03r15	2	AF16.21	AF16	23	11/21/12	15	40.9526	293	314.526667	0.0974529	0.070796992	0.09638972	0.088317596	0
wormd20121121s97AF16PB1166rt23w07r00	6	AF16.22	AF16	23	11/21/12	0	25.03423265	292	365.26087	0.51552199	0.087842365	0.75817533	0.088368594	1
wormd20121121s97AF16PB1166rt23w07r01	6	AF16.22	AF16	23	11/21/12	1	26.09545714	280	399.226481	0.54304655	0.087842365	0.76465896	0.088368594	1
wormd20121121s97AF16PB1166rt23w07r02	6	AF16.22	AF16	23	11/21/12	2	27.15668163	220	387.132159	0.62052167	0.087842365	0.77657314	0.088368594	1
wormd20121121s97AF16PB1166rt23w07r06	6	AF16.22	AF16	23	11/21/12	6	31.40157959	206	112.098592	0.19622732	0.087842365	0.21188493	0.088368594	1
wormd20121121s97AF16PB1166rt23w07r07	6	AF16.22	AF16	23	11/21/12	7	32.46280408	273	127.778571	0.18060805	0.087842365	0.18866587	0.088368594	1
wormd20121121s97AF16PB1166rt23w07r08	6	AF16.22	AF16	23	11/21/12	8	33.52402857	292	149.735786	0.16404148	0.087842365	0.17174816	0.088368594	1
wormd20121121s97AF16PB1166rt23w07r09	6	AF16.22	AF16	23	11/21/12	9	34.58525306	293	169.716667	0.16638544	0.087842365	0.17087033	0.088368594	1
wormd20121121s97AF16PB1166rt23w07r10	6	AF16.22	AF16	23	11/21/12	10	35.64647755	293	187.273333	0.1211807	0.087842365	0.12732365	0.088368594	0
wormd20121121s97AF16PB1166rt23w07r11	6	AF16.22	AF16	23	11/21/12	11	36.70770204	291	203.479866	0.09642578	0.087842365	0.10034162	0.088368594	0
wormd20121121s97AF16PB1166rt23w07r12	6	AF16.22	AF16	23	11/21/12	12	37.76892653	293	212.393333	0.08784236	0.087842365	0.08836859	0.088368594	0
wormd20121121s97AF16PB1166rt23w07r13	6	AF16.22	AF16	23	11/21/12	13	38.83015102	293	219.76	0.08856998	0.087842365	0.09235931	0.088368594	0
wormd20121121s97AF16PB1166rt23w07r14	6	AF16.22	AF16	23	11/21/12	14	39.89137551	293	225.153333	0.09252631	0.087842365	0.09681143	0.088368594	0
wormd20121121s97AF16PB1166rt23w07r15	6	AF16.22	AF16	23	11/21/12	15	40.9526	293	232.333333	0.08957385	0.087842365	0.09275605	0.088368594	0
wormd20121121s97AF16PB1166rt23w08r00	7	AF16.23	AF16	23	11/21/12	0	25.03423265	228	425.128205	0.62994021	0.067569559	0.72492352	0.069799889	1
wormd20121121s97AF16PB1166rt23w08r01	7	AF16.23	AF16	23	11/21/12	1	26.09545714	274	425.939502	0.59215029	0.067569559	0.70837821	0.069799889	1
wormd20121121s97AF16PB1166rt23w08r02	7	AF16.23	AF16	23	11/21/12	2	27.15668163	286	432.52901	0.65050187	0.067569559	0.77927113	0.069799889	1
wormd20121121s97AF16PB1166rt23w08r03	7	AF16.23	AF16	23	11/21/12	3	28.21790612	193	463.425	0.50931031	0.067569559	0.65572217	0.069799889	1
wormd20121121s97AF16PB1166rt23w08r04	7	AF16.23	AF16	23	11/21/12	4	29.27913061	246	450.620553	0.61349381	0.067569559	0.77024745	0.069799889	1
wormd20121121s97AF16PB1166rt23w08r05	7	AF16.23	AF16	23	11/21/12	5	30.3403551	223	416.978261	0.63442975	0.067569559	0.79025193	0.069799889	1
wormd20121121s97AF16PB1166rt23w08r06	7	AF16.23	AF16	23	11/21/12	6	31.40157959	262	446.973978	0.6104012	0.067569559	0.7427602	0.069799889	1
wormd20121121s97AF16PB1166rt23w08r07	7	AF16.23	AF16	23	11/21/12	7	32.46280408	293	425.296667	0.48402715	0.067569559	0.6542396	0.069799889	1
wormd20121121s97AF16PB1166rt23w08r08	7	AF16.23	AF16	23	11/21/12	8	33.52402857	289	433.875	0.4040408	0.067569559	0.56831323	0.069799889	1
wormd20121121s97AF16PB1166rt23w08r09	7	AF16.23	AF16	23	11/21/12	9	34.58525306	293	421.813333	0.3286116	0.067569559	0.63012701	0.069799889	1
wormd20121121s97AF16PB1166rt23w08r10	7	AF16.23	AF16	23	11/21/12	10	35.64647755	293	418.11	0.08991561	0.067569559	0.31124816	0.069799889	1
wormd20121121s97AF16PB1166rt23w08r11	7	AF16.23	AF16	23	11/21/12	11	36.70770204	293	429.55	0.07674813	0.067569559	0.1912777	0.069799889	1
wormd20121121s97AF16PB1166rt23w08r12	7	AF16.23	AF16	23	11/21/12	12	37.76892653	293	387.74	0.06756956	0.067569559	0.07618086	0.069799889	0
wormd20121121s97AF16PB1166rt23w08r13	7	AF16.23	AF16	23	11/21/12	13	38.83015102	293	345.85	0.07074891	0.067569559	0.0716153	0.069799889	0
wormd20121121s97AF16PB1166rt23w08r14	7	AF16.23	AF16	23	11/21/12	14	39.89137551	293	353.99	0.06835619	0.067569559	0.06979989	0.069799889	0
wormd20121121s97AF16PB1166rt23w08r15	7	AF16.23	AF16	23	11/21/12	15	40.9526	293	366.143333	0.07343189	0.067569559	0.07374591	0.069799889	0
wormd20121121s97AF16PB1166rt23w09r00	8	AF16.24	AF16	23	11/21/12	0	25.03423265	232	313.330544	0.57197744	0.064336101	0.64958903	0.066361693	1
wormd20121121s97AF16PB1166rt23w09r01	8	AF16.24	AF16	23	11/21/12	1	26.09545714	211	337.169725	0.64713912	0.064336101	0.7488614	0.066361693	1
wormd20121121s97AF16PB1166rt23w09r02	8	AF16.24	AF16	23	11/21/12	2	27.15668163	260	344.121212	0.70042705	0.064336101	0.81120305	0.066361693	1
wormd20121121s97AF16PB1166rt23w09r03	8	AF16.24	AF16	23	11/21/12	3	28.21790612	256	357.479087	0.69252046	0.064336101	0.80006097	0.066361693	1
wormd20121121s97AF16PB1166rt23w09r04	8	AF16.24	AF16	23	11/21/12	4	29.27913061	249	345.325397	0.67947362	0.064336101	0.80636466	0.066361693	1
wormd20121121s97AF16PB1166rt23w09r05	8	AF16.24	AF16	23	11/21/12	5	30.3403551	272	362.795699	0.58058873	0.064336101	0.78559256	0.066361693	1
wormd20121121s97AF16PB1166rt23w09r06	8	AF16.24	AF16	23	11/21/12	6	31.40157959	233	357.6125	0.663715	0.064336101	0.78052089	0.066361693	1
wormd20121121s97AF16PB1166rt23w09r07	8	AF16.24	AF16	23	11/21/12	7	32.46280408	231	347.634454	0.46831763	0.064336101	0.71345244	0.066361693	1
wormd20121121s97AF16PB1166rt23w09r08	8	AF16.24	AF16	23	11/21/12	8	33.52402857	267	318.90146	0.41565894	0.064336101	0.78780688	0.066361693	1
wormd20121121s97AF16PB1166rt23w09r09	8	AF16.24	AF16	23	11/21/12	9	34.58525306	293	333.13	0.08355315	0.064336101	0.19286029	0.066361693	1
wormd20121121s97AF16PB1166rt23w09r10	8	AF16.24	AF16	23	11/21/12	10	35.64647755	293	307.87	0.11681116	0.064336101	0.50351484	0.066361693	1
wormd20121121s97AF16PB1166rt23w09r11	8	AF16.24	AF16	23	11/21/12	11	36.70770204	293	329.033333	0.08756394	0.064336101	0.2322376	0.066361693	1
wormd20121121s97AF16PB1166rt23w09r12	8	AF16.24	AF16	23	11/21/12	12	37.76892653	293	309.226667	0.0643361	0.064336101	0.06660984	0.066361693	0
wormd20121121s97AF16PB1166rt23w09r13	8	AF16.24	AF16	23	11/21/12	13	38.83015102	293	318.43	0.06603651	0.064336101	0.06636169	0.066361693	0
wormd20121121s97AF16PB1166rt23w09r14	8	AF16.24	AF16	23	11/21/12	14	39.89137551	293	307.43	0.07068092	0.064336101	0.07176645	0.066361693	0
wormd20121121s97AF16PB1166rt23w09r15	8	AF16.24	AF16	23	11/21/12	15	40.9526	293	308.823333	0.07090699	0.064336101	0.07170425	0.066361693	0
wormd20121121s97AF16PB1166rt23w13r00	12	AF16.25	AF16	23	11/21/12	0	25.03423265	274	320.501779	0.73509353	0.102439198	0.7985072	0.111710059	1
wormd20121121s97AF16PB1166rt23w13r01	12	AF16.25	AF16	23	11/21/12	1	26.09545714	248	386.231373	0.69133345	0.102439198	0.79119893	0.111710059	1
wormd20121121s97AF16PB1166rt23w13r02	12	AF16.25	AF16	23	11/21/12	2	27.15668163	221	393.6	0.65604739	0.102439198	0.77726736	0.111710059	1
wormd20121121s97AF16PB1166rt23w13r03	12	AF16.25	AF16	23	11/21/12	3	28.21790612	214	375.076923	0.63435001	0.102439198	0.77717813	0.111710059	1
wormd20121121s97AF16PB1166rt23w13r04	12	AF16.25	AF16	23	11/21/12	4	29.27913061	229	414.432203	0.64837833	0.102439198	0.78239476	0.111710059	1
wormd20121121s97AF16PB1166rt23w13r05	12	AF16.25	AF16	23	11/21/12	5	30.3403551	231	396.863248	0.66036056	0.102439198	0.77863521	0.111710059	1
wormd20121121s97AF16PB1166rt23w13r07	12	AF16.25	AF16	23	11/21/12	7	32.46280408	124	241.145038	0.13395317	0.102439198	0.1355949	0.111710059	0
wormd20121121s97AF16PB1166rt23w13r08	12	AF16.25	AF16	23	11/21/12	8	33.52402857	128	309.466165	0.22352689	0.102439198	0.33463794	0.111710059	1
wormd20121121s97AF16PB1166rt23w13r09	12	AF16.25	AF16	23	11/21/12	9	34.58525306	282	377.768166	0.36328908	0.102439198	0.71766798	0.111710059	1
wormd20121121s97AF16PB1166rt23w13r10	12	AF16.25	AF16	23	11/21/12	10	35.64647755	290	452.259259	0.10595649	0.102439198	0.20252577	0.111710059	1
wormd20121121s97AF16PB1166rt23w13r11	12	AF16.25	AF16	23	11/21/12	11	36.70770204	293	403.796667	0.10879287	0.102439198	0.22253482	0.111710059	1
wormd20121121s97AF16PB1166rt23w13r12	12	AF16.25	AF16	23	11/21/12	12	37.76892653	293	387.286667	0.1024392	0.102439198	0.14539152	0.111710059	1
wormd20121121s97AF16PB1166rt23w13r13	12	AF16.25	AF16	23	11/21/12	13	38.83015102	293	410.01	0.1091141	0.102439198	0.14473168	0.111710059	1
wormd20121121s97AF16PB1166rt23w13r14	12	AF16.25	AF16	23	11/21/12	14	39.89137551	293	402.443333	0.11298891	0.102439198	0.11171006	0.111710059	0
wormd20121121s97AF16PB1166rt23w13r15	12	AF16.25	AF16	23	11/21/12	15	40.9526	293	388.03	0.11527561	0.102439198	0.11188761	0.111710059	0
wormd20121121s97AF16PB1166rt23w14r00	13	AF16.26	AF16	23	11/21/12	0	25.03423265	290	396.902357	0.6109427	0.063370325	0.70031835	0.066974694	1
wormd20121121s97AF16PB1166rt23w14r01	13	AF16.26	AF16	23	11/21/12	1	26.09545714	260	399.082397	0.67504767	0.063370325	0.78717009	0.066974694	1
wormd20121121s97AF16PB1166rt23w14r02	13	AF16.26	AF16	23	11/21/12	2	27.15668163	274	419.582143	0.63647236	0.063370325	0.80008265	0.066974694	1
wormd20121121s97AF16PB1166rt23w14r03	13	AF16.26	AF16	23	11/21/12	3	28.21790612	271	396.869091	0.67580167	0.063370325	0.81247421	0.066974694	1
wormd20121121s97AF16PB1166rt23w14r04	13	AF16.26	AF16	23	11/21/12	4	29.27913061	250	375.396887	0.73657892	0.063370325	0.83861447	0.066974694	1
wormd20121121s97AF16PB1166rt23w14r05	13	AF16.26	AF16	23	11/21/12	5	30.3403551	290	387.976431	0.67030307	0.063370325	0.82179558	0.066974694	1
wormd20121121s97AF16PB1166rt23w14r06	13	AF16.26	AF16	23	11/21/12	6	31.40157959	264	404.055351	0.69078011	0.063370325	0.81719614	0.066974694	1
wormd20121121s97AF16PB1166rt23w14r07	13	AF16.26	AF16	23	11/21/12	7	32.46280408	162	380.760479	0.60330293	0.063370325	0.71679239	0.066974694	1
wormd20121121s97AF16PB1166rt23w14r08	13	AF16.26	AF16	23	11/21/12	8	33.52402857	293	400.306667	0.49249411	0.063370325	0.75125191	0.066974694	1
wormd20121121s97AF16PB1166rt23w14r09	13	AF16.26	AF16	23	11/21/12	9	34.58525306	293	440.373333	0.08262319	0.063370325	0.16010811	0.066974694	1
wormd20121121s97AF16PB1166rt23w14r10	13	AF16.26	AF16	23	11/21/12	10	35.64647755	195	375.117647	0.18255305	0.063370325	0.65931484	0.066974694	1
wormd20121121s97AF16PB1166rt23w14r11	13	AF16.26	AF16	23	11/21/12	11	36.70770204	254	345.478571	0.07386417	0.063370325	0.15441329	0.066974694	1
wormd20121121s97AF16PB1166rt23w14r12	13	AF16.26	AF16	23	11/21/12	12	37.76892653	293	346.726667	0.06337032	0.063370325	0.06697469	0.066974694	0
wormd20121121s97AF16PB1166rt23w14r13	13	AF16.26	AF16	23	11/21/12	13	38.83015102	293	344.793333	0.07283929	0.063370325	0.09551907	0.066974694	0
wormd20121121s97AF16PB1166rt23w14r14	13	AF16.26	AF16	23	11/21/12	14	39.89137551	293	376.943333	0.06928366	0.063370325	0.06889342	0.066974694	0
wormd20121121s97AF16PB1166rt23w14r15	13	AF16.26	AF16	23	11/21/12	15	40.9526	293	388.166667	0.06999713	0.063370325	0.07012114	0.066974694	0
wormd20121121s97AF16PB1166rt23w15r00	14	AF16.27	AF16	23	11/21/12	0	25.03423265	287	345.65529	0.69742192	0.08324705	0.7686003	0.084318741	1
wormd20121121s97AF16PB1166rt23w15r01	14	AF16.27	AF16	23	11/21/12	1	26.09545714	286	380.484642	0.67474541	0.08324705	0.75193097	0.084318741	1
wormd20121121s97AF16PB1166rt23w15r02	14	AF16.27	AF16	23	11/21/12	2	27.15668163	283	364.189655	0.60023901	0.08324705	0.76867751	0.084318741	1
wormd20121121s97AF16PB1166rt23w15r03	14	AF16.27	AF16	23	11/21/12	3	28.21790612	286	362.740614	0.6669443	0.08324705	0.79927432	0.084318741	1
wormd20121121s97AF16PB1166rt23w15r04	14	AF16.27	AF16	23	11/21/12	4	29.27913061	291	357.620805	0.68312231	0.08324705	0.79312195	0.084318741	1
wormd20121121s97AF16PB1166rt23w15r05	14	AF16.27	AF16	23	11/21/12	5	30.3403551	286	367.969283	0.67614391	0.08324705	0.80617919	0.084318741	1
wormd20121121s97AF16PB1166rt23w15r06	14	AF16.27	AF16	23	11/21/12	6	31.40157959	252	361.268482	0.68354916	0.08324705	0.79227637	0.084318741	1
wormd20121121s97AF16PB1166rt23w15r07	14	AF16.27	AF16	23	11/21/12	7	32.46280408	239	369.789256	0.64686134	0.08324705	0.76478811	0.084318741	1
wormd20121121s97AF16PB1166rt23w15r08	14	AF16.27	AF16	23	11/21/12	8	33.52402857	236	376.502058	0.52379116	0.08324705	0.77620556	0.084318741	1
wormd20121121s97AF16PB1166rt23w15r09	14	AF16.27	AF16	23	11/21/12	9	34.58525306	293	370.276667	0.34747412	0.08324705	0.67037027	0.084318741	1
wormd20121121s97AF16PB1166rt23w15r10	14	AF16.27	AF16	23	11/21/12	10	35.64647755	288	364.722034	0.17450183	0.08324705	0.67890746	0.084318741	1
wormd20121121s97AF16PB1166rt23w15r11	14	AF16.27	AF16	23	11/21/12	11	36.70770204	293	383.103333	0.11700034	0.08324705	0.43110713	0.084318741	1
wormd20121121s97AF16PB1166rt23w15r12	14	AF16.27	AF16	23	11/21/12	12	37.76892653	293	342.886667	0.11139732	0.08324705	0.1085599	0.084318741	0
wormd20121121s97AF16PB1166rt23w15r13	14	AF16.27	AF16	23	11/21/12	13	38.83015102	226	331.866953	0.09688716	0.08324705	0.19067389	0.084318741	1
wormd20121121s97AF16PB1166rt23w15r15	14	AF16.27	AF16	23	11/21/12	15	40.9526	290	393.511785	0.08324705	0.08324705	0.08431874	0.084318741	0
wormd20121123s147AF16PB1137rt23w01r00	0	AF16.28	AF16	23	11/23/12	0	25.03423265	283	348.358621	0.58294822	0.084915602	0.68626934	0.086728974	1
wormd20121123s147AF16PB1137rt23w01r01	0	AF16.28	AF16	23	11/23/12	1	26.09545714	224	386.545852	0.62593579	0.084915602	0.75800515	0.086728974	1
wormd20121123s147AF16PB1137rt23w01r02	0	AF16.28	AF16	23	11/23/12	2	27.15668163	197	428.571429	0.55824798	0.084915602	0.72822892	0.086728974	1
wormd20121123s147AF16PB1137rt23w01r03	0	AF16.28	AF16	23	11/23/12	3	28.21790612	114	453.352941	0.46161387	0.084915602	0.63353673	0.086728974	1
wormd20121123s147AF16PB1137rt23w01r05	0	AF16.28	AF16	23	11/23/12	5	30.3403551	136	357.371429	0.60565707	0.084915602	0.78796016	0.086728974	1
wormd20121123s147AF16PB1137rt23w01r08	0	AF16.28	AF16	23	11/23/12	8	33.52402857	103	385.660377	0.51269077	0.084915602	0.70208394	0.086728974	1
wormd20121123s147AF16PB1137rt23w01r09	0	AF16.28	AF16	23	11/23/12	9	34.58525306	102	458.102804	0.57548102	0.084915602	0.81174825	0.086728974	1
wormd20121123s147AF16PB1137rt23w01r10	0	AF16.28	AF16	23	11/23/12	10	35.64647755	293	323.366667	0.0849156	0.084915602	0.0870225	0.086728974	0
wormd20121123s147AF16PB1137rt23w01r11	0	AF16.28	AF16	23	11/23/12	11	36.70770204	293	324.143333	0.0896462	0.084915602	0.09597695	0.086728974	0
wormd20121123s147AF16PB1137rt23w01r12	0	AF16.28	AF16	23	11/23/12	12	37.76892653	293	340.793333	0.08553553	0.084915602	0.08672897	0.086728974	0
wormd20121123s147AF16PB1137rt23w01r13	0	AF16.28	AF16	23	11/23/12	13	38.83015102	293	350.256667	0.0897465	0.084915602	0.09695428	0.086728974	0
wormd20121123s147AF16PB1137rt23w01r14	0	AF16.28	AF16	23	11/23/12	14	39.89137551	293	344.396667	0.09748947	0.084915602	0.09770434	0.086728974	0
wormd20121123s147AF16PB1137rt23w01r15	0	AF16.28	AF16	23	11/23/12	15	40.9526	293	373.3	0.10513693	0.084915602	0.1064525	0.086728974	0
wormd20121123s147AF16PB1137rt23w02r00	1	AF16.29	AF16	23	11/23/12	0	25.03423265	293	401.526667	0.5842145	0.064090538	0.59614874	0.067863467	1
wormd20121123s147AF16PB1137rt23w02r01	1	AF16.29	AF16	23	11/23/12	1	26.09545714	291	416.077181	0.51090675	0.064090538	0.71894187	0.067863467	1
wormd20121123s147AF16PB1137rt23w02r02	1	AF16.29	AF16	23	11/23/12	2	27.15668163	115	386.92623	0.32576825	0.064090538	0.66547325	0.067863467	1
wormd20121123s147AF16PB1137rt23w02r03	1	AF16.29	AF16	23	11/23/12	3	28.21790612	268	408.860294	0.51199234	0.064090538	0.76819489	0.067863467	1
wormd20121123s147AF16PB1137rt23w02r05	1	AF16.29	AF16	23	11/23/12	5	30.3403551	131	367.830882	0.49521884	0.064090538	0.73350851	0.067863467	1
wormd20121123s147AF16PB1137rt23w02r06	1	AF16.29	AF16	23	11/23/12	6	31.40157959	245	403.864542	0.49796343	0.064090538	0.7212552	0.067863467	1
wormd20121123s147AF16PB1137rt23w02r07	1	AF16.29	AF16	23	11/23/12	7	32.46280408	212	390.940639	0.66756668	0.064090538	0.79145159	0.067863467	1
wormd20121123s147AF16PB1137rt23w02r08	1	AF16.29	AF16	23	11/23/12	8	33.52402857	113	430.940678	0.3880731	0.064090538	0.71611456	0.067863467	1
wormd20121123s147AF16PB1137rt23w02r09	1	AF16.29	AF16	23	11/23/12	9	34.58525306	195	433.025	0.09622328	0.064090538	0.39378213	0.067863467	1
wormd20121123s147AF16PB1137rt23w02r10	1	AF16.29	AF16	23	11/23/12	10	35.64647755	231	438.186441	0.10834152	0.064090538	0.45280791	0.067863467	1
wormd20121123s147AF16PB1137rt23w02r11	1	AF16.29	AF16	23	11/23/12	11	36.70770204	249	448.934363	0.06409054	0.064090538	0.08669617	0.067863467	0
wormd20121123s147AF16PB1137rt23w02r12	1	AF16.29	AF16	23	11/23/12	12	37.76892653	287	425.598639	0.0673728	0.064090538	0.1098417	0.067863467	0
wormd20121123s147AF16PB1137rt23w02r13	1	AF16.29	AF16	23	11/23/12	13	38.83015102	293	370.436667	0.08307648	0.064090538	0.16581768	0.067863467	1
wormd20121123s147AF16PB1137rt23w02r14	1	AF16.29	AF16	23	11/23/12	14	39.89137551	293	347.666667	0.06698689	0.064090538	0.06827104	0.067863467	0
wormd20121123s147AF16PB1137rt23w02r15	1	AF16.29	AF16	23	11/23/12	15	40.9526	293	340.693333	0.06655853	0.064090538	0.06786347	0.067863467	0
wormd20121123s147AF16PB1137rt23w03r00	2	AF16.30	AF16	23	11/23/12	0	25.03423265	293	365.06	0.5765169	0.031501342	0.71297597	0.032648325	1
wormd20121123s147AF16PB1137rt23w03r01	2	AF16.30	AF16	23	11/23/12	1	26.09545714	259	370.921053	0.61982695	0.031501342	0.75506122	0.032648325	1
wormd20121123s147AF16PB1137rt23w03r02	2	AF16.30	AF16	23	11/23/12	2	27.15668163	169	365.902299	0.62071242	0.031501342	0.76693657	0.032648325	1
wormd20121123s147AF16PB1137rt23w03r03	2	AF16.30	AF16	23	11/23/12	3	28.21790612	241	365.262097	0.63176998	0.031501342	0.78543656	0.032648325	1
wormd20121123s147AF16PB1137rt23w03r04	2	AF16.30	AF16	23	11/23/12	4	29.27913061	107	324.318584	0.51530341	0.031501342	0.64566708	0.032648325	1
wormd20121123s147AF16PB1137rt23w03r05	2	AF16.30	AF16	23	11/23/12	5	30.3403551	145	266.815789	0.45194519	0.031501342	0.53859697	0.032648325	1
wormd20121123s147AF16PB1137rt23w03r06	2	AF16.30	AF16	23	11/23/12	6	31.40157959	241	396.02459	0.65386762	0.031501342	0.79429335	0.032648325	1
wormd20121123s147AF16PB1137rt23w03r07	2	AF16.30	AF16	23	11/23/12	7	32.46280408	213	358.24424	0.59570304	0.031501342	0.74138891	0.032648325	1
wormd20121123s147AF16PB1137rt23w03r08	2	AF16.30	AF16	23	11/23/12	8	33.52402857	175	353.320388	0.44093083	0.031501342	0.71179245	0.032648325	1
wormd20121123s147AF16PB1137rt23w03r10	2	AF16.30	AF16	23	11/23/12	10	35.64647755	256	421.976923	0.24498297	0.031501342	0.59074918	0.032648325	1
wormd20121123s147AF16PB1137rt23w03r11	2	AF16.30	AF16	23	11/23/12	11	36.70770204	217	284.357143	0.0811462	0.031501342	0.11067149	0.032648325	0
wormd20121123s147AF16PB1137rt23w03r12	2	AF16.30	AF16	23	11/23/12	12	37.76892653	293	298.793333	0.07389209	0.031501342	0.09159929	0.032648325	0
wormd20121123s147AF16PB1137rt23w03r13	2	AF16.30	AF16	23	11/23/12	13	38.83015102	276	299.731449	0.07814853	0.031501342	0.09374568	0.032648325	0
wormd20121123s147AF16PB1137rt23w03r14	2	AF16.30	AF16	23	11/23/12	14	39.89137551	292	135.043478	0.03150134	0.031501342	0.03264833	0.032648325	0
wormd20121123s147AF16PB1137rt23w03r15	2	AF16.30	AF16	23	11/23/12	15	40.9526	263	128.814126	0.07119077	0.031501342	0.07602474	0.032648325	0
wormd20121123s147AF16PB1137rt23w07r00	6	AF16.31	AF16	23	11/23/12	0	25.03423265	292	273.77592	0.5385996	0.095494144	0.72510565	0.097048746	1
wormd20121123s147AF16PB1137rt23w07r01	6	AF16.31	AF16	23	11/23/12	1	26.09545714	221	317.903509	0.59876096	0.095494144	0.67513052	0.097048746	1
wormd20121123s147AF16PB1137rt23w07r02	6	AF16.31	AF16	23	11/23/12	2	27.15668163	292	321.277592	0.57433919	0.095494144	0.70682701	0.097048746	1
wormd20121123s147AF16PB1137rt23w07r03	6	AF16.31	AF16	23	11/23/12	3	28.21790612	107	326.780702	0.31364475	0.095494144	0.63785809	0.097048746	1
wormd20121123s147AF16PB1137rt23w07r04	6	AF16.31	AF16	23	11/23/12	4	29.27913061	118	218.532787	0.30932252	0.095494144	0.41400309	0.097048746	1
wormd20121123s147AF16PB1137rt23w07r05	6	AF16.31	AF16	23	11/23/12	5	30.3403551	248	339.929412	0.54052259	0.095494144	0.77281333	0.097048746	1
wormd20121123s147AF16PB1137rt23w07r06	6	AF16.31	AF16	23	11/23/12	6	31.40157959	165	252.639053	0.29283297	0.095494144	0.53575688	0.097048746	1
wormd20121123s147AF16PB1137rt23w07r07	6	AF16.31	AF16	23	11/23/12	7	32.46280408	111	264.565217	0.24310427	0.095494144	0.43760417	0.097048746	1
wormd20121123s147AF16PB1137rt23w07r08	6	AF16.31	AF16	23	11/23/12	8	33.52402857	112	196.623932	0.18441236	0.095494144	0.43153383	0.097048746	1
wormd20121123s147AF16PB1137rt23w07r09	6	AF16.31	AF16	23	11/23/12	9	34.58525306	203	300.557143	0.09808274	0.095494144	0.26278972	0.097048746	1
wormd20121123s147AF16PB1137rt23w07r10	6	AF16.31	AF16	23	11/23/12	10	35.64647755	213	291.309091	0.10145845	0.095494144	0.19575869	0.097048746	1
wormd20121123s147AF16PB1137rt23w07r11	6	AF16.31	AF16	23	11/23/12	11	36.70770204	266	283.139194	0.11894862	0.095494144	0.19798827	0.097048746	1
wormd20121123s147AF16PB1137rt23w07r12	6	AF16.31	AF16	23	11/23/12	12	37.76892653	293	264.953333	0.11285079	0.095494144	0.11544814	0.097048746	0
wormd20121123s147AF16PB1137rt23w07r13	6	AF16.31	AF16	23	11/23/12	13	38.83015102	293	270.5	0.10061744	0.095494144	0.10160083	0.097048746	0
wormd20121123s147AF16PB1137rt23w07r14	6	AF16.31	AF16	23	11/23/12	14	39.89137551	293	289.93	0.10428514	0.095494144	0.10508164	0.097048746	0
wormd20121123s147AF16PB1137rt23w07r15	6	AF16.31	AF16	23	11/23/12	15	40.9526	293	292.583333	0.09549414	0.095494144	0.09704875	0.097048746	0
wormd20121123s147AF16PB1137rt23w08r00	7	AF16.32	AF16	23	11/23/12	0	25.03423265	283	367.610345	0.62607948	0.071934497	0.70848408	0.07651518	1
wormd20121123s147AF16PB1137rt23w08r01	7	AF16.32	AF16	23	11/23/12	1	26.09545714	229	388.763948	0.56950843	0.071934497	0.72169433	0.07651518	1
wormd20121123s147AF16PB1137rt23w08r02	7	AF16.32	AF16	23	11/23/12	2	27.15668163	234	381.082988	0.6038131	0.071934497	0.76485982	0.07651518	1
wormd20121123s147AF16PB1137rt23w08r03	7	AF16.32	AF16	23	11/23/12	3	28.21790612	231	385.97479	0.59076677	0.071934497	0.79021405	0.07651518	1
wormd20121123s147AF16PB1137rt23w08r04	7	AF16.32	AF16	23	11/23/12	4	29.27913061	288	388.891525	0.51575554	0.071934497	0.78849886	0.07651518	1
wormd20121123s147AF16PB1137rt23w08r05	7	AF16.32	AF16	23	11/23/12	5	30.3403551	164	374.767857	0.50412541	0.071934497	0.77923009	0.07651518	1
wormd20121123s147AF16PB1137rt23w08r06	7	AF16.32	AF16	23	11/23/12	6	31.40157959	115	397.791139	0.43699382	0.071934497	0.57778369	0.07651518	1
wormd20121123s147AF16PB1137rt23w08r07	7	AF16.32	AF16	23	11/23/12	7	32.46280408	249	414.757692	0.49503283	0.071934497	0.75065285	0.07651518	1
wormd20121123s147AF16PB1137rt23w08r09	7	AF16.32	AF16	23	11/23/12	9	34.58525306	289	327.89527	0.09092546	0.071934497	0.10157823	0.07651518	0
wormd20121123s147AF16PB1137rt23w08r10	7	AF16.32	AF16	23	11/23/12	10	35.64647755	291	340.895973	0.09855063	0.071934497	0.23652765	0.07651518	1
wormd20121123s147AF16PB1137rt23w08r11	7	AF16.32	AF16	23	11/23/12	11	36.70770204	286	390.819113	0.0719345	0.071934497	0.08221433	0.07651518	0
wormd20121123s147AF16PB1137rt23w08r12	7	AF16.32	AF16	23	11/23/12	12	37.76892653	283	405.114583	0.07349051	0.071934497	0.07653814	0.07651518	0
wormd20121123s147AF16PB1137rt23w08r13	7	AF16.32	AF16	23	11/23/12	13	38.83015102	285	393.020548	0.10284873	0.071934497	0.2954999	0.07651518	1
wormd20121123s147AF16PB1137rt23w08r14	7	AF16.32	AF16	23	11/23/12	14	39.89137551	293	407.176667	0.07758046	0.071934497	0.07651518	0.07651518	0
wormd20121123s147AF16PB1137rt23w08r15	7	AF16.32	AF16	23	11/23/12	15	40.9526	293	392.526667	0.08214949	0.071934497	0.08091578	0.07651518	0
wormd20121123s147AF16PB1137rt23w09r00	8	AF16.33	AF16	23	11/23/12	0	25.03423265	293	471.123333	0.5549329	0.054081122	0.5769823	0.055006161	1
wormd20121123s147AF16PB1137rt23w09r01	8	AF16.33	AF16	23	11/23/12	1	26.09545714	238	457.791837	0.59442235	0.054081122	0.64317798	0.055006161	1
wormd20121123s147AF16PB1137rt23w09r02	8	AF16.33	AF16	23	11/23/12	2	27.15668163	246	460.972112	0.46499279	0.054081122	0.74155603	0.055006161	1
wormd20121123s147AF16PB1137rt23w09r03	8	AF16.33	AF16	23	11/23/12	3	28.21790612	239	496.548	0.60361306	0.054081122	0.73683463	0.055006161	1
wormd20121123s147AF16PB1137rt23w09r04	8	AF16.33	AF16	23	11/23/12	4	29.27913061	221	499.37247	0.58162351	0.054081122	0.72065854	0.055006161	1
wormd20121123s147AF16PB1137rt23w09r07	8	AF16.33	AF16	23	11/23/12	7	32.46280408	178	444.114537	0.21800586	0.054081122	0.4145441	0.055006161	1
wormd20121123s147AF16PB1137rt23w09r08	8	AF16.33	AF16	23	11/23/12	8	33.52402857	199	460.3	0.05419615	0.054081122	0.09285779	0.055006161	0
wormd20121123s147AF16PB1137rt23w09r10	8	AF16.33	AF16	23	11/23/12	10	35.64647755	124	419.302083	0.06453635	0.054081122	0.1608688	0.055006161	1
wormd20121123s147AF16PB1137rt23w09r11	8	AF16.33	AF16	23	11/23/12	11	36.70770204	293	419.706667	0.05850364	0.054081122	0.07232972	0.055006161	0
wormd20121123s147AF16PB1137rt23w09r12	8	AF16.33	AF16	23	11/23/12	12	37.76892653	293	421.773333	0.05963209	0.054081122	0.06055579	0.055006161	0
wormd20121123s147AF16PB1137rt23w09r13	8	AF16.33	AF16	23	11/23/12	13	38.83015102	293	421.543333	0.05408112	0.054081122	0.05500616	0.055006161	0
wormd20121123s147AF16PB1137rt23w09r14	8	AF16.33	AF16	23	11/23/12	14	39.89137551	293	418.75	0.05648762	0.054081122	0.05710264	0.055006161	0
wormd20121123s147AF16PB1137rt23w13r00	12	AF16.34	AF16	23	11/23/12	0	25.03423265	248	324.243137	0.55672852	0.068101519	0.62300185	0.083573738	1
wormd20121123s147AF16PB1137rt23w13r01	12	AF16.34	AF16	23	11/23/12	1	26.09545714	255	295.759542	0.65501101	0.068101519	0.7585714	0.083573738	1
wormd20121123s147AF16PB1137rt23w13r02	12	AF16.34	AF16	23	11/23/12	2	27.15668163	287	329.741497	0.65745811	0.068101519	0.75221637	0.083573738	1
wormd20121123s147AF16PB1137rt23w13r03	12	AF16.34	AF16	23	11/23/12	3	28.21790612	279	320.926573	0.65632086	0.068101519	0.81150279	0.083573738	1
wormd20121123s147AF16PB1137rt23w13r04	12	AF16.34	AF16	23	11/23/12	4	29.27913061	264	318.98155	0.60469236	0.068101519	0.79871343	0.083573738	1
wormd20121123s147AF16PB1137rt23w13r05	12	AF16.34	AF16	23	11/23/12	5	30.3403551	125	312.84375	0.67849474	0.068101519	0.80080889	0.083573738	1
wormd20121123s147AF16PB1137rt23w13r06	12	AF16.34	AF16	23	11/23/12	6	31.40157959	225	324.36087	0.5064329	0.068101519	0.75911745	0.083573738	1
wormd20121123s147AF16PB1137rt23w13r08	12	AF16.34	AF16	23	11/23/12	8	33.52402857	212	290.266355	0.38634273	0.068101519	0.71102363	0.083573738	1
wormd20121123s147AF16PB1137rt23w13r10	12	AF16.34	AF16	23	11/23/12	10	35.64647755	293	257.796667	0.06810152	0.068101519	0.08422581	0.083573738	0
wormd20121123s147AF16PB1137rt23w13r11	12	AF16.34	AF16	23	11/23/12	11	36.70770204	288	246.877966	0.1002462	0.068101519	0.25067778	0.083573738	1
wormd20121123s147AF16PB1137rt23w13r12	12	AF16.34	AF16	23	11/23/12	12	37.76892653	288	244.688136	0.08025487	0.068101519	0.08507768	0.083573738	0
wormd20121123s147AF16PB1137rt23w13r13	12	AF16.34	AF16	23	11/23/12	13	38.83015102	283	249.682759	0.07762211	0.068101519	0.08357374	0.083573738	0
wormd20121123s147AF16PB1137rt23w13r14	12	AF16.34	AF16	23	11/23/12	14	39.89137551	229	255.120172	0.09107834	0.068101519	0.11497335	0.083573738	0
wormd20121123s147AF16PB1137rt23w13r15	12	AF16.34	AF16	23	11/23/12	15	40.9526	173	343.988889	0.09312499	0.068101519	0.15915415	0.083573738	1
wormd20121123s147AF16PB1137rt23w14r00	13	AF16.35	AF16	23	11/23/12	0	25.03423265	277	332.672535	0.68062111	0.063014921	0.76871808	0.065527014	1
wormd20121123s147AF16PB1137rt23w14r01	13	AF16.35	AF16	23	11/23/12	1	26.09545714	293	341.726667	0.59403398	0.063014921	0.80170627	0.065527014	1
wormd20121123s147AF16PB1137rt23w14r02	13	AF16.35	AF16	23	11/23/12	2	27.15668163	274	332.455516	0.58520854	0.063014921	0.77913319	0.065527014	1
wormd20121123s147AF16PB1137rt23w14r03	13	AF16.35	AF16	23	11/23/12	3	28.21790612	133	338.521429	0.6406157	0.063014921	0.81370767	0.065527014	1
wormd20121123s147AF16PB1137rt23w14r04	13	AF16.35	AF16	23	11/23/12	4	29.27913061	214	319.548387	0.51408085	0.063014921	0.78665463	0.065527014	1
wormd20121123s147AF16PB1137rt23w14r05	13	AF16.35	AF16	23	11/23/12	5	30.3403551	205	305.745614	0.63076926	0.063014921	0.81088285	0.065527014	1
wormd20121123s147AF16PB1137rt23w14r06	13	AF16.35	AF16	23	11/23/12	6	31.40157959	223	321.337719	0.67932254	0.063014921	0.83729997	0.065527014	1
wormd20121123s147AF16PB1137rt23w14r07	13	AF16.35	AF16	23	11/23/12	7	32.46280408	279	320.169014	0.49351514	0.063014921	0.76025423	0.065527014	1
wormd20121123s147AF16PB1137rt23w14r08	13	AF16.35	AF16	23	11/23/12	8	33.52402857	149	282.586667	0.65607618	0.063014921	0.82840702	0.065527014	1
wormd20121123s147AF16PB1137rt23w14r09	13	AF16.35	AF16	23	11/23/12	9	34.58525306	278	315	0.1167098	0.063014921	0.3997725	0.065527014	1
wormd20121123s147AF16PB1137rt23w14r10	13	AF16.35	AF16	23	11/23/12	10	35.64647755	223	317.240506	0.08146998	0.063014921	0.17206076	0.065527014	1
wormd20121123s147AF16PB1137rt23w14r11	13	AF16.35	AF16	23	11/23/12	11	36.70770204	222	244.426667	0.10366977	0.063014921	0.17293828	0.065527014	1
wormd20121123s147AF16PB1137rt23w14r12	13	AF16.35	AF16	23	11/23/12	12	37.76892653	292	275.996656	0.0809783	0.063014921	0.1463054	0.065527014	1
wormd20121123s147AF16PB1137rt23w14r13	13	AF16.35	AF16	23	11/23/12	13	38.83015102	293	259.776667	0.06301492	0.063014921	0.06552701	0.065527014	0
wormd20121123s147AF16PB1137rt23w14r14	13	AF16.35	AF16	23	11/23/12	14	39.89137551	293	258.23	0.06613562	0.063014921	0.06681779	0.065527014	0
wormd20121123s147AF16PB1137rt23w14r15	13	AF16.35	AF16	23	11/23/12	15	40.9526	293	264.373333	0.06702245	0.063014921	0.06927379	0.065527014	0
wormd20121123s147AF16PB1137rt23w15r00	14	AF16.36	AF16	23	11/23/12	0	25.03423265	281	384.034722	0.58327139	0.069205948	0.68569863	0.070827575	1
wormd20121123s147AF16PB1137rt23w15r01	14	AF16.36	AF16	23	11/23/12	1	26.09545714	281	385.333333	0.6247357	0.069205948	0.75438602	0.070827575	1
wormd20121123s147AF16PB1137rt23w15r02	14	AF16.36	AF16	23	11/23/12	2	27.15668163	121	304.472	0.32184056	0.069205948	0.51573412	0.070827575	1
wormd20121123s147AF16PB1137rt23w15r04	14	AF16.36	AF16	23	11/23/12	4	29.27913061	131	393.819549	0.4633058	0.069205948	0.67176707	0.070827575	1
wormd20121123s147AF16PB1137rt23w15r06	14	AF16.36	AF16	23	11/23/12	6	31.40157959	120	365.409449	0.39258967	0.069205948	0.62449506	0.070827575	1
wormd20121123s147AF16PB1137rt23w15r07	14	AF16.36	AF16	23	11/23/12	7	32.46280408	120	340.874016	0.08784136	0.069205948	0.20301975	0.070827575	1
wormd20121123s147AF16PB1137rt23w15r08	14	AF16.36	AF16	23	11/23/12	8	33.52402857	100	319.038095	0.08629787	0.069205948	0.18168934	0.070827575	1
wormd20121123s147AF16PB1137rt23w15r09	14	AF16.36	AF16	23	11/23/12	9	34.58525306	293	334.71	0.0774991	0.069205948	0.16941101	0.070827575	1
wormd20121123s147AF16PB1137rt23w15r12	14	AF16.36	AF16	23	11/23/12	12	37.76892653	281	311.09375	0.08274533	0.069205948	0.10108391	0.070827575	0
wormd20121123s147AF16PB1137rt23w15r13	14	AF16.36	AF16	23	11/23/12	13	38.83015102	293	317.2	0.07121475	0.069205948	0.07329835	0.070827575	0
wormd20121123s147AF16PB1137rt23w15r14	14	AF16.36	AF16	23	11/23/12	14	39.89137551	293	324.026667	0.06934473	0.069205948	0.07111087	0.070827575	0
wormd20121123s147AF16PB1137rt23w15r15	14	AF16.36	AF16	23	11/23/12	15	40.9526	293	321.556667	0.06920595	0.069205948	0.07082758	0.070827575	0
wormd20121126s219HK104AF16rt23w04r00	3	AF16.37	AF16	23	11/26/12	0	25.03423265	284	555.718213	0.47882828	0.046135481	0.70414044	0.066190674	1
wormd20121126s219HK104AF16rt23w04r01	3	AF16.37	AF16	23	11/26/12	1	26.09545714	246	608.96	0.53533851	0.046135481	0.62410375	0.066190674	1
wormd20121126s219HK104AF16rt23w04r02	3	AF16.37	AF16	23	11/26/12	2	27.15668163	188	585.902564	0.50961162	0.046135481	0.64380398	0.066190674	1
wormd20121126s219HK104AF16rt23w04r04	3	AF16.37	AF16	23	11/26/12	4	29.27913061	202	567.08134	0.51618102	0.046135481	0.72721647	0.066190674	1
wormd20121126s219HK104AF16rt23w04r05	3	AF16.37	AF16	23	11/26/12	5	30.3403551	169	556.096591	0.46151482	0.046135481	0.71407119	0.066190674	1
wormd20121126s219HK104AF16rt23w04r06	3	AF16.37	AF16	23	11/26/12	6	31.40157959	270	557.093863	0.2726757	0.046135481	0.64471312	0.066190674	1
wormd20121126s219HK104AF16rt23w04r08	3	AF16.37	AF16	23	11/26/12	8	33.52402857	116	571.130178	0.30558381	0.046135481	0.37588278	0.066190674	1
wormd20121126s219HK104AF16rt23w04r09	3	AF16.37	AF16	23	11/26/12	9	34.58525306	165	580.076923	0.40742772	0.046135481	0.49679999	0.066190674	1
wormd20121126s219HK104AF16rt23w04r10	3	AF16.37	AF16	23	11/26/12	10	35.64647755	120	621.799145	0.04613548	0.046135481	0.10270632	0.066190674	0
wormd20121126s219HK104AF16rt23w04r13	3	AF16.37	AF16	23	11/26/12	13	38.83015102	285	549.565217	0.0651978	0.046135481	0.06619067	0.066190674	0
wormd20121126s219HK104AF16rt23w04r15	3	AF16.37	AF16	23	11/26/12	15	40.9526	274	523.308475	0.07139469	0.046135481	0.07199794	0.066190674	0
wormd20121126s219HK104AF16rt23w05r00	4	AF16.38	AF16	23	11/26/12	0	25.03423265	188	638.033333	0.42351473	0.080182126	0.4898819	0.081080183	1
wormd20121126s219HK104AF16rt23w05r01	4	AF16.38	AF16	23	11/26/12	1	26.09545714	123	683.477612	0.31964198	0.080182126	0.53283051	0.081080183	1
wormd20121126s219HK104AF16rt23w05r06	4	AF16.38	AF16	23	11/26/12	6	31.40157959	134	736.990291	0.31670817	0.080182126	0.57100784	0.081080183	1
wormd20121126s219HK104AF16rt23w05r09	4	AF16.38	AF16	23	11/26/12	9	34.58525306	293	698.836667	0.10939426	0.080182126	0.3055863	0.081080183	1
wormd20121126s219HK104AF16rt23w05r10	4	AF16.38	AF16	23	11/26/12	10	35.64647755	293	712.863333	0.09035838	0.080182126	0.19992711	0.081080183	1
wormd20121126s219HK104AF16rt23w05r11	4	AF16.38	AF16	23	11/26/12	11	36.70770204	293	667.486667	0.08284503	0.080182126	0.13906355	0.081080183	0
wormd20121126s219HK104AF16rt23w05r12	4	AF16.38	AF16	23	11/26/12	12	37.76892653	293	693.456667	0.08018213	0.080182126	0.08108018	0.081080183	0
wormd20121126s219HK104AF16rt23w05r13	4	AF16.38	AF16	23	11/26/12	13	38.83015102	293	694.89	0.08213538	0.080182126	0.08314534	0.081080183	0
wormd20121126s219HK104AF16rt23w05r14	4	AF16.38	AF16	23	11/26/12	14	39.89137551	293	713.65	0.08522116	0.080182126	0.08580875	0.081080183	0
wormd20121126s219HK104AF16rt23w05r15	4	AF16.38	AF16	23	11/26/12	15	40.9526	293	701.846667	0.09784136	0.080182126	0.0973899	0.081080183	0
wormd20121126s219HK104AF16rt23w06r00	5	AF16.39	AF16	23	11/26/12	0	25.03423265	158	679.36	0.38251331	0.074906568	0.64736606	0.080892244	1
wormd20121126s219HK104AF16rt23w06r04	5	AF16.39	AF16	23	11/26/12	4	29.27913061	114	138.201342	0.10976093	0.074906568	0.11096194	0.080892244	0
wormd20121126s219HK104AF16rt23w06r06	5	AF16.39	AF16	23	11/26/12	6	31.40157959	116	107.823529	0.08093721	0.074906568	0.08089224	0.080892244	0
wormd20121126s219HK104AF16rt23w06r09	5	AF16.39	AF16	23	11/26/12	9	34.58525306	110	627.385965	0.07490657	0.074906568	0.08499559	0.080892244	0
wormd20121126s219HK104AF16rt23w10r00	9	AF16.40	AF16	23	11/26/12	0	25.03423265	246	624.119231	0.46468012	0.065204702	0.52762922	0.065556048	1
wormd20121126s219HK104AF16rt23w10r03	9	AF16.40	AF16	23	11/26/12	3	28.21790612	287	651.078231	0.54006378	0.065204702	0.66487737	0.065556048	1
wormd20121126s219HK104AF16rt23w10r05	9	AF16.40	AF16	23	11/26/12	5	30.3403551	175	457.438503	0.20948093	0.065204702	0.27721609	0.065556048	1
wormd20121126s219HK104AF16rt23w10r06	9	AF16.40	AF16	23	11/26/12	6	31.40157959	141	542.370192	0.2967506	0.065204702	0.39005586	0.065556048	1
wormd20121126s219HK104AF16rt23w10r07	9	AF16.40	AF16	23	11/26/12	7	32.46280408	238	525.078125	0.2608348	0.065204702	0.36446724	0.065556048	1
wormd20121126s219HK104AF16rt23w10r08	9	AF16.40	AF16	23	11/26/12	8	33.52402857	233	623.668	0.29634248	0.065204702	0.55489869	0.065556048	1
wormd20121126s219HK104AF16rt23w10r09	9	AF16.40	AF16	23	11/26/12	9	34.58525306	293	643.036667	0.17091538	0.065204702	0.48294184	0.065556048	1
wormd20121126s219HK104AF16rt23w10r10	9	AF16.40	AF16	23	11/26/12	10	35.64647755	293	654.69	0.07642337	0.065204702	0.19782292	0.065556048	1
wormd20121126s219HK104AF16rt23w10r11	9	AF16.40	AF16	23	11/26/12	11	36.70770204	293	586.443333	0.07449035	0.065204702	0.16257489	0.065556048	1
wormd20121126s219HK104AF16rt23w10r12	9	AF16.40	AF16	23	11/26/12	12	37.76892653	293	592.916667	0.06791794	0.065204702	0.09468276	0.065556048	0
wormd20121126s219HK104AF16rt23w10r13	9	AF16.40	AF16	23	11/26/12	13	38.83015102	293	595.646667	0.06987428	0.065204702	0.07179237	0.065556048	0
wormd20121126s219HK104AF16rt23w10r14	9	AF16.40	AF16	23	11/26/12	14	39.89137551	293	594.133333	0.0652047	0.065204702	0.06555605	0.065556048	0
wormd20121126s219HK104AF16rt23w10r15	9	AF16.40	AF16	23	11/26/12	15	40.9526	293	582.51	0.06892384	0.065204702	0.07055311	0.065556048	0
wormd20121126s219HK104AF16rt23w11r00	10	AF16.41	AF16	23	11/26/12	0	25.03423265	267	573.626335	0.47661885	0.075031408	0.52179936	0.078694525	1
wormd20121126s219HK104AF16rt23w11r04	10	AF16.41	AF16	23	11/26/12	4	29.27913061	198	573.872247	0.39521705	0.075031408	0.51682163	0.078694525	1
wormd20121126s219HK104AF16rt23w11r05	10	AF16.41	AF16	23	11/26/12	5	30.3403551	227	597.82	0.30598997	0.075031408	0.4942223	0.078694525	1
wormd20121126s219HK104AF16rt23w11r06	10	AF16.41	AF16	23	11/26/12	6	31.40157959	117	603.639344	0.34116051	0.075031408	0.52130556	0.078694525	1
wormd20121126s219HK104AF16rt23w11r07	10	AF16.41	AF16	23	11/26/12	7	32.46280408	116	611.95122	0.25181222	0.075031408	0.37793969	0.078694525	1
wormd20121126s219HK104AF16rt23w11r09	10	AF16.41	AF16	23	11/26/12	9	34.58525306	113	583.183908	0.08342705	0.075031408	0.19292014	0.078694525	1
wormd20121126s219HK104AF16rt23w11r10	10	AF16.41	AF16	23	11/26/12	10	35.64647755	293	611.86	0.07503141	0.075031408	0.13542311	0.078694525	0
wormd20121126s219HK104AF16rt23w11r11	10	AF16.41	AF16	23	11/26/12	11	36.70770204	293	515.706667	0.08616188	0.075031408	0.08746767	0.078694525	0
wormd20121126s219HK104AF16rt23w11r12	10	AF16.41	AF16	23	11/26/12	12	37.76892653	293	506.33	0.08451996	0.075031408	0.09049225	0.078694525	0
wormd20121126s219HK104AF16rt23w11r13	10	AF16.41	AF16	23	11/26/12	13	38.83015102	293	499.79	0.08303977	0.075031408	0.0839903	0.078694525	0
wormd20121126s219HK104AF16rt23w11r14	10	AF16.41	AF16	23	11/26/12	14	39.89137551	293	497.813333	0.07912966	0.075031408	0.07889594	0.078694525	0
wormd20121126s219HK104AF16rt23w11r15	10	AF16.41	AF16	23	11/26/12	15	40.9526	293	492.496667	0.07705395	0.075031408	0.07869452	0.078694525	0
wormd20121126s219HK104AF16rt23w12r00	11	AF16.42	AF16	23	11/26/12	0	25.03423265	278	646.585034	0.18757318	0.080807187	0.528118	0.081622643	1
wormd20121126s219HK104AF16rt23w12r01	11	AF16.42	AF16	23	11/26/12	1	26.09545714	199	716.071698	0.20454248	0.080807187	0.5336612	0.081622643	1
wormd20121126s219HK104AF16rt23w12r04	11	AF16.42	AF16	23	11/26/12	4	29.27913061	157	704.1	0.46613223	0.080807187	0.5505476	0.081622643	1
wormd20121126s219HK104AF16rt23w12r12	11	AF16.42	AF16	23	11/26/12	12	37.76892653	293	761.166667	0.08265735	0.080807187	0.0830167	0.081622643	0
wormd20121126s219HK104AF16rt23w12r13	11	AF16.42	AF16	23	11/26/12	13	38.83015102	290	766.791246	0.08266062	0.080807187	0.08361173	0.081622643	0
wormd20121126s219HK104AF16rt23w12r14	11	AF16.42	AF16	23	11/26/12	14	39.89137551	293	752.393333	0.0824965	0.080807187	0.08275474	0.081622643	0
wormd20121126s219HK104AF16rt23w12r15	11	AF16.42	AF16	23	11/26/12	15	40.9526	293	760	0.08080719	0.080807187	0.08162264	0.081622643	0
wormd20121126s219HK104AF16rt23w16r00	15	AF16.43	AF16	23	11/26/12	0	25.03423265	291	596.767677	0.40909075	0.017183016	0.59423453	0.020915906	1
wormd20121126s219HK104AF16rt23w16r02	15	AF16.43	AF16	23	11/26/12	2	27.15668163	206	624.312217	0.46580883	0.017183016	0.63029673	0.020915906	1
wormd20121126s219HK104AF16rt23w16r03	15	AF16.43	AF16	23	11/26/12	3	28.21790612	188	480.620513	0.301624	0.017183016	0.40060151	0.020915906	1
wormd20121126s219HK104AF16rt23w16r04	15	AF16.43	AF16	23	11/26/12	4	29.27913061	210	235.327189	0.11582958	0.017183016	0.15493487	0.020915906	1
wormd20121126s219HK104AF16rt23w16r05	15	AF16.43	AF16	23	11/26/12	5	30.3403551	220	128.792952	0.01718302	0.017183016	0.02091591	0.020915906	0
wormd20121126s219HK104AF16rt23w16r06	15	AF16.43	AF16	23	11/26/12	6	31.40157959	219	280.395556	0.1371668	0.017183016	0.14987149	0.020915906	1
wormd20121126s219HK104AF16rt23w16r09	15	AF16.43	AF16	23	11/26/12	9	34.58525306	168	695.814346	0.18298105	0.017183016	0.47363675	0.020915906	1
wormd20121126s219HK104AF16rt23w16r10	15	AF16.43	AF16	23	11/26/12	10	35.64647755	293	724.22	0.08779712	0.017183016	0.14844896	0.020915906	1
wormd20121126s219HK104AF16rt23w16r11	15	AF16.43	AF16	23	11/26/12	11	36.70770204	293	718.096667	0.08547413	0.017183016	0.13921279	0.020915906	0
wormd20121126s219HK104AF16rt23w16r12	15	AF16.43	AF16	23	11/26/12	12	37.76892653	293	642.896667	0.09011262	0.017183016	0.12663475	0.020915906	0
wormd20121126s219HK104AF16rt23w16r13	15	AF16.43	AF16	23	11/26/12	13	38.83015102	293	637.57	0.08963271	0.017183016	0.09063846	0.020915906	0
wormd20121126s219HK104AF16rt23w16r14	15	AF16.43	AF16	23	11/26/12	14	39.89137551	293	634.823333	0.08755319	0.017183016	0.08769413	0.020915906	0
wormd20121126s219HK104AF16rt23w16r15	15	AF16.43	AF16	23	11/26/12	15	40.9526	293	623.206667	0.09106541	0.017183016	0.09191265	0.020915906	0
wormd20121126s219HK104AF16rt23w17r00	16	AF16.44	AF16	23	11/26/12	0	25.03423265	260	440.2397	0.22377252	0.075800793	0.44717522	0.077372945	1
wormd20121126s219HK104AF16rt23w17r01	16	AF16.44	AF16	23	11/26/12	1	26.09545714	293	594.156667	0.35608367	0.075800793	0.59202753	0.077372945	1
wormd20121126s219HK104AF16rt23w17r04	16	AF16.44	AF16	23	11/26/12	4	29.27913061	157	625.123348	0.44079857	0.075800793	0.59529463	0.077372945	1
wormd20121126s219HK104AF16rt23w17r06	16	AF16.44	AF16	23	11/26/12	6	31.40157959	115	595.592105	0.34681481	0.075800793	0.43226546	0.077372945	1
wormd20121126s219HK104AF16rt23w17r07	16	AF16.44	AF16	23	11/26/12	7	32.46280408	124	660.804233	0.38387122	0.075800793	0.52482922	0.077372945	1
wormd20121126s219HK104AF16rt23w17r10	16	AF16.44	AF16	23	11/26/12	10	35.64647755	188	592.604878	0.14322549	0.075800793	0.44788678	0.077372945	1
wormd20121126s219HK104AF16rt23w17r11	16	AF16.44	AF16	23	11/26/12	11	36.70770204	293	678.52	0.07580079	0.075800793	0.13522619	0.077372945	0
wormd20121126s219HK104AF16rt23w17r12	16	AF16.44	AF16	23	11/26/12	12	37.76892653	293	619.976667	0.08153968	0.075800793	0.10074832	0.077372945	0
wormd20121126s219HK104AF16rt23w17r13	16	AF16.44	AF16	23	11/26/12	13	38.83015102	293	609.76	0.08405237	0.075800793	0.08467252	0.077372945	0
wormd20121126s219HK104AF16rt23w17r14	16	AF16.44	AF16	23	11/26/12	14	39.89137551	293	608.796667	0.07694921	0.075800793	0.07737294	0.077372945	0
wormd20121126s219HK104AF16rt23w17r15	16	AF16.44	AF16	23	11/26/12	15	40.9526	293	610.843333	0.08137192	0.075800793	0.0817752	0.077372945	0
wormd20121126s219HK104AF16rt23w18r00	17	AF16.45	AF16	23	11/26/12	0	25.03423265	292	549.401338	0.40850062	0.066231438	0.59976908	0.067459714	1
wormd20121126s219HK104AF16rt23w18r01	17	AF16.45	AF16	23	11/26/12	1	26.09545714	248	587.482353	0.41461917	0.066231438	0.57362842	0.067459714	1
wormd20121126s219HK104AF16rt23w18r02	17	AF16.45	AF16	23	11/26/12	2	27.15668163	293	545.423333	0.40255846	0.066231438	0.68810486	0.067459714	1
wormd20121126s219HK104AF16rt23w18r03	17	AF16.45	AF16	23	11/26/12	3	28.21790612	271	531.715827	0.49412745	0.066231438	0.63002712	0.067459714	1
wormd20121126s219HK104AF16rt23w18r04	17	AF16.45	AF16	23	11/26/12	4	29.27913061	293	607.46	0.34273798	0.066231438	0.68716312	0.067459714	1
wormd20121126s219HK104AF16rt23w18r05	17	AF16.45	AF16	23	11/26/12	5	30.3403551	293	606.98	0.4024358	0.066231438	0.63153607	0.067459714	1
wormd20121126s219HK104AF16rt23w18r06	17	AF16.45	AF16	23	11/26/12	6	31.40157959	293	503.83	0.09748798	0.066231438	0.19267141	0.067459714	1
wormd20121126s219HK104AF16rt23w18r07	17	AF16.45	AF16	23	11/26/12	7	32.46280408	200	599.418502	0.46023639	0.066231438	0.64758553	0.067459714	1
wormd20121126s219HK104AF16rt23w18r08	17	AF16.45	AF16	23	11/26/12	8	33.52402857	276	526.392226	0.53850373	0.066231438	0.62656375	0.067459714	1
wormd20121126s219HK104AF16rt23w18r09	17	AF16.45	AF16	23	11/26/12	9	34.58525306	107	497.81982	0.09240305	0.066231438	0.18587881	0.067459714	1
wormd20121126s219HK104AF16rt23w18r10	17	AF16.45	AF16	23	11/26/12	10	35.64647755	293	461.336667	0.08236517	0.066231438	0.15453717	0.067459714	1
wormd20121126s219HK104AF16rt23w18r11	17	AF16.45	AF16	23	11/26/12	11	36.70770204	293	448.936667	0.07461212	0.066231438	0.09456117	0.067459714	0
wormd20121126s219HK104AF16rt23w18r12	17	AF16.45	AF16	23	11/26/12	12	37.76892653	293	490.43	0.06623144	0.066231438	0.06745971	0.067459714	0
wormd20121126s219HK104AF16rt23w18r13	17	AF16.45	AF16	23	11/26/12	13	38.83015102	290	512.323232	0.07365363	0.066231438	0.07462226	0.067459714	0
wormd20121126s219HK104AF16rt23w18r14	17	AF16.45	AF16	23	11/26/12	14	39.89137551	293	504.85	0.07591249	0.066231438	0.07637823	0.067459714	0
wormd20121126s219HK104AF16rt23w18r15	17	AF16.45	AF16	23	11/26/12	15	40.9526	290	512.131313	0.08598769	0.066231438	0.08740036	0.067459714	0
wormd20121129s268charactercharacterrt23w01r00	3	AF16.46	AF16	23	11/29/12	0	25.03423265	293	477.686667	0.47167859	0.076294991	0.69838039	0.076767845	1
wormd20121129s268charactercharacterrt23w01r01	3	AF16.46	AF16	23	11/29/12	1	26.09545714	224	461.878788	0.5912226	0.076294991	0.63254513	0.076767845	1
wormd20121129s268charactercharacterrt23w01r02	3	AF16.46	AF16	23	11/29/12	2	27.15668163	276	465.212014	0.57040791	0.076294991	0.6694845	0.076767845	1
wormd20121129s268charactercharacterrt23w01r03	3	AF16.46	AF16	23	11/29/12	3	28.21790612	285	458.407534	0.6066757	0.076294991	0.71385261	0.076767845	1
wormd20121129s268charactercharacterrt23w01r04	3	AF16.46	AF16	23	11/29/12	4	29.27913061	143	403.858108	0.32609349	0.076294991	0.62670238	0.076767845	1
wormd20121129s268charactercharacterrt23w01r05	3	AF16.46	AF16	23	11/29/12	5	30.3403551	109	354.657658	0.43222295	0.076294991	0.49080053	0.076767845	1
wormd20121129s268charactercharacterrt23w01r06	3	AF16.46	AF16	23	11/29/12	6	31.40157959	273	491.567857	0.46226291	0.076294991	0.6804363	0.076767845	1
wormd20121129s268charactercharacterrt23w01r07	3	AF16.46	AF16	23	11/29/12	7	32.46280408	154	508.695652	0.59017702	0.076294991	0.67856493	0.076767845	1
wormd20121129s268charactercharacterrt23w01r08	3	AF16.46	AF16	23	11/29/12	8	33.52402857	139	397.153846	0.27791799	0.076294991	0.53712389	0.076767845	1
wormd20121129s268charactercharacterrt23w01r09	3	AF16.46	AF16	23	11/29/12	9	34.58525306	201	411.649038	0.30637917	0.076294991	0.64497529	0.076767845	1
wormd20121129s268charactercharacterrt23w01r11	3	AF16.46	AF16	23	11/29/12	11	36.70770204	227	433.395652	0.14304827	0.076294991	0.59672884	0.076767845	1
wormd20121129s268charactercharacterrt23w01r12	3	AF16.46	AF16	23	11/29/12	12	37.76892653	147	392.89375	0.08211012	0.076294991	0.20551204	0.076767845	1
wormd20121129s268charactercharacterrt23w01r13	3	AF16.46	AF16	23	11/29/12	13	38.83015102	293	412.503333	0.07629499	0.076294991	0.07676785	0.076767845	0
wormd20121129s268charactercharacterrt23w01r14	3	AF16.46	AF16	23	11/29/12	14	39.89137551	293	405.213333	0.08006144	0.076294991	0.0780839	0.076767845	0
wormd20121129s268charactercharacterrt23w01r15	3	AF16.46	AF16	23	11/29/12	15	40.9526	293	425.526667	0.08363011	0.076294991	0.08284306	0.076767845	0
wormd20121129s268charactercharacterrt23w02r00	4	AF16.47	AF16	23	11/29/12	0	25.03423265	293	440.256667	0.47729002	0.067329756	0.65319012	0.072962062	1
wormd20121129s268charactercharacterrt23w02r01	4	AF16.47	AF16	23	11/29/12	1	26.09545714	255	398.570423	0.60325711	0.067329756	0.75087196	0.072962062	1
wormd20121129s268charactercharacterrt23w02r02	4	AF16.47	AF16	23	11/29/12	2	27.15668163	285	409.530822	0.60214311	0.067329756	0.73005976	0.072962062	1
wormd20121129s268charactercharacterrt23w02r03	4	AF16.47	AF16	23	11/29/12	3	28.21790612	253	417.154386	0.60367033	0.067329756	0.78299407	0.072962062	1
wormd20121129s268charactercharacterrt23w02r04	4	AF16.47	AF16	23	11/29/12	4	29.27913061	280	427.181185	0.62150432	0.067329756	0.79487024	0.072962062	1
wormd20121129s268charactercharacterrt23w02r05	4	AF16.47	AF16	23	11/29/12	5	30.3403551	257	427.892857	0.61309157	0.067329756	0.77974132	0.072962062	1
wormd20121129s268charactercharacterrt23w02r06	4	AF16.47	AF16	23	11/29/12	6	31.40157959	261	393.797153	0.64970851	0.067329756	0.81029286	0.072962062	1
wormd20121129s268charactercharacterrt23w02r07	4	AF16.47	AF16	23	11/29/12	7	32.46280408	131	428.807407	0.53733262	0.067329756	0.70092215	0.072962062	1
wormd20121129s268charactercharacterrt23w02r09	4	AF16.47	AF16	23	11/29/12	9	34.58525306	188	477.14359	0.39485561	0.067329756	0.55550993	0.072962062	1
wormd20121129s268charactercharacterrt23w02r12	4	AF16.47	AF16	23	11/29/12	12	37.76892653	290	365.218855	0.08694582	0.067329756	0.17655061	0.072962062	1
wormd20121129s268charactercharacterrt23w02r13	4	AF16.47	AF16	23	11/29/12	13	38.83015102	251	295.212598	0.06732976	0.067329756	0.07352766	0.072962062	0
wormd20121129s268charactercharacterrt23w02r14	4	AF16.47	AF16	23	11/29/12	14	39.89137551	278	338.529825	0.07414469	0.067329756	0.07296206	0.072962062	0
wormd20121129s268charactercharacterrt23w02r15	4	AF16.47	AF16	23	11/29/12	15	40.9526	244	356.768924	0.07781227	0.067329756	0.07846688	0.072962062	0
wormd20121129s268charactercharacterrt23w03r00	5	AF16.48	AF16	23	11/29/12	0	25.03423265	259	422.387218	0.41885186	0.068277833	0.48355082	0.067547072	1
wormd20121129s268charactercharacterrt23w03r01	5	AF16.48	AF16	23	11/29/12	1	26.09545714	154	406.176101	0.31867177	0.068277833	0.48567317	0.067547072	1
wormd20121129s268charactercharacterrt23w03r02	5	AF16.48	AF16	23	11/29/12	2	27.15668163	261	434.753731	0.34541981	0.068277833	0.62734226	0.067547072	1
wormd20121129s268charactercharacterrt23w03r03	5	AF16.48	AF16	23	11/29/12	3	28.21790612	282	471	0.51470725	0.068277833	0.66739859	0.067547072	1
wormd20121129s268charactercharacterrt23w03r04	5	AF16.48	AF16	23	11/29/12	4	29.27913061	240	451.643725	0.38711704	0.068277833	0.6810458	0.067547072	1
wormd20121129s268charactercharacterrt23w03r05	5	AF16.48	AF16	23	11/29/12	5	30.3403551	233	263.75	0.17433117	0.068277833	0.26329531	0.067547072	1
wormd20121129s268charactercharacterrt23w03r06	5	AF16.48	AF16	23	11/29/12	6	31.40157959	272	452.487455	0.14298761	0.068277833	0.45965317	0.067547072	1
wormd20121129s268charactercharacterrt23w03r07	5	AF16.48	AF16	23	11/29/12	7	32.46280408	290	490.952862	0.1189922	0.068277833	0.12629221	0.067547072	0
wormd20121129s268charactercharacterrt23w03r08	5	AF16.48	AF16	23	11/29/12	8	33.52402857	289	400.158784	0.09589404	0.068277833	0.13705714	0.067547072	0
wormd20121129s268charactercharacterrt23w03r09	5	AF16.48	AF16	23	11/29/12	9	34.58525306	293	431.053333	0.09733269	0.068277833	0.10413238	0.067547072	0
wormd20121129s268charactercharacterrt23w03r10	5	AF16.48	AF16	23	11/29/12	10	35.64647755	293	546.866667	0.0916085	0.068277833	0.09133782	0.067547072	0
wormd20121129s268charactercharacterrt23w03r11	5	AF16.48	AF16	23	11/29/12	11	36.70770204	293	505.52	0.0916914	0.068277833	0.15441871	0.067547072	1
wormd20121129s268charactercharacterrt23w03r12	5	AF16.48	AF16	23	11/29/12	12	37.76892653	293	487.306667	0.09316064	0.068277833	0.11997592	0.067547072	0
wormd20121129s268charactercharacterrt23w03r13	5	AF16.48	AF16	23	11/29/12	13	38.83015102	293	450.25	0.08633715	0.068277833	0.08889557	0.067547072	0
wormd20121129s268charactercharacterrt23w03r14	5	AF16.48	AF16	23	11/29/12	14	39.89137551	293	432.806667	0.07657285	0.068277833	0.07647124	0.067547072	0
wormd20121129s268charactercharacterrt23w03r15	5	AF16.48	AF16	23	11/29/12	15	40.9526	293	425.776667	0.06827783	0.068277833	0.06754707	0.067547072	0
wormd20121129s268charactercharacterrt23w04r00	9	AF16.49	AF16	23	11/29/12	0	25.03423265	289	413.114865	0.5730113	0.054825616	0.61398272	0.05491193	1
wormd20121129s268charactercharacterrt23w04r01	9	AF16.49	AF16	23	11/29/12	1	26.09545714	200	386.164251	0.55234669	0.054825616	0.63263995	0.05491193	1
wormd20121129s268charactercharacterrt23w04r02	9	AF16.49	AF16	23	11/29/12	2	27.15668163	234	418.698745	0.54682827	0.054825616	0.65015762	0.05491193	1
wormd20121129s268charactercharacterrt23w04r03	9	AF16.49	AF16	23	11/29/12	3	28.21790612	198	350.876238	0.44362785	0.054825616	0.52882019	0.05491193	1
wormd20121129s268charactercharacterrt23w04r04	9	AF16.49	AF16	23	11/29/12	4	29.27913061	243	411.36	0.60439833	0.054825616	0.73638603	0.05491193	1
wormd20121129s268charactercharacterrt23w04r05	9	AF16.49	AF16	23	11/29/12	5	30.3403551	278	426.859649	0.57817326	0.054825616	0.74048273	0.05491193	1
wormd20121129s268charactercharacterrt23w04r06	9	AF16.49	AF16	23	11/29/12	6	31.40157959	238	418.483607	0.57345338	0.054825616	0.75401448	0.05491193	1
wormd20121129s268charactercharacterrt23w04r07	9	AF16.49	AF16	23	11/29/12	7	32.46280408	204	442.805687	0.37809938	0.054825616	0.58527669	0.05491193	1
wormd20121129s268charactercharacterrt23w04r08	9	AF16.49	AF16	23	11/29/12	8	33.52402857	219	439.230088	0.54009805	0.054825616	0.5994507	0.05491193	1
wormd20121129s268charactercharacterrt23w04r09	9	AF16.49	AF16	23	11/29/12	9	34.58525306	254	414.611538	0.09937952	0.054825616	0.1090799	0.05491193	0
wormd20121129s268charactercharacterrt23w04r10	9	AF16.49	AF16	23	11/29/12	10	35.64647755	169	509.606936	0.07795358	0.054825616	0.20099612	0.05491193	1
wormd20121129s268charactercharacterrt23w04r12	9	AF16.49	AF16	23	11/29/12	12	37.76892653	293	402.13	0.0575199	0.054825616	0.07243556	0.05491193	0
wormd20121129s268charactercharacterrt23w04r13	9	AF16.49	AF16	23	11/29/12	13	38.83015102	293	406.273333	0.05482562	0.054825616	0.05491193	0.05491193	0
wormd20121129s268charactercharacterrt23w04r14	9	AF16.49	AF16	23	11/29/12	14	39.89137551	293	400.93	0.06124278	0.054825616	0.06087388	0.05491193	0
wormd20121129s268charactercharacterrt23w04r15	9	AF16.49	AF16	23	11/29/12	15	40.9526	293	392.02	0.0622418	0.054825616	0.06225444	0.05491193	0
wormd20121129s268charactercharacterrt23w05r00	10	AF16.50	AF16	23	11/29/12	0	25.03423265	293	390.836667	0.42166575	0.059401876	0.66982466	0.058181311	1
wormd20121129s268charactercharacterrt23w05r01	10	AF16.50	AF16	23	11/29/12	1	26.09545714	293	371.693333	0.5196337	0.059401876	0.61090007	0.058181311	1
wormd20121129s268charactercharacterrt23w05r02	10	AF16.50	AF16	23	11/29/12	2	27.15668163	293	362.24	0.50977693	0.059401876	0.62985069	0.058181311	1
wormd20121129s268charactercharacterrt23w05r03	10	AF16.50	AF16	23	11/29/12	3	28.21790612	282	356.217993	0.59912943	0.059401876	0.69307302	0.058181311	1
wormd20121129s268charactercharacterrt23w05r04	10	AF16.50	AF16	23	11/29/12	4	29.27913061	176	282.360656	0.4173085	0.059401876	0.4533212	0.058181311	1
wormd20121129s268charactercharacterrt23w05r05	10	AF16.50	AF16	23	11/29/12	5	30.3403551	259	348.189394	0.54869464	0.059401876	0.69504886	0.058181311	1
wormd20121129s268charactercharacterrt23w05r06	10	AF16.50	AF16	23	11/29/12	6	31.40157959	194	190.643216	0.18599061	0.059401876	0.23878657	0.058181311	1
wormd20121129s268charactercharacterrt23w05r07	10	AF16.50	AF16	23	11/29/12	7	32.46280408	213	345.395455	0.29428936	0.059401876	0.45752406	0.058181311	1
wormd20121129s268charactercharacterrt23w05r08	10	AF16.50	AF16	23	11/29/12	8	33.52402857	247	422.649606	0.34846074	0.059401876	0.58099888	0.058181311	1
wormd20121129s268charactercharacterrt23w05r09	10	AF16.50	AF16	23	11/29/12	9	34.58525306	293	360.413333	0.09542217	0.059401876	0.09685822	0.058181311	0
wormd20121129s268charactercharacterrt23w05r10	10	AF16.50	AF16	23	11/29/12	10	35.64647755	293	337.563333	0.12855813	0.059401876	0.48498969	0.058181311	1
wormd20121129s268charactercharacterrt23w05r11	10	AF16.50	AF16	23	11/29/12	11	36.70770204	223	402.930435	0.10707896	0.059401876	0.30167266	0.058181311	1
wormd20121129s268charactercharacterrt23w05r12	10	AF16.50	AF16	23	11/29/12	12	37.76892653	218	359.142857	0.09235274	0.059401876	0.11024352	0.058181311	0
wormd20121129s268charactercharacterrt23w05r13	10	AF16.50	AF16	23	11/29/12	13	38.83015102	195	344.846535	0.09009317	0.059401876	0.08983621	0.058181311	0
wormd20121129s268charactercharacterrt23w05r14	10	AF16.50	AF16	23	11/29/12	14	39.89137551	293	188.976667	0.05940188	0.059401876	0.05818131	0.058181311	0
wormd20121129s268charactercharacterrt23w06r00	11	AF16.51	AF16	23	11/29/12	0	25.03423265	293	387.986667	0.57515427	0.073556842	0.61813209	0.089059933	1
wormd20121129s268charactercharacterrt23w06r01	11	AF16.51	AF16	23	11/29/12	1	26.09545714	288	393.522034	0.58980302	0.073556842	0.6554139	0.089059933	1
wormd20121129s268charactercharacterrt23w06r02	11	AF16.51	AF16	23	11/29/12	2	27.15668163	288	403.59661	0.59915373	0.073556842	0.70630179	0.089059933	1
wormd20121129s268charactercharacterrt23w06r03	11	AF16.51	AF16	23	11/29/12	3	28.21790612	254	363.022989	0.63941597	0.073556842	0.79050325	0.089059933	1
wormd20121129s268charactercharacterrt23w06r04	11	AF16.51	AF16	23	11/29/12	4	29.27913061	226	327.598253	0.66969254	0.073556842	0.79501384	0.089059933	1
wormd20121129s268charactercharacterrt23w06r05	11	AF16.51	AF16	23	11/29/12	5	30.3403551	292	399.491639	0.5529114	0.073556842	0.73700924	0.089059933	1
wormd20121129s268charactercharacterrt23w06r06	11	AF16.51	AF16	23	11/29/12	6	31.40157959	286	390.367698	0.54495386	0.073556842	0.73251659	0.089059933	1
wormd20121129s268charactercharacterrt23w06r07	11	AF16.51	AF16	23	11/29/12	7	32.46280408	238	379.044898	0.56549812	0.073556842	0.7636106	0.089059933	1
wormd20121129s268charactercharacterrt23w06r08	11	AF16.51	AF16	23	11/29/12	8	33.52402857	290	366.723906	0.46431087	0.073556842	0.74552871	0.089059933	1
wormd20121129s268charactercharacterrt23w06r09	11	AF16.51	AF16	23	11/29/12	9	34.58525306	243	334.307692	0.32661779	0.073556842	0.47080619	0.089059933	1
wormd20121129s268charactercharacterrt23w06r10	11	AF16.51	AF16	23	11/29/12	10	35.64647755	269	325.126812	0.13712398	0.073556842	0.23554415	0.089059933	1
wormd20121129s268charactercharacterrt23w06r11	11	AF16.51	AF16	23	11/29/12	11	36.70770204	293	313.773333	0.15135832	0.073556842	0.40933094	0.089059933	1
wormd20121129s268charactercharacterrt23w06r12	11	AF16.51	AF16	23	11/29/12	12	37.76892653	144	231.423841	0.07355684	0.073556842	0.1792694	0.089059933	1
wormd20121129s268charactercharacterrt23w06r13	11	AF16.51	AF16	23	11/29/12	13	38.83015102	293	298.92	0.09827278	0.073556842	0.10781716	0.089059933	0
wormd20121129s268charactercharacterrt23w06r14	11	AF16.51	AF16	23	11/29/12	14	39.89137551	293	308.91	0.09441396	0.073556842	0.09348185	0.089059933	0
wormd20121129s268charactercharacterrt23w06r15	11	AF16.51	AF16	23	11/29/12	15	40.9526	293	316.326667	0.08919583	0.073556842	0.08905993	0.089059933	0
wormd20121129s268charactercharacterrt23w07r00	15	AF16.52	AF16	23	11/29/12	0	25.03423265	256	507.585551	0.56078665	0.053217167	0.60060289	0.053506404	1
wormd20121129s268charactercharacterrt23w07r01	15	AF16.52	AF16	23	11/29/12	1	26.09545714	293	525.626667	0.55128793	0.053217167	0.657767	0.053506404	1
wormd20121129s268charactercharacterrt23w07r02	15	AF16.52	AF16	23	11/29/12	2	27.15668163	242	528.26506	0.60701411	0.053217167	0.72060805	0.053506404	1
wormd20121129s268charactercharacterrt23w07r03	15	AF16.52	AF16	23	11/29/12	3	28.21790612	162	173.02381	0.2271876	0.053217167	0.25012392	0.053506404	1
wormd20121129s268charactercharacterrt23w07r04	15	AF16.52	AF16	23	11/29/12	4	29.27913061	186	312.753769	0.32273416	0.053217167	0.36474037	0.053506404	1
wormd20121129s268charactercharacterrt23w07r05	15	AF16.52	AF16	23	11/29/12	5	30.3403551	194	366.278607	0.33626366	0.053217167	0.41111068	0.053506404	1
wormd20121129s268charactercharacterrt23w07r06	15	AF16.52	AF16	23	11/29/12	6	31.40157959	130	466.270073	0.47793029	0.053217167	0.58546157	0.053506404	1
wormd20121129s268charactercharacterrt23w07r07	15	AF16.52	AF16	23	11/29/12	7	32.46280408	203	514.995238	0.59605633	0.053217167	0.73246441	0.053506404	1
wormd20121129s268charactercharacterrt23w07r08	15	AF16.52	AF16	23	11/29/12	8	33.52402857	228	584.280851	0.44331382	0.053217167	0.67965967	0.053506404	1
wormd20121129s268charactercharacterrt23w07r09	15	AF16.52	AF16	23	11/29/12	9	34.58525306	293	518.656667	0.31953661	0.053217167	0.6022958	0.053506404	1
wormd20121129s268charactercharacterrt23w07r10	15	AF16.52	AF16	23	11/29/12	10	35.64647755	131	408.992806	0.25268536	0.053217167	0.52034719	0.053506404	1
wormd20121129s268charactercharacterrt23w07r11	15	AF16.52	AF16	23	11/29/12	11	36.70770204	260	502.464419	0.06603174	0.053217167	0.11730906	0.053506404	0
wormd20121129s268charactercharacterrt23w07r12	15	AF16.52	AF16	23	11/29/12	12	37.76892653	293	496.34	0.05612842	0.053217167	0.06026462	0.053506404	0
wormd20121129s268charactercharacterrt23w07r13	15	AF16.52	AF16	23	11/29/12	13	38.83015102	293	498.993333	0.05321717	0.053217167	0.0535064	0.053506404	0
wormd20121129s268charactercharacterrt23w07r14	15	AF16.52	AF16	23	11/29/12	14	39.89137551	293	485	0.0553684	0.053217167	0.05522904	0.053506404	0
wormd20121129s268charactercharacterrt23w07r15	15	AF16.52	AF16	23	11/29/12	15	40.9526	293	487.803333	0.05851748	0.053217167	0.0587332	0.053506404	0
wormd20121129s268charactercharacterrt23w08r00	16	AF16.53	AF16	23	11/29/12	0	25.03423265	293	446.15	0.55768715	0.056470288	0.56594494	0.059053004	1
wormd20121129s268charactercharacterrt23w08r01	16	AF16.53	AF16	23	11/29/12	1	26.09545714	269	479.257246	0.57230276	0.056470288	0.68440764	0.059053004	1
wormd20121129s268charactercharacterrt23w08r02	16	AF16.53	AF16	23	11/29/12	2	27.15668163	274	470.793594	0.66140257	0.056470288	0.7931561	0.059053004	1
wormd20121129s268charactercharacterrt23w08r03	16	AF16.53	AF16	23	11/29/12	3	28.21790612	272	485.14841	0.63560088	0.056470288	0.78276006	0.059053004	1
wormd20121129s268charactercharacterrt23w08r04	16	AF16.53	AF16	23	11/29/12	4	29.27913061	234	502.327731	0.6434538	0.056470288	0.78680258	0.059053004	1
wormd20121129s268charactercharacterrt23w08r05	16	AF16.53	AF16	23	11/29/12	5	30.3403551	230	474.219409	0.6363758	0.056470288	0.79530009	0.059053004	1
wormd20121129s268charactercharacterrt23w08r06	16	AF16.53	AF16	23	11/29/12	6	31.40157959	256	474.10687	0.6084514	0.056470288	0.76981084	0.059053004	1
wormd20121129s268charactercharacterrt23w08r07	16	AF16.53	AF16	23	11/29/12	7	32.46280408	233	501.953782	0.59741885	0.056470288	0.76814436	0.059053004	1
wormd20121129s268charactercharacterrt23w08r08	16	AF16.53	AF16	23	11/29/12	8	33.52402857	273	490.859206	0.45248927	0.056470288	0.6714852	0.059053004	1
wormd20121129s268charactercharacterrt23w08r09	16	AF16.53	AF16	23	11/29/12	9	34.58525306	254	487.724138	0.39798031	0.056470288	0.66358491	0.059053004	1
wormd20121129s268charactercharacterrt23w08r10	16	AF16.53	AF16	23	11/29/12	10	35.64647755	276	420.911661	0.3152994	0.056470288	0.65579927	0.059053004	1
wormd20121129s268charactercharacterrt23w08r11	16	AF16.53	AF16	23	11/29/12	11	36.70770204	293	476.723333	0.06756829	0.056470288	0.1217103	0.059053004	0
wormd20121129s268charactercharacterrt23w08r12	16	AF16.53	AF16	23	11/29/12	12	37.76892653	293	460.6	0.066081	0.056470288	0.12020379	0.059053004	0
wormd20121129s268charactercharacterrt23w08r13	16	AF16.53	AF16	23	11/29/12	13	38.83015102	293	418.013333	0.05647029	0.056470288	0.059053	0.059053004	0
wormd20121129s268charactercharacterrt23w08r14	16	AF16.53	AF16	23	11/29/12	14	39.89137551	293	437.223333	0.07040874	0.056470288	0.07060072	0.059053004	0
wormd20121129s268charactercharacterrt23w08r15	16	AF16.53	AF16	23	11/29/12	15	40.9526	293	434.643333	0.06014295	0.056470288	0.06038338	0.059053004	0
wormd20121129s268charactercharacterrt23w09r00	17	AF16.54	AF16	23	11/29/12	0	25.03423265	232	315.200837	0.53294815	0.065931125	0.5700462	0.080527114	1
wormd20121129s268charactercharacterrt23w09r01	17	AF16.54	AF16	23	11/29/12	1	26.09545714	136	307.314685	0.44537339	0.065931125	0.4964113	0.080527114	1
wormd20121129s268charactercharacterrt23w09r02	17	AF16.54	AF16	23	11/29/12	2	27.15668163	177	361.06044	0.57811584	0.065931125	0.71101662	0.080527114	1
wormd20121129s268charactercharacterrt23w09r03	17	AF16.54	AF16	23	11/29/12	3	28.21790612	177	361.39779	0.43258777	0.065931125	0.55360111	0.080527114	1
wormd20121129s268charactercharacterrt23w09r04	17	AF16.54	AF16	23	11/29/12	4	29.27913061	238	323.260331	0.56374329	0.065931125	0.742019	0.080527114	1
wormd20121129s268charactercharacterrt23w09r06	17	AF16.54	AF16	23	11/29/12	6	31.40157959	140	121.729167	0.23686685	0.065931125	0.25415029	0.080527114	1
wormd20121129s268charactercharacterrt23w09r07	17	AF16.54	AF16	23	11/29/12	7	32.46280408	206	306.97619	0.54660276	0.065931125	0.68602821	0.080527114	1
wormd20121129s268charactercharacterrt23w09r08	17	AF16.54	AF16	23	11/29/12	8	33.52402857	293	277.1	0.08657085	0.065931125	0.09155978	0.080527114	0
wormd20121129s268charactercharacterrt23w09r09	17	AF16.54	AF16	23	11/29/12	9	34.58525306	293	278.353333	0.0779714	0.065931125	0.08052711	0.080527114	0
wormd20121129s268charactercharacterrt23w09r10	17	AF16.54	AF16	23	11/29/12	10	35.64647755	293	318.476667	0.0974337	0.065931125	0.20449495	0.080527114	1
wormd20121129s268charactercharacterrt23w09r11	17	AF16.54	AF16	23	11/29/12	11	36.70770204	293	319.02	0.06593112	0.065931125	0.08540667	0.080527114	0
wormd20121129s268charactercharacterrt23w09r12	17	AF16.54	AF16	23	11/29/12	12	37.76892653	293	326.27	0.07227493	0.065931125	0.09920508	0.080527114	0
wormd20121129s268charactercharacterrt23w09r13	17	AF16.54	AF16	23	11/29/12	13	38.83015102	293	342.043333	0.08131345	0.065931125	0.08146139	0.080527114	0
wormd20121129s268charactercharacterrt23w09r14	17	AF16.54	AF16	23	11/29/12	14	39.89137551	293	317.94	0.08667783	0.065931125	0.08769617	0.080527114	0
wormd20121129s268charactercharacterrt23w09r15	17	AF16.54	AF16	23	11/29/12	15	40.9526	293	328.366667	0.09546692	0.065931125	0.09476341	0.080527114	0
wormd20121130s322PB1144AF16rt23w04r00	3	AF16.55	AF16	23	11/30/12	0	25.03423265	293	388.91	0.5386896	0.012461729	0.66343633	0.013025954	1
wormd20121130s322PB1144AF16rt23w04r01	3	AF16.55	AF16	23	11/30/12	1	26.09545714	250	395.541176	0.56865931	0.012461729	0.66297212	0.013025954	1
wormd20121130s322PB1144AF16rt23w04r02	3	AF16.55	AF16	23	11/30/12	2	27.15668163	173	390.714286	0.57151613	0.012461729	0.68954698	0.013025954	1
wormd20121130s322PB1144AF16rt23w04r03	3	AF16.55	AF16	23	11/30/12	3	28.21790612	109	306.547826	0.26706301	0.012461729	0.299532	0.013025954	1
wormd20121130s322PB1144AF16rt23w04r04	3	AF16.55	AF16	23	11/30/12	4	29.27913061	136	384.630435	0.51483974	0.012461729	0.64651566	0.013025954	1
wormd20121130s322PB1144AF16rt23w04r05	3	AF16.55	AF16	23	11/30/12	5	30.3403551	148	399.025806	0.43855166	0.012461729	0.67263539	0.013025954	1
wormd20121130s322PB1144AF16rt23w04r07	3	AF16.55	AF16	23	11/30/12	7	32.46280408	150	145.691358	0.06564755	0.012461729	0.07431655	0.013025954	0
wormd20121130s322PB1144AF16rt23w04r08	3	AF16.55	AF16	23	11/30/12	8	33.52402857	105	210.844037	0.04119907	0.012461729	0.08349295	0.013025954	0
wormd20121130s322PB1144AF16rt23w04r09	3	AF16.55	AF16	23	11/30/12	9	34.58525306	117	263.737705	0.0416075	0.012461729	0.11693041	0.013025954	0
wormd20121130s322PB1144AF16rt23w04r10	3	AF16.55	AF16	23	11/30/12	10	35.64647755	176	251.945355	0.03673292	0.012461729	0.06298384	0.013025954	0
wormd20121130s322PB1144AF16rt23w04r11	3	AF16.55	AF16	23	11/30/12	11	36.70770204	204	340.836538	0.0676961	0.012461729	0.09523569	0.013025954	0
wormd20121130s322PB1144AF16rt23w04r13	3	AF16.55	AF16	23	11/30/12	13	38.83015102	105	144.567568	0.02160855	0.012461729	0.02441639	0.013025954	0
wormd20121130s322PB1144AF16rt23w04r14	3	AF16.55	AF16	23	11/30/12	14	39.89137551	149	123.039474	0.01246173	0.012461729	0.01302595	0.013025954	0
wormd20121130s322PB1144AF16rt23w04r15	3	AF16.55	AF16	23	11/30/12	15	40.9526	136	122.692308	0.01763696	0.012461729	0.01415823	0.013025954	0
wormd20121130s322PB1144AF16rt23w05r00	4	AF16.56	AF16	23	11/30/12	0	25.03423265	293	371.03	0.57000367	0.075109852	0.68700266	0.07956079	1
wormd20121130s322PB1144AF16rt23w05r01	4	AF16.56	AF16	23	11/30/12	1	26.09545714	202	372.700483	0.57932929	0.075109852	0.73369564	0.07956079	1
wormd20121130s322PB1144AF16rt23w05r02	4	AF16.56	AF16	23	11/30/12	2	27.15668163	272	358.354839	0.62050873	0.075109852	0.75867431	0.07956079	1
wormd20121130s322PB1144AF16rt23w05r03	4	AF16.56	AF16	23	11/30/12	3	28.21790612	192	366.984925	0.59856606	0.075109852	0.72406329	0.07956079	1
wormd20121130s322PB1144AF16rt23w05r04	4	AF16.56	AF16	23	11/30/12	4	29.27913061	138	161.587413	0.18746986	0.075109852	0.23814122	0.07956079	1
wormd20121130s322PB1144AF16rt23w05r06	4	AF16.56	AF16	23	11/30/12	6	31.40157959	195	94.2238806	0.15313693	0.075109852	0.15678325	0.07956079	1
wormd20121130s322PB1144AF16rt23w05r07	4	AF16.56	AF16	23	11/30/12	7	32.46280408	183	86.1481481	0.14083882	0.075109852	0.14185931	0.07956079	1
wormd20121130s322PB1144AF16rt23w05r08	4	AF16.56	AF16	23	11/30/12	8	33.52402857	199	314.038835	0.08215732	0.075109852	0.11227946	0.07956079	0
wormd20121130s322PB1144AF16rt23w05r09	4	AF16.56	AF16	23	11/30/12	9	34.58525306	293	290.393333	0.07825874	0.075109852	0.10471088	0.07956079	0
wormd20121130s322PB1144AF16rt23w05r10	4	AF16.56	AF16	23	11/30/12	10	35.64647755	293	335.636667	0.08802465	0.075109852	0.17761018	0.07956079	1
wormd20121130s322PB1144AF16rt23w05r11	4	AF16.56	AF16	23	11/30/12	11	36.70770204	293	343.72	0.0799294	0.075109852	0.08746099	0.07956079	0
wormd20121130s322PB1144AF16rt23w05r12	4	AF16.56	AF16	23	11/30/12	12	37.76892653	293	342.226667	0.07510985	0.075109852	0.07956079	0.07956079	0
wormd20121130s322PB1144AF16rt23w05r13	4	AF16.56	AF16	23	11/30/12	13	38.83015102	284	322.828179	0.09059474	0.075109852	0.08929512	0.07956079	0
wormd20121130s322PB1144AF16rt23w05r14	4	AF16.56	AF16	23	11/30/12	14	39.89137551	293	313.64	0.09507072	0.075109852	0.0944889	0.07956079	0
wormd20121130s322PB1144AF16rt23w05r15	4	AF16.56	AF16	23	11/30/12	15	40.9526	293	311.776667	0.0875841	0.075109852	0.08776978	0.07956079	0
wormd20121130s322PB1144AF16rt23w06r00	5	AF16.57	AF16	23	11/30/12	0	25.03423265	293	389.6	0.54422972	0.022268752	0.66643257	0.02783524	1
wormd20121130s322PB1144AF16rt23w06r01	5	AF16.57	AF16	23	11/30/12	1	26.09545714	293	402.183333	0.53738719	0.022268752	0.66432855	0.02783524	1
wormd20121130s322PB1144AF16rt23w06r02	5	AF16.57	AF16	23	11/30/12	2	27.15668163	293	409.836667	0.55993815	0.022268752	0.69877172	0.02783524	1
wormd20121130s322PB1144AF16rt23w06r03	5	AF16.57	AF16	23	11/30/12	3	28.21790612	142	366.073826	0.57569363	0.022268752	0.6403141	0.02783524	1
wormd20121130s322PB1144AF16rt23w06r04	5	AF16.57	AF16	23	11/30/12	4	29.27913061	238	397.481633	0.55023033	0.022268752	0.60357096	0.02783524	1
wormd20121130s322PB1144AF16rt23w06r05	5	AF16.57	AF16	23	11/30/12	5	30.3403551	262	386.096654	0.57292488	0.022268752	0.72054059	0.02783524	1
wormd20121130s322PB1144AF16rt23w06r06	5	AF16.57	AF16	23	11/30/12	6	31.40157959	207	370.966667	0.48144952	0.022268752	0.70662461	0.02783524	1
wormd20121130s322PB1144AF16rt23w06r07	5	AF16.57	AF16	23	11/30/12	7	32.46280408	112	286.418803	0.24599181	0.022268752	0.42928805	0.02783524	1
wormd20121130s322PB1144AF16rt23w06r08	5	AF16.57	AF16	23	11/30/12	8	33.52402857	142	330.020134	0.32198642	0.022268752	0.73026287	0.02783524	1
wormd20121130s322PB1144AF16rt23w06r10	5	AF16.57	AF16	23	11/30/12	10	35.64647755	100	100.165049	0.02226875	0.022268752	0.02783524	0.02783524	0
wormd20121130s322PB1144AF16rt23w06r11	5	AF16.57	AF16	23	11/30/12	11	36.70770204	293	330.876667	0.09714676	0.022268752	0.2450605	0.02783524	1
wormd20121130s322PB1144AF16rt23w06r12	5	AF16.57	AF16	23	11/30/12	12	37.76892653	286	323.024306	0.0755436	0.022268752	0.08411983	0.02783524	0
wormd20121130s322PB1144AF16rt23w06r13	5	AF16.57	AF16	23	11/30/12	13	38.83015102	278	324.750877	0.08579024	0.022268752	0.08737667	0.02783524	0
wormd20121130s322PB1144AF16rt23w06r14	5	AF16.57	AF16	23	11/30/12	14	39.89137551	211	322.683486	0.09072282	0.022268752	0.08991059	0.02783524	0
wormd20121130s322PB1144AF16rt23w10r00	9	AF16.58	AF16	23	11/30/12	0	25.03423265	283	359.241379	0.60385903	0.006109009	0.66778182	0.007454048	1
wormd20121130s322PB1144AF16rt23w10r01	9	AF16.58	AF16	23	11/30/12	1	26.09545714	174	360.045455	0.58670639	0.006109009	0.67176733	0.007454048	1
wormd20121130s322PB1144AF16rt23w10r02	9	AF16.58	AF16	23	11/30/12	2	27.15668163	293	381.643333	0.56596746	0.006109009	0.6581236	0.007454048	1
wormd20121130s322PB1144AF16rt23w10r03	9	AF16.58	AF16	23	11/30/12	3	28.21790612	293	376.373333	0.46204472	0.006109009	0.70314514	0.007454048	1
wormd20121130s322PB1144AF16rt23w10r04	9	AF16.58	AF16	23	11/30/12	4	29.27913061	135	266.392857	0.35432321	0.006109009	0.44466955	0.007454048	1
wormd20121130s322PB1144AF16rt23w10r05	9	AF16.58	AF16	23	11/30/12	5	30.3403551	251	420.050388	0.53508383	0.006109009	0.61870298	0.007454048	1
wormd20121130s322PB1144AF16rt23w10r06	9	AF16.58	AF16	23	11/30/12	6	31.40157959	252	99.5444015	0.00610901	0.006109009	0.00745405	0.007454048	0
wormd20121130s322PB1144AF16rt23w10r07	9	AF16.58	AF16	23	11/30/12	7	32.46280408	197	422.004902	0.43798451	0.006109009	0.70816028	0.007454048	1
wormd20121130s322PB1144AF16rt23w10r08	9	AF16.58	AF16	23	11/30/12	8	33.52402857	163	321.696429	0.31102539	0.006109009	0.56592128	0.007454048	1
wormd20121130s322PB1144AF16rt23w10r09	9	AF16.58	AF16	23	11/30/12	9	34.58525306	123	205.251969	0.01472299	0.006109009	0.01542493	0.007454048	0
wormd20121130s322PB1144AF16rt23w10r10	9	AF16.58	AF16	23	11/30/12	10	35.64647755	143	226.793333	0.02730443	0.006109009	0.04702706	0.007454048	0
wormd20121130s322PB1144AF16rt23w10r11	9	AF16.58	AF16	23	11/30/12	11	36.70770204	293	323.07	0.0822879	0.006109009	0.09438091	0.007454048	0
wormd20121130s322PB1144AF16rt23w10r12	9	AF16.58	AF16	23	11/30/12	12	37.76892653	293	322.313333	0.09575448	0.006109009	0.18503202	0.007454048	1
wormd20121130s322PB1144AF16rt23w10r13	9	AF16.58	AF16	23	11/30/12	13	38.83015102	293	336.986667	0.09148715	0.006109009	0.09110117	0.007454048	0
wormd20121130s322PB1144AF16rt23w10r14	9	AF16.58	AF16	23	11/30/12	14	39.89137551	293	324.47	0.09926914	0.006109009	0.09898509	0.007454048	0
wormd20121130s322PB1144AF16rt23w10r15	9	AF16.58	AF16	23	11/30/12	15	40.9526	293	318.836667	0.09260458	0.006109009	0.09069834	0.007454048	0
wormd20121130s322PB1144AF16rt23w11r00	10	AF16.59	AF16	23	11/30/12	0	25.03423265	227	348.133621	0.50903764	0.013500504	0.61342434	0.012724777	1
wormd20121130s322PB1144AF16rt23w11r01	10	AF16.59	AF16	23	11/30/12	1	26.09545714	293	395.803333	0.49356854	0.013500504	0.63029316	0.012724777	1
wormd20121130s322PB1144AF16rt23w11r02	10	AF16.59	AF16	23	11/30/12	2	27.15668163	142	366.697987	0.54089822	0.013500504	0.71220236	0.012724777	1
wormd20121130s322PB1144AF16rt23w11r03	10	AF16.59	AF16	23	11/30/12	3	28.21790612	154	359.25	0.52213423	0.013500504	0.65698818	0.012724777	1
wormd20121130s322PB1144AF16rt23w11r05	10	AF16.59	AF16	23	11/30/12	5	30.3403551	133	354.97037	0.37646434	0.013500504	0.62800208	0.012724777	1
wormd20121130s322PB1144AF16rt23w11r07	10	AF16.59	AF16	23	11/30/12	7	32.46280408	116	80.7745098	0.02050503	0.013500504	0.02745595	0.012724777	0
wormd20121130s322PB1144AF16rt23w11r08	10	AF16.59	AF16	23	11/30/12	8	33.52402857	149	267.662338	0.06519085	0.013500504	0.07098765	0.012724777	0
wormd20121130s322PB1144AF16rt23w11r09	10	AF16.59	AF16	23	11/30/12	9	34.58525306	267	382.094891	0.10212061	0.013500504	0.13941443	0.012724777	0
wormd20121130s322PB1144AF16rt23w11r10	10	AF16.59	AF16	23	11/30/12	10	35.64647755	241	159.967742	0.03702473	0.013500504	0.04594155	0.012724777	0
wormd20121130s322PB1144AF16rt23w11r11	10	AF16.59	AF16	23	11/30/12	11	36.70770204	247	77.1181102	0.01378249	0.013500504	0.01322698	0.012724777	0
wormd20121130s322PB1144AF16rt23w11r12	10	AF16.59	AF16	23	11/30/12	12	37.76892653	197	78.0738916	0.0135005	0.013500504	0.01272478	0.012724777	0
wormd20121130s322PB1144AF16rt23w11r13	10	AF16.59	AF16	23	11/30/12	13	38.83015102	255	344.053435	0.10451136	0.013500504	0.10966048	0.012724777	0
wormd20121130s322PB1144AF16rt23w11r14	10	AF16.59	AF16	23	11/30/12	14	39.89137551	188	389.933333	0.10777477	0.013500504	0.10917177	0.012724777	0
wormd20121130s322PB1144AF16rt23w11r15	10	AF16.59	AF16	23	11/30/12	15	40.9526	150	503.877419	0.1078142	0.013500504	0.11200365	0.012724777	0
wormd20121130s322PB1144AF16rt23w12r00	11	AF16.60	AF16	23	11/30/12	0	25.03423265	277	308.936396	0.60745161	0.086190372	0.76614329	0.123187038	1
wormd20121130s322PB1144AF16rt23w12r01	11	AF16.60	AF16	23	11/30/12	1	26.09545714	292	342.133779	0.57744182	0.086190372	0.72958154	0.123187038	1
wormd20121130s322PB1144AF16rt23w12r02	11	AF16.60	AF16	23	11/30/12	2	27.15668163	275	327.812057	0.58785802	0.086190372	0.71257396	0.123187038	1
wormd20121130s322PB1144AF16rt23w12r04	11	AF16.60	AF16	23	11/30/12	4	29.27913061	236	299.773109	0.63282171	0.086190372	0.77818412	0.123187038	1
wormd20121130s322PB1144AF16rt23w12r05	11	AF16.60	AF16	23	11/30/12	5	30.3403551	156	164.226994	0.28487122	0.086190372	0.34210329	0.123187038	1
wormd20121130s322PB1144AF16rt23w12r06	11	AF16.60	AF16	23	11/30/12	6	31.40157959	224	270.445887	0.39491539	0.086190372	0.52159143	0.123187038	1
wormd20121130s322PB1144AF16rt23w12r09	11	AF16.60	AF16	23	11/30/12	9	34.58525306	146	319.20915	0.09707798	0.086190372	0.14621597	0.123187038	1
wormd20121130s322PB1144AF16rt23w12r10	11	AF16.60	AF16	23	11/30/12	10	35.64647755	240	294.391837	0.09612033	0.086190372	0.16272516	0.123187038	1
wormd20121130s322PB1144AF16rt23w12r11	11	AF16.60	AF16	23	11/30/12	11	36.70770204	190	280.467005	0.08619037	0.086190372	0.12318704	0.123187038	0
wormd20121130s322PB1144AF16rt23w16r00	15	AF16.61	AF16	23	11/30/12	0	25.03423265	292	473.270903	0.48031614	0.086394204	0.61148077	0.08690415	1
wormd20121130s322PB1144AF16rt23w16r01	15	AF16.61	AF16	23	11/30/12	1	26.09545714	288	478.305085	0.52009966	0.086394204	0.61776868	0.08690415	1
wormd20121130s322PB1144AF16rt23w16r02	15	AF16.61	AF16	23	11/30/12	2	27.15668163	293	464.05	0.52442487	0.086394204	0.64109305	0.08690415	1
wormd20121130s322PB1144AF16rt23w16r03	15	AF16.61	AF16	23	11/30/12	3	28.21790612	115	138.043103	0.12190221	0.086394204	0.13911508	0.08690415	0
wormd20121130s322PB1144AF16rt23w16r04	15	AF16.61	AF16	23	11/30/12	4	29.27913061	174	446.090909	0.51194517	0.086394204	0.65507629	0.08690415	1
wormd20121130s322PB1144AF16rt23w16r05	15	AF16.61	AF16	23	11/30/12	5	30.3403551	246	434.573123	0.60051882	0.086394204	0.67275205	0.08690415	1
wormd20121130s322PB1144AF16rt23w16r06	15	AF16.61	AF16	23	11/30/12	6	31.40157959	268	485.904762	0.53339659	0.086394204	0.69220185	0.08690415	1
wormd20121130s322PB1144AF16rt23w16r07	15	AF16.61	AF16	23	11/30/12	7	32.46280408	100	477.489209	0.31192004	0.086394204	0.59410907	0.08690415	1
wormd20121130s322PB1144AF16rt23w16r08	15	AF16.61	AF16	23	11/30/12	8	33.52402857	127	448.070652	0.24188889	0.086394204	0.60785921	0.08690415	1
wormd20121130s322PB1144AF16rt23w16r09	15	AF16.61	AF16	23	11/30/12	9	34.58525306	248	447.168627	0.33575383	0.086394204	0.6623483	0.08690415	1
wormd20121130s322PB1144AF16rt23w16r10	15	AF16.61	AF16	23	11/30/12	10	35.64647755	153	450.36875	0.10039966	0.086394204	0.2274934	0.08690415	1
wormd20121130s322PB1144AF16rt23w16r11	15	AF16.61	AF16	23	11/30/12	11	36.70770204	293	434.19	0.09607725	0.086394204	0.20457042	0.08690415	1
wormd20121130s322PB1144AF16rt23w16r12	15	AF16.61	AF16	23	11/30/12	12	37.76892653	293	413.786667	0.0967365	0.086394204	0.12981967	0.08690415	0
wormd20121130s322PB1144AF16rt23w16r13	15	AF16.61	AF16	23	11/30/12	13	38.83015102	293	423.666667	0.09141306	0.086394204	0.08986074	0.08690415	0
wormd20121130s322PB1144AF16rt23w16r14	15	AF16.61	AF16	23	11/30/12	14	39.89137551	293	408.253333	0.09148765	0.086394204	0.09313417	0.08690415	0
wormd20121130s322PB1144AF16rt23w16r15	15	AF16.61	AF16	23	11/30/12	15	40.9526	293	387.74	0.0863942	0.086394204	0.08690415	0.08690415	0
wormd20121130s322PB1144AF16rt23w17r00	16	AF16.62	AF16	23	11/30/12	0	25.03423265	293	475.076667	0.51132596	0.074940938	0.6000234	0.073053532	1
wormd20121130s322PB1144AF16rt23w17r01	16	AF16.62	AF16	23	11/30/12	1	26.09545714	293	472.1	0.50470307	0.074940938	0.6129643	0.073053532	1
wormd20121130s322PB1144AF16rt23w17r02	16	AF16.62	AF16	23	11/30/12	2	27.15668163	293	490.856667	0.52181742	0.074940938	0.60857415	0.073053532	1
wormd20121130s322PB1144AF16rt23w17r03	16	AF16.62	AF16	23	11/30/12	3	28.21790612	270	475.743682	0.5062663	0.074940938	0.67376	0.073053532	1
wormd20121130s322PB1144AF16rt23w17r04	16	AF16.62	AF16	23	11/30/12	4	29.27913061	272	505.516129	0.64726255	0.074940938	0.7569974	0.073053532	1
wormd20121130s322PB1144AF16rt23w17r09	16	AF16.62	AF16	23	11/30/12	9	34.58525306	165	413.465116	0.08229879	0.074940938	0.09783829	0.073053532	0
wormd20121130s322PB1144AF16rt23w17r10	16	AF16.62	AF16	23	11/30/12	10	35.64647755	174	408.573864	0.11015162	0.074940938	0.39662245	0.073053532	1
wormd20121130s322PB1144AF16rt23w17r11	16	AF16.62	AF16	23	11/30/12	11	36.70770204	293	392.756667	0.09212851	0.074940938	0.18747703	0.073053532	1
wormd20121130s322PB1144AF16rt23w17r12	16	AF16.62	AF16	23	11/30/12	12	37.76892653	248	394	0.08306357	0.074940938	0.08670773	0.073053532	0
wormd20121130s322PB1144AF16rt23w17r13	16	AF16.62	AF16	23	11/30/12	13	38.83015102	230	418.919831	0.0862325	0.074940938	0.08614119	0.073053532	0
wormd20121130s322PB1144AF16rt23w17r14	16	AF16.62	AF16	23	11/30/12	14	39.89137551	233	397.283898	0.07494094	0.074940938	0.07305353	0.073053532	0
wormd20121130s322PB1144AF16rt23w17r15	16	AF16.62	AF16	23	11/30/12	15	40.9526	293	413.7	0.08724996	0.074940938	0.08701878	0.073053532	0
wormd20121201s314AF16HK104rt23w01r00	0	AF16.63	AF16	23	12/01/12	0	25.03423265	265	280.316176	0.3743198	0.088792794	0.43777996	0.087931139	1
wormd20121201s314AF16HK104rt23w01r01	0	AF16.63	AF16	23	12/01/12	1	26.09545714	136	265.049296	0.41254632	0.088792794	0.5152591	0.087931139	1
wormd20121201s314AF16HK104rt23w01r02	0	AF16.63	AF16	23	12/01/12	2	27.15668163	150	208.954545	0.27348479	0.088792794	0.32888609	0.087931139	1
wormd20121201s314AF16HK104rt23w01r03	0	AF16.63	AF16	23	12/01/12	3	28.21790612	113	199.516667	0.27226045	0.088792794	0.33201551	0.087931139	1
wormd20121201s314AF16HK104rt23w01r04	0	AF16.63	AF16	23	12/01/12	4	29.27913061	171	325.252809	0.62142064	0.088792794	0.69953843	0.087931139	1
wormd20121201s314AF16HK104rt23w01r07	0	AF16.63	AF16	23	12/01/12	7	32.46280408	146	385.424837	0.52207355	0.088792794	0.69936261	0.087931139	1
wormd20121201s314AF16HK104rt23w01r08	0	AF16.63	AF16	23	12/01/12	8	33.52402857	240	334.106557	0.47222257	0.088792794	0.64728421	0.087931139	1
wormd20121201s314AF16HK104rt23w01r09	0	AF16.63	AF16	23	12/01/12	9	34.58525306	241	332.310484	0.41690203	0.088792794	0.67957972	0.087931139	1
wormd20121201s314AF16HK104rt23w01r10	0	AF16.63	AF16	23	12/01/12	10	35.64647755	292	516.793919	0.13535243	0.088792794	0.15809199	0.087931139	1
wormd20121201s314AF16HK104rt23w01r11	0	AF16.63	AF16	23	12/01/12	11	36.70770204	269	475.527273	0.14187574	0.088792794	0.30821961	0.087931139	1
wormd20121201s314AF16HK104rt23w01r12	0	AF16.63	AF16	23	12/01/12	12	37.76892653	167	331.781609	0.13709783	0.088792794	0.20241977	0.087931139	1
wormd20121201s314AF16HK104rt23w01r13	0	AF16.63	AF16	23	12/01/12	13	38.83015102	282	300.370242	0.10751693	0.088792794	0.10609627	0.087931139	0
wormd20121201s314AF16HK104rt23w01r14	0	AF16.63	AF16	23	12/01/12	14	39.89137551	293	321.47	0.08879279	0.088792794	0.08793114	0.087931139	0
wormd20121201s314AF16HK104rt23w01r15	0	AF16.63	AF16	23	12/01/12	15	40.9526	293	332.083333	0.09502283	0.088792794	0.09272808	0.087931139	0
wormd20121201s314AF16HK104rt23w02r00	1	AF16.64	AF16	23	12/01/12	0	25.03423265	293	359.85	0.51795711	0.062671227	0.73582732	0.062402436	1
wormd20121201s314AF16HK104rt23w02r01	1	AF16.64	AF16	23	12/01/12	1	26.09545714	240	374.26749	0.48817612	0.062671227	0.70468589	0.062402436	1
wormd20121201s314AF16HK104rt23w02r02	1	AF16.64	AF16	23	12/01/12	2	27.15668163	214	348.082192	0.62117405	0.062671227	0.75536925	0.062402436	1
wormd20121201s314AF16HK104rt23w02r03	1	AF16.64	AF16	23	12/01/12	3	28.21790612	157	315.51875	0.54232909	0.062671227	0.78826108	0.062402436	1
wormd20121201s314AF16HK104rt23w02r05	1	AF16.64	AF16	23	12/01/12	5	30.3403551	202	324.220096	0.49132453	0.062671227	0.78022307	0.062402436	1
wormd20121201s314AF16HK104rt23w02r06	1	AF16.64	AF16	23	12/01/12	6	31.40157959	151	373.433155	0.23083487	0.062671227	0.65883396	0.062402436	1
wormd20121201s314AF16HK104rt23w02r07	1	AF16.64	AF16	23	12/01/12	7	32.46280408	293	332.813333	0.08118057	0.062671227	0.14206006	0.062402436	1
wormd20121201s314AF16HK104rt23w02r08	1	AF16.64	AF16	23	12/01/12	8	33.52402857	293	276.44	0.08421903	0.062671227	0.08590719	0.062402436	0
wormd20121201s314AF16HK104rt23w02r09	1	AF16.64	AF16	23	12/01/12	9	34.58525306	133	291.734104	0.1432167	0.062671227	0.526123	0.062402436	1
wormd20121201s314AF16HK104rt23w02r11	1	AF16.64	AF16	23	12/01/12	11	36.70770204	293	276.32	0.11907818	0.062671227	0.33528575	0.062402436	1
wormd20121201s314AF16HK104rt23w02r12	1	AF16.64	AF16	23	12/01/12	12	37.76892653	293	322.666667	0.11226642	0.062671227	0.29562092	0.062402436	1
wormd20121201s314AF16HK104rt23w02r13	1	AF16.64	AF16	23	12/01/12	13	38.83015102	293	320.84	0.07737829	0.062671227	0.07776494	0.062402436	0
wormd20121201s314AF16HK104rt23w02r14	1	AF16.64	AF16	23	12/01/12	14	39.89137551	293	345.826667	0.07558023	0.062671227	0.07523209	0.062402436	0
wormd20121201s314AF16HK104rt23w02r15	1	AF16.64	AF16	23	12/01/12	15	40.9526	293	358.626667	0.06267123	0.062671227	0.06240244	0.062402436	0
wormd20121201s314AF16HK104rt23w03r00	2	AF16.65	AF16	23	12/01/12	0	25.03423265	293	431.56	0.46478987	0.076320603	0.54261444	0.081441193	1
wormd20121201s314AF16HK104rt23w03r01	2	AF16.65	AF16	23	12/01/12	1	26.09545714	109	279.142857	0.30089807	0.076320603	0.36325714	0.081441193	1
wormd20121201s314AF16HK104rt23w03r02	2	AF16.65	AF16	23	12/01/12	2	27.15668163	173	431.340909	0.4768901	0.076320603	0.58663349	0.081441193	1
wormd20121201s314AF16HK104rt23w03r03	2	AF16.65	AF16	23	12/01/12	3	28.21790612	121	422.117188	0.43348695	0.076320603	0.55672147	0.081441193	1
wormd20121201s314AF16HK104rt23w03r04	2	AF16.65	AF16	23	12/01/12	4	29.27913061	226	447.493562	0.50621614	0.076320603	0.67449724	0.081441193	1
wormd20121201s314AF16HK104rt23w03r09	2	AF16.65	AF16	23	12/01/12	9	34.58525306	154	467.43038	0.0763206	0.076320603	0.08144119	0.081441193	0
wormd20121201s314AF16HK104rt23w03r11	2	AF16.65	AF16	23	12/01/12	11	36.70770204	130	500.696296	0.10327779	0.076320603	0.1842953	0.081441193	1
wormd20121201s314AF16HK104rt23w07r00	6	AF16.66	AF16	23	12/01/12	0	25.03423265	293	301.67	0.67576403	0.104749397	0.71131342	0.102133993	1
wormd20121201s314AF16HK104rt23w07r01	6	AF16.66	AF16	23	12/01/12	1	26.09545714	263	223.418519	0.76074874	0.104749397	0.82055717	0.102133993	1
wormd20121201s314AF16HK104rt23w07r02	6	AF16.66	AF16	23	12/01/12	2	27.15668163	246	207.73913	0.78417925	0.104749397	0.82255114	0.102133993	1
wormd20121201s314AF16HK104rt23w07r03	6	AF16.66	AF16	23	12/01/12	3	28.21790612	147	282.519737	0.7145687	0.104749397	0.81992334	0.102133993	1
wormd20121201s314AF16HK104rt23w07r04	6	AF16.66	AF16	23	12/01/12	4	29.27913061	236	213.173554	0.70646815	0.104749397	0.83512306	0.102133993	1
wormd20121201s314AF16HK104rt23w07r05	6	AF16.66	AF16	23	12/01/12	5	30.3403551	133	271.073529	0.62908398	0.104749397	0.78919096	0.102133993	1
wormd20121201s314AF16HK104rt23w07r06	6	AF16.66	AF16	23	12/01/12	6	31.40157959	146	297.409091	0.62378703	0.104749397	0.74321636	0.102133993	1
wormd20121201s314AF16HK104rt23w07r07	6	AF16.66	AF16	23	12/01/12	7	32.46280408	176	235.138889	0.6171587	0.104749397	0.75669915	0.102133993	1
wormd20121201s314AF16HK104rt23w07r08	6	AF16.66	AF16	23	12/01/12	8	33.52402857	225	257.435345	0.51061749	0.104749397	0.79101761	0.102133993	1
wormd20121201s314AF16HK104rt23w07r09	6	AF16.66	AF16	23	12/01/12	9	34.58525306	216	203.366516	0.23777303	0.104749397	0.65664307	0.102133993	1
wormd20121201s314AF16HK104rt23w07r10	6	AF16.66	AF16	23	12/01/12	10	35.64647755	293	175.523333	0.11739724	0.104749397	0.15425597	0.102133993	1
wormd20121201s314AF16HK104rt23w07r11	6	AF16.66	AF16	23	12/01/12	11	36.70770204	292	175.799331	0.13328806	0.104749397	0.21664997	0.102133993	1
wormd20121201s314AF16HK104rt23w07r12	6	AF16.66	AF16	23	12/01/12	12	37.76892653	293	177.813333	0.1106906	0.104749397	0.11421541	0.102133993	0
wormd20121201s314AF16HK104rt23w07r13	6	AF16.66	AF16	23	12/01/12	13	38.83015102	292	180.374582	0.14152838	0.104749397	0.14310722	0.102133993	1
wormd20121201s314AF16HK104rt23w07r14	6	AF16.66	AF16	23	12/01/12	14	39.89137551	291	180.063758	0.1047494	0.104749397	0.10213399	0.102133993	0
wormd20121201s314AF16HK104rt23w07r15	6	AF16.66	AF16	23	12/01/12	15	40.9526	293	203.25	0.12560209	0.104749397	0.12489639	0.102133993	0
wormd20121201s314AF16HK104rt23w08r00	7	AF16.67	AF16	23	12/01/12	0	25.03423265	292	379.411371	0.60475559	0.070326789	0.69728755	0.074331237	1
wormd20121201s314AF16HK104rt23w08r01	7	AF16.67	AF16	23	12/01/12	1	26.09545714	261	376.208955	0.57786713	0.070326789	0.68727093	0.074331237	1
wormd20121201s314AF16HK104rt23w08r04	7	AF16.67	AF16	23	12/01/12	4	29.27913061	285	371.622837	0.5015931	0.070326789	0.73142932	0.074331237	1
wormd20121201s314AF16HK104rt23w08r05	7	AF16.67	AF16	23	12/01/12	5	30.3403551	143	385.713333	0.46387024	0.070326789	0.6774325	0.074331237	1
wormd20121201s314AF16HK104rt23w08r08	7	AF16.67	AF16	23	12/01/12	8	33.52402857	126	367.119048	0.36216095	0.070326789	0.65061863	0.074331237	1
wormd20121201s314AF16HK104rt23w08r09	7	AF16.67	AF16	23	12/01/12	9	34.58525306	266	416.251701	0.15309065	0.070326789	0.22817954	0.074331237	1
wormd20121201s314AF16HK104rt23w08r10	7	AF16.67	AF16	23	12/01/12	10	35.64647755	128	467.430052	0.07941995	0.070326789	0.1972524	0.074331237	1
wormd20121201s314AF16HK104rt23w08r11	7	AF16.67	AF16	23	12/01/12	11	36.70770204	206	408.812	0.09372997	0.070326789	0.29949803	0.074331237	1
wormd20121201s314AF16HK104rt23w08r12	7	AF16.67	AF16	23	12/01/12	12	37.76892653	293	367.686667	0.07032679	0.070326789	0.07532455	0.074331237	0
wormd20121201s314AF16HK104rt23w08r13	7	AF16.67	AF16	23	12/01/12	13	38.83015102	293	363.006667	0.07466229	0.070326789	0.07630838	0.074331237	0
wormd20121201s314AF16HK104rt23w08r14	7	AF16.67	AF16	23	12/01/12	14	39.89137551	293	359.766667	0.07711157	0.070326789	0.07804118	0.074331237	0
wormd20121201s314AF16HK104rt23w08r15	7	AF16.67	AF16	23	12/01/12	15	40.9526	293	362.683333	0.07417424	0.070326789	0.07433124	0.074331237	0
wormd20121201s314AF16HK104rt23w09r00	8	AF16.68	AF16	23	12/01/12	0	25.03423265	293	370.29	0.52692918	0.077078865	0.70431412	0.08831341	1
wormd20121201s314AF16HK104rt23w09r01	8	AF16.68	AF16	23	12/01/12	1	26.09545714	289	393.602041	0.4684642	0.077078865	0.69986543	0.08831341	1
wormd20121201s314AF16HK104rt23w09r02	8	AF16.68	AF16	23	12/01/12	2	27.15668163	293	391.926667	0.41758588	0.077078865	0.70387589	0.08831341	1
wormd20121201s314AF16HK104rt23w09r03	8	AF16.68	AF16	23	12/01/12	3	28.21790612	290	378.838384	0.4677318	0.077078865	0.69889302	0.08831341	1
wormd20121201s314AF16HK104rt23w09r04	8	AF16.68	AF16	23	12/01/12	4	29.27913061	179	354.123656	0.43024445	0.077078865	0.60375735	0.08831341	1
wormd20121201s314AF16HK104rt23w09r05	8	AF16.68	AF16	23	12/01/12	5	30.3403551	235	388.756198	0.52162268	0.077078865	0.6707581	0.08831341	1
wormd20121201s314AF16HK104rt23w09r06	8	AF16.68	AF16	23	12/01/12	6	31.40157959	249	348.641732	0.50576677	0.077078865	0.6751421	0.08831341	1
wormd20121201s314AF16HK104rt23w09r07	8	AF16.68	AF16	23	12/01/12	7	32.46280408	101	275.386792	0.33880604	0.077078865	0.44181303	0.08831341	1
wormd20121201s314AF16HK104rt23w09r08	8	AF16.68	AF16	23	12/01/12	8	33.52402857	192	328.934343	0.33276025	0.077078865	0.57020906	0.08831341	1
wormd20121201s314AF16HK104rt23w09r09	8	AF16.68	AF16	23	12/01/12	9	34.58525306	293	334.92	0.08455032	0.077078865	0.10024171	0.08831341	0
wormd20121201s314AF16HK104rt23w09r10	8	AF16.68	AF16	23	12/01/12	10	35.64647755	293	347.443333	0.12691501	0.077078865	0.46787143	0.08831341	1
wormd20121201s314AF16HK104rt23w09r11	8	AF16.68	AF16	23	12/01/12	11	36.70770204	293	412.79	0.07707887	0.077078865	0.17328754	0.08831341	1
wormd20121201s314AF16HK104rt23w09r12	8	AF16.68	AF16	23	12/01/12	12	37.76892653	283	312.761404	0.09448374	0.077078865	0.16350715	0.08831341	1
wormd20121201s314AF16HK104rt23w09r13	8	AF16.68	AF16	23	12/01/12	13	38.83015102	292	351.392617	0.132857	0.077078865	0.13454803	0.08831341	0
wormd20121201s314AF16HK104rt23w09r14	8	AF16.68	AF16	23	12/01/12	14	39.89137551	291	321.520134	0.12378685	0.077078865	0.12198375	0.08831341	0
wormd20121201s314AF16HK104rt23w09r15	8	AF16.68	AF16	23	12/01/12	15	40.9526	293	373.083333	0.08712762	0.077078865	0.08831341	0.08831341	0
wormd20121201s314AF16HK104rt23w13r00	12	AF16.69	AF16	23	12/01/12	0	25.03423265	268	306.269091	0.59520535	0.086272124	0.61902081	0.085965673	1
wormd20121201s314AF16HK104rt23w13r01	12	AF16.69	AF16	23	12/01/12	1	26.09545714	254	319.046154	0.61439815	0.086272124	0.68983106	0.085965673	1
wormd20121201s314AF16HK104rt23w13r02	12	AF16.69	AF16	23	12/01/12	2	27.15668163	237	333.254098	0.63566505	0.086272124	0.71075596	0.085965673	1
wormd20121201s314AF16HK104rt23w13r03	12	AF16.69	AF16	23	12/01/12	3	28.21790612	290	309.892256	0.66206552	0.086272124	0.7042091	0.085965673	1
wormd20121201s314AF16HK104rt23w13r04	12	AF16.69	AF16	23	12/01/12	4	29.27913061	172	380.189944	0.48800162	0.086272124	0.66230131	0.085965673	1
wormd20121201s314AF16HK104rt23w13r05	12	AF16.69	AF16	23	12/01/12	5	30.3403551	146	331.091503	0.59398015	0.086272124	0.69101524	0.085965673	1
wormd20121201s314AF16HK104rt23w13r06	12	AF16.69	AF16	23	12/01/12	6	31.40157959	126	329.825758	0.50768546	0.086272124	0.74527129	0.085965673	1
wormd20121201s314AF16HK104rt23w13r07	12	AF16.69	AF16	23	12/01/12	7	32.46280408	158	319.582822	0.36321976	0.086272124	0.56912119	0.085965673	1
wormd20121201s314AF16HK104rt23w13r08	12	AF16.69	AF16	23	12/01/12	8	33.52402857	116	361.991803	0.48431632	0.086272124	0.63554521	0.085965673	1
wormd20121201s314AF16HK104rt23w13r09	12	AF16.69	AF16	23	12/01/12	9	34.58525306	293	257.14	0.08890303	0.086272124	0.09169513	0.085965673	0
wormd20121201s314AF16HK104rt23w13r10	12	AF16.69	AF16	23	12/01/12	10	35.64647755	293	273.336667	0.09218952	0.086272124	0.16003289	0.085965673	1
wormd20121201s314AF16HK104rt23w13r11	12	AF16.69	AF16	23	12/01/12	11	36.70770204	293	288.873333	0.09943101	0.086272124	0.15756276	0.085965673	1
wormd20121201s314AF16HK104rt23w13r12	12	AF16.69	AF16	23	12/01/12	12	37.76892653	293	275.536667	0.0894366	0.086272124	0.13847173	0.085965673	0
wormd20121201s314AF16HK104rt23w13r13	12	AF16.69	AF16	23	12/01/12	13	38.83015102	293	263.146667	0.08627212	0.086272124	0.08596567	0.085965673	0
wormd20121201s314AF16HK104rt23w13r14	12	AF16.69	AF16	23	12/01/12	14	39.89137551	293	264.923333	0.09748911	0.086272124	0.09585695	0.085965673	0
wormd20121201s314AF16HK104rt23w13r15	12	AF16.69	AF16	23	12/01/12	15	40.9526	290	331.111111	0.13498587	0.086272124	0.13548292	0.085965673	0
wormd20121201s314AF16HK104rt23w14r00	13	AF16.70	AF16	23	12/01/12	0	25.03423265	281	330.541667	0.62832723	0.00905612	0.71631095	0.009703573	1
wormd20121201s314AF16HK104rt23w14r01	13	AF16.70	AF16	23	12/01/12	1	26.09545714	275	332.820144	0.52123119	0.00905612	0.73713935	0.009703573	1
wormd20121201s314AF16HK104rt23w14r02	13	AF16.70	AF16	23	12/01/12	2	27.15668163	167	276.641176	0.55888812	0.00905612	0.75759762	0.009703573	1
wormd20121201s314AF16HK104rt23w14r03	13	AF16.70	AF16	23	12/01/12	3	28.21790612	220	328.321586	0.57398036	0.00905612	0.76480876	0.009703573	1
wormd20121201s314AF16HK104rt23w14r04	13	AF16.70	AF16	23	12/01/12	4	29.27913061	132	301.676259	0.62354194	0.00905612	0.75478282	0.009703573	1
wormd20121201s314AF16HK104rt23w14r05	13	AF16.70	AF16	23	12/01/12	5	30.3403551	164	301.497076	0.43966568	0.00905612	0.65233174	0.009703573	1
wormd20121201s314AF16HK104rt23w14r06	13	AF16.70	AF16	23	12/01/12	6	31.40157959	152	265.934524	0.55470118	0.00905612	0.74020505	0.009703573	1
wormd20121201s314AF16HK104rt23w14r07	13	AF16.70	AF16	23	12/01/12	7	32.46280408	154	279.220126	0.43007266	0.00905612	0.61342855	0.009703573	1
wormd20121201s314AF16HK104rt23w14r08	13	AF16.70	AF16	23	12/01/12	8	33.52402857	265	254.191176	0.08884436	0.00905612	0.11675976	0.009703573	0
wormd20121201s314AF16HK104rt23w14r09	13	AF16.70	AF16	23	12/01/12	9	34.58525306	196	250.807882	0.15958988	0.00905612	0.59621238	0.009703573	1
wormd20121201s314AF16HK104rt23w14r10	13	AF16.70	AF16	23	12/01/12	10	35.64647755	244	245.334661	0.09396501	0.00905612	0.1459323	0.009703573	1
wormd20121201s314AF16HK104rt23w14r11	13	AF16.70	AF16	23	12/01/12	11	36.70770204	232	233.610169	0.08106909	0.00905612	0.17431533	0.009703573	1
wormd20121201s314AF16HK104rt23w14r12	13	AF16.70	AF16	23	12/01/12	12	37.76892653	169	102.982955	0.02612751	0.00905612	0.04126825	0.009703573	0
wormd20121201s314AF16HK104rt23w14r13	13	AF16.70	AF16	23	12/01/12	13	38.83015102	267	67.810219	0.00962724	0.00905612	0.01161786	0.009703573	0
wormd20121201s314AF16HK104rt23w14r14	13	AF16.70	AF16	23	12/01/12	14	39.89137551	257	68.0113636	0.00905612	0.00905612	0.00970357	0.009703573	0
wormd20121201s314AF16HK104rt23w14r15	13	AF16.70	AF16	23	12/01/12	15	40.9526	260	333.018868	0.10627923	0.00905612	0.10685323	0.009703573	0
wormd20121201s314AF16HK104rt23w15r00	14	AF16.71	AF16	23	12/01/12	0	25.03423265	207	418.477064	0.52563202	0.070844192	0.60986753	0.072197404	1
wormd20121201s314AF16HK104rt23w15r01	14	AF16.71	AF16	23	12/01/12	1	26.09545714	193	399.795	0.57778757	0.070844192	0.62167754	0.072197404	1
wormd20121201s314AF16HK104rt23w15r02	14	AF16.71	AF16	23	12/01/12	2	27.15668163	283	418.731034	0.53683203	0.070844192	0.68121379	0.072197404	1
wormd20121201s314AF16HK104rt23w15r03	14	AF16.71	AF16	23	12/01/12	3	28.21790612	170	420.988506	0.55630005	0.070844192	0.64575279	0.072197404	1
wormd20121201s314AF16HK104rt23w15r05	14	AF16.71	AF16	23	12/01/12	5	30.3403551	292	414.317726	0.48050025	0.070844192	0.73369415	0.072197404	1
wormd20121201s314AF16HK104rt23w15r06	14	AF16.71	AF16	23	12/01/12	6	31.40157959	228	418.745098	0.58042784	0.070844192	0.70081575	0.072197404	1
wormd20121201s314AF16HK104rt23w15r07	14	AF16.71	AF16	23	12/01/12	7	32.46280408	293	410.046667	0.52047033	0.070844192	0.73711113	0.072197404	1
wormd20121201s314AF16HK104rt23w15r08	14	AF16.71	AF16	23	12/01/12	8	33.52402857	293	416.49	0.47522393	0.070844192	0.73229761	0.072197404	1
wormd20121201s314AF16HK104rt23w15r09	14	AF16.71	AF16	23	12/01/12	9	34.58525306	293	395.753333	0.30285916	0.070844192	0.6118133	0.072197404	1
wormd20121201s314AF16HK104rt23w15r10	14	AF16.71	AF16	23	12/01/12	10	35.64647755	293	440.296667	0.07156114	0.070844192	0.10901464	0.072197404	0
wormd20121201s314AF16HK104rt23w15r11	14	AF16.71	AF16	23	12/01/12	11	36.70770204	293	399.97	0.08010144	0.070844192	0.26125196	0.072197404	1
wormd20121201s314AF16HK104rt23w15r12	14	AF16.71	AF16	23	12/01/12	12	37.76892653	293	384.733333	0.08113954	0.070844192	0.08225339	0.072197404	0
wormd20121201s314AF16HK104rt23w15r13	14	AF16.71	AF16	23	12/01/12	13	38.83015102	293	373.046667	0.07084419	0.070844192	0.0721974	0.072197404	0
wormd20121201s314AF16HK104rt23w15r14	14	AF16.71	AF16	23	12/01/12	14	39.89137551	293	362.216667	0.07394699	0.070844192	0.07318116	0.072197404	0
wormd20121201s314AF16HK104rt23w15r15	14	AF16.71	AF16	23	12/01/12	15	40.9526	293	355.89	0.0765639	0.070844192	0.07620302	0.072197404	0
wormd20121202s373PB1203AF16rt23w04r00	3	AF16.72	AF16	23	12/02/12	0	25.03423265	293	584.876667	0.37945524	0.058240608	0.66326016	0.060095183	1
wormd20121202s373PB1203AF16rt23w04r01	3	AF16.72	AF16	23	12/02/12	1	26.09545714	214	532.575342	0.45230144	0.058240608	0.51379178	0.060095183	1
wormd20121202s373PB1203AF16rt23w04r02	3	AF16.72	AF16	23	12/02/12	2	27.15668163	181	303.580645	0.13178515	0.058240608	0.13851943	0.060095183	0
wormd20121202s373PB1203AF16rt23w04r03	3	AF16.72	AF16	23	12/02/12	3	28.21790612	193	317.165	0.0912743	0.058240608	0.10015038	0.060095183	0
wormd20121202s373PB1203AF16rt23w04r04	3	AF16.72	AF16	23	12/02/12	4	29.27913061	249	378.921569	0.13594332	0.058240608	0.21453047	0.060095183	1
wormd20121202s373PB1203AF16rt23w04r05	3	AF16.72	AF16	23	12/02/12	5	30.3403551	225	353.211207	0.07438989	0.058240608	0.07503876	0.060095183	0
wormd20121202s373PB1203AF16rt23w04r06	3	AF16.72	AF16	23	12/02/12	6	31.40157959	214	554.701357	0.43945263	0.058240608	0.48058127	0.060095183	1
wormd20121202s373PB1203AF16rt23w04r08	3	AF16.72	AF16	23	12/02/12	8	33.52402857	159	551.742105	0.41955297	0.058240608	0.56081231	0.060095183	1
wormd20121202s373PB1203AF16rt23w04r09	3	AF16.72	AF16	23	12/02/12	9	34.58525306	184	590.329897	0.10067879	0.058240608	0.32892838	0.060095183	1
wormd20121202s373PB1203AF16rt23w04r12	3	AF16.72	AF16	23	12/02/12	12	37.76892653	293	534.563333	0.05824061	0.058240608	0.06024643	0.060095183	0
wormd20121202s373PB1203AF16rt23w04r13	3	AF16.72	AF16	23	12/02/12	13	38.83015102	293	531.233333	0.05877041	0.058240608	0.06009518	0.060095183	0
wormd20121202s373PB1203AF16rt23w04r14	3	AF16.72	AF16	23	12/02/12	14	39.89137551	293	532.646667	0.06072331	0.058240608	0.06122692	0.060095183	0
wormd20121202s373PB1203AF16rt23w04r15	3	AF16.72	AF16	23	12/02/12	15	40.9526	293	533.7	0.0602159	0.058240608	0.06017577	0.060095183	0
wormd20121202s373PB1203AF16rt23w05r00	4	AF16.73	AF16	23	12/02/12	0	25.03423265	293	514.253333	0.37087143	0.056017832	0.5112601	0.055219654	1
wormd20121202s373PB1203AF16rt23w05r01	4	AF16.73	AF16	23	12/02/12	1	26.09545714	293	513.5	0.39851873	0.056017832	0.47880664	0.055219654	1
wormd20121202s373PB1203AF16rt23w05r02	4	AF16.73	AF16	23	12/02/12	2	27.15668163	293	534.376667	0.39133678	0.056017832	0.49329267	0.055219654	1
wormd20121202s373PB1203AF16rt23w05r03	4	AF16.73	AF16	23	12/02/12	3	28.21790612	167	458.369942	0.39343603	0.056017832	0.50173204	0.055219654	1
wormd20121202s373PB1203AF16rt23w05r04	4	AF16.73	AF16	23	12/02/12	4	29.27913061	157	339.164634	0.28250109	0.056017832	0.29197505	0.055219654	1
wormd20121202s373PB1203AF16rt23w05r05	4	AF16.73	AF16	23	12/02/12	5	30.3403551	293	491.5	0.33506626	0.056017832	0.62945044	0.055219654	1
wormd20121202s373PB1203AF16rt23w05r09	4	AF16.73	AF16	23	12/02/12	9	34.58525306	293	515.146667	0.06581628	0.056017832	0.14626	0.055219654	1
wormd20121202s373PB1203AF16rt23w05r10	4	AF16.73	AF16	23	12/02/12	10	35.64647755	290	552.30303	0.06314363	0.056017832	0.12594771	0.055219654	0
wormd20121202s373PB1203AF16rt23w05r11	4	AF16.73	AF16	23	12/02/12	11	36.70770204	293	564.106667	0.05752428	0.056017832	0.08228214	0.055219654	0
wormd20121202s373PB1203AF16rt23w05r12	4	AF16.73	AF16	23	12/02/12	12	37.76892653	293	555.31	0.05704782	0.056017832	0.05757483	0.055219654	0
wormd20121202s373PB1203AF16rt23w05r13	4	AF16.73	AF16	23	12/02/12	13	38.83015102	293	549.896667	0.0578354	0.056017832	0.05766352	0.055219654	0
wormd20121202s373PB1203AF16rt23w05r14	4	AF16.73	AF16	23	12/02/12	14	39.89137551	293	546.32	0.05642205	0.056017832	0.0559688	0.055219654	0
wormd20121202s373PB1203AF16rt23w05r15	4	AF16.73	AF16	23	12/02/12	15	40.9526	293	542.733333	0.05601783	0.056017832	0.05521965	0.055219654	0
wormd20121202s373PB1203AF16rt23w06r00	5	AF16.74	AF16	23	12/02/12	0	25.03423265	267	430.824818	0.4528258	0.069744323	0.63005021	0.071247401	1
wormd20121202s373PB1203AF16rt23w06r01	5	AF16.74	AF16	23	12/02/12	1	26.09545714	260	416.337079	0.44875028	0.069744323	0.62614928	0.071247401	1
wormd20121202s373PB1203AF16rt23w06r02	5	AF16.74	AF16	23	12/02/12	2	27.15668163	211	444.050459	0.43265632	0.069744323	0.58173672	0.071247401	1
wormd20121202s373PB1203AF16rt23w06r03	5	AF16.74	AF16	23	12/02/12	3	28.21790612	119	324.341463	0.35607337	0.069744323	0.49512214	0.071247401	1
wormd20121202s373PB1203AF16rt23w06r04	5	AF16.74	AF16	23	12/02/12	4	29.27913061	198	418.453659	0.40847031	0.069744323	0.67829094	0.071247401	1
wormd20121202s373PB1203AF16rt23w06r06	5	AF16.74	AF16	23	12/02/12	6	31.40157959	188	477.795812	0.30266921	0.069744323	0.57078978	0.071247401	1
wormd20121202s373PB1203AF16rt23w06r09	5	AF16.74	AF16	23	12/02/12	9	34.58525306	227	488.831897	0.07175703	0.069744323	0.07608407	0.071247401	0
wormd20121202s373PB1203AF16rt23w06r10	5	AF16.74	AF16	23	12/02/12	10	35.64647755	212	434.488479	0.07699962	0.069744323	0.15435694	0.071247401	1
wormd20121202s373PB1203AF16rt23w06r11	5	AF16.74	AF16	23	12/02/12	11	36.70770204	275	427.964539	0.1112023	0.069744323	0.19990619	0.071247401	1
wormd20121202s373PB1203AF16rt23w06r12	5	AF16.74	AF16	23	12/02/12	12	37.76892653	284	375.065292	0.09921238	0.069744323	0.11141589	0.071247401	0
wormd20121202s373PB1203AF16rt23w06r13	5	AF16.74	AF16	23	12/02/12	13	38.83015102	287	403.340136	0.08737084	0.069744323	0.0886306	0.071247401	0
wormd20121202s373PB1203AF16rt23w06r14	5	AF16.74	AF16	23	12/02/12	14	39.89137551	287	355.921769	0.07089998	0.069744323	0.07211361	0.071247401	0
wormd20121202s373PB1203AF16rt23w06r15	5	AF16.74	AF16	23	12/02/12	15	40.9526	293	363.126667	0.06974432	0.069744323	0.0712474	0.071247401	0
wormd20121202s373PB1203AF16rt23w10r00	9	AF16.75	AF16	23	12/02/12	0	25.03423265	258	424.288973	0.46054089	0.069725131	0.54510562	0.068291306	1
wormd20121202s373PB1203AF16rt23w10r01	9	AF16.75	AF16	23	12/02/12	1	26.09545714	248	467.048	0.50427642	0.069725131	0.55622813	0.068291306	1
wormd20121202s373PB1203AF16rt23w10r03	9	AF16.75	AF16	23	12/02/12	3	28.21790612	230	83.7932489	0.06972513	0.069725131	0.06829131	0.068291306	0
wormd20121202s373PB1203AF16rt23w10r04	9	AF16.75	AF16	23	12/02/12	4	29.27913061	246	460.095238	0.5259175	0.069725131	0.70988786	0.068291306	1
wormd20121202s373PB1203AF16rt23w10r05	9	AF16.75	AF16	23	12/02/12	5	30.3403551	256	459.847909	0.60473706	0.069725131	0.71974493	0.068291306	1
wormd20121202s373PB1203AF16rt23w10r07	9	AF16.75	AF16	23	12/02/12	7	32.46280408	222	491.9	0.56069941	0.069725131	0.70732812	0.068291306	1
wormd20121202s373PB1203AF16rt23w10r08	9	AF16.75	AF16	23	12/02/12	8	33.52402857	200	477.71875	0.54892139	0.069725131	0.68729841	0.068291306	1
wormd20121202s373PB1203AF16rt23w10r09	9	AF16.75	AF16	23	12/02/12	9	34.58525306	254	429.75	0.0812413	0.069725131	0.11420934	0.068291306	0
wormd20121202s373PB1203AF16rt23w10r10	9	AF16.75	AF16	23	12/02/12	10	35.64647755	255	411.406716	0.20024655	0.069725131	0.55173986	0.068291306	1
wormd20121202s373PB1203AF16rt23w10r11	9	AF16.75	AF16	23	12/02/12	11	36.70770204	203	448.208178	0.09906072	0.069725131	0.13063596	0.068291306	0
wormd20121202s373PB1203AF16rt23w10r12	9	AF16.75	AF16	23	12/02/12	12	37.76892653	293	430.796667	0.08393542	0.069725131	0.18558088	0.068291306	1
wormd20121202s373PB1203AF16rt23w10r13	9	AF16.75	AF16	23	12/02/12	13	38.83015102	293	399.726667	0.07361913	0.069725131	0.07538826	0.068291306	0
wormd20121202s373PB1203AF16rt23w10r14	9	AF16.75	AF16	23	12/02/12	14	39.89137551	293	394.403333	0.07604056	0.069725131	0.07661647	0.068291306	0
wormd20121202s373PB1203AF16rt23w10r15	9	AF16.75	AF16	23	12/02/12	15	40.9526	293	394.713333	0.0776086	0.069725131	0.07768357	0.068291306	0
wormd20121202s373PB1203AF16rt23w11r00	10	AF16.76	AF16	23	12/02/12	0	25.03423265	293	516.03	0.41703749	0.059782141	0.60474999	0.060488914	1
wormd20121202s373PB1203AF16rt23w11r01	10	AF16.76	AF16	23	12/02/12	1	26.09545714	293	542.34	0.45120665	0.059782141	0.53101579	0.060488914	1
wormd20121202s373PB1203AF16rt23w11r02	10	AF16.76	AF16	23	12/02/12	2	27.15668163	293	527.346667	0.47226911	0.059782141	0.55006152	0.060488914	1
wormd20121202s373PB1203AF16rt23w11r03	10	AF16.76	AF16	23	12/02/12	3	28.21790612	102	509.015873	0.30564092	0.059782141	0.59065528	0.060488914	1
wormd20121202s373PB1203AF16rt23w11r04	10	AF16.76	AF16	23	12/02/12	4	29.27913061	265	538.003676	0.47147885	0.059782141	0.65052469	0.060488914	1
wormd20121202s373PB1203AF16rt23w11r09	10	AF16.76	AF16	23	12/02/12	9	34.58525306	231	600.06639	0.06636709	0.059782141	0.07717613	0.060488914	0
wormd20121202s373PB1203AF16rt23w11r11	10	AF16.76	AF16	23	12/02/12	11	36.70770204	293	499.11	0.07841458	0.059782141	0.23703397	0.060488914	1
wormd20121202s373PB1203AF16rt23w11r12	10	AF16.76	AF16	23	12/02/12	12	37.76892653	293	466.013333	0.05978214	0.059782141	0.06048891	0.060488914	0
wormd20121202s373PB1203AF16rt23w11r13	10	AF16.76	AF16	23	12/02/12	13	38.83015102	293	480.65	0.0607748	0.059782141	0.06250525	0.060488914	0
wormd20121202s373PB1203AF16rt23w11r14	10	AF16.76	AF16	23	12/02/12	14	39.89137551	293	482.846667	0.06055943	0.059782141	0.06085904	0.060488914	0
wormd20121202s373PB1203AF16rt23w11r15	10	AF16.76	AF16	23	12/02/12	15	40.9526	293	487.57	0.06064141	0.059782141	0.06147777	0.060488914	0
wormd20121202s373PB1203AF16rt23w12r00	11	AF16.77	AF16	23	12/02/12	0	25.03423265	267	557.469534	0.47149009	0.053096294	0.59587852	0.053699017	1
wormd20121202s373PB1203AF16rt23w12r01	11	AF16.77	AF16	23	12/02/12	1	26.09545714	171	604.502732	0.47847013	0.053096294	0.62045602	0.053699017	1
wormd20121202s373PB1203AF16rt23w12r03	11	AF16.77	AF16	23	12/02/12	3	28.21790612	158	518.509091	0.40272922	0.053096294	0.64766033	0.053699017	1
wormd20121202s373PB1203AF16rt23w12r05	11	AF16.77	AF16	23	12/02/12	5	30.3403551	125	568.878788	0.34597647	0.053096294	0.6635122	0.053699017	1
wormd20121202s373PB1203AF16rt23w12r06	11	AF16.77	AF16	23	12/02/12	6	31.40157959	187	570.244792	0.5759476	0.053096294	0.73503709	0.053699017	1
wormd20121202s373PB1203AF16rt23w12r09	11	AF16.77	AF16	23	12/02/12	9	34.58525306	259	125.522556	0.10343506	0.053096294	0.10541756	0.053699017	0
wormd20121202s373PB1203AF16rt23w12r10	11	AF16.77	AF16	23	12/02/12	10	35.64647755	285	666.743151	0.10314007	0.053096294	0.32974294	0.053699017	1
wormd20121202s373PB1203AF16rt23w12r11	11	AF16.77	AF16	23	12/02/12	11	36.70770204	293	592.85	0.06376039	0.053096294	0.08607733	0.053699017	0
wormd20121202s373PB1203AF16rt23w12r12	11	AF16.77	AF16	23	12/02/12	12	37.76892653	293	647.76	0.06466656	0.053096294	0.0737292	0.053699017	0
wormd20121202s373PB1203AF16rt23w12r13	11	AF16.77	AF16	23	12/02/12	13	38.83015102	293	554.003333	0.05952185	0.053096294	0.06012494	0.053699017	0
wormd20121202s373PB1203AF16rt23w12r14	11	AF16.77	AF16	23	12/02/12	14	39.89137551	293	607.44	0.05309629	0.053096294	0.05369902	0.053699017	0
wormd20121202s373PB1203AF16rt23w12r15	11	AF16.77	AF16	23	12/02/12	15	40.9526	293	612.25	0.05734849	0.053096294	0.05683742	0.053699017	0
wormd20121202s373PB1203AF16rt23w16r00	15	AF16.78	AF16	23	12/02/12	0	25.03423265	293	536.183333	0.40546754	0.068188736	0.49511588	0.068674605	1
wormd20121202s373PB1203AF16rt23w16r01	15	AF16.78	AF16	23	12/02/12	1	26.09545714	163	408.412791	0.36803209	0.068188736	0.3630537	0.068674605	1
wormd20121202s373PB1203AF16rt23w16r02	15	AF16.78	AF16	23	12/02/12	2	27.15668163	205	522.778302	0.4367294	0.068188736	0.48740097	0.068674605	1
wormd20121202s373PB1203AF16rt23w16r04	15	AF16.78	AF16	23	12/02/12	4	29.27913061	103	539.365854	0.4058112	0.068188736	0.51066653	0.068674605	1
wormd20121202s373PB1203AF16rt23w16r07	15	AF16.78	AF16	23	12/02/12	7	32.46280408	163	514.776042	0.35956281	0.068188736	0.3455272	0.068674605	1
wormd20121202s373PB1203AF16rt23w16r09	15	AF16.78	AF16	23	12/02/12	9	34.58525306	286	509.927083	0.12016962	0.068188736	0.35108703	0.068674605	1
wormd20121202s373PB1203AF16rt23w16r10	15	AF16.78	AF16	23	12/02/12	10	35.64647755	293	525.976667	0.09413981	0.068188736	0.31830035	0.068674605	1
wormd20121202s373PB1203AF16rt23w16r11	15	AF16.78	AF16	23	12/02/12	11	36.70770204	293	560.94	0.07267203	0.068188736	0.10015302	0.068674605	0
wormd20121202s373PB1203AF16rt23w16r12	15	AF16.78	AF16	23	12/02/12	12	37.76892653	293	566.266667	0.06818874	0.068188736	0.06867461	0.068674605	0
wormd20121202s373PB1203AF16rt23w16r13	15	AF16.78	AF16	23	12/02/12	13	38.83015102	293	562.7	0.06991002	0.068188736	0.07110684	0.068674605	0
wormd20121202s373PB1203AF16rt23w16r14	15	AF16.78	AF16	23	12/02/12	14	39.89137551	293	543.796667	0.071985	0.068188736	0.07179653	0.068674605	0
wormd20121202s373PB1203AF16rt23w16r15	15	AF16.78	AF16	23	12/02/12	15	40.9526	293	494.293333	0.07394226	0.068188736	0.07318146	0.068674605	0
wormd20121202s373PB1203AF16rt23w17r00	16	AF16.79	AF16	23	12/02/12	0	25.03423265	269	417.84058	0.42850483	0.067839396	0.52116622	0.06854198	1
wormd20121202s373PB1203AF16rt23w17r01	16	AF16.79	AF16	23	12/02/12	1	26.09545714	246	431.363636	0.45320369	0.067839396	0.6536029	0.06854198	1
wormd20121202s373PB1203AF16rt23w17r02	16	AF16.79	AF16	23	12/02/12	2	27.15668163	116	416.991667	0.53789135	0.067839396	0.60013942	0.06854198	1
wormd20121202s373PB1203AF16rt23w17r03	16	AF16.79	AF16	23	12/02/12	3	28.21790612	187	431.703125	0.61955356	0.067839396	0.70429273	0.06854198	1
wormd20121202s373PB1203AF16rt23w17r05	16	AF16.79	AF16	23	12/02/12	5	30.3403551	156	435.429379	0.08628746	0.067839396	0.21827344	0.06854198	1
wormd20121202s373PB1203AF16rt23w17r06	16	AF16.79	AF16	23	12/02/12	6	31.40157959	219	444.053097	0.54558104	0.067839396	0.66219692	0.06854198	1
wormd20121202s373PB1203AF16rt23w17r08	16	AF16.79	AF16	23	12/02/12	8	33.52402857	293	362	0.09617459	0.067839396	0.19317621	0.06854198	1
wormd20121202s373PB1203AF16rt23w17r09	16	AF16.79	AF16	23	12/02/12	9	34.58525306	293	458.673333	0.13409476	0.067839396	0.52616874	0.06854198	1
wormd20121202s373PB1203AF16rt23w17r10	16	AF16.79	AF16	23	12/02/12	10	35.64647755	293	449.786667	0.08561263	0.067839396	0.25062227	0.06854198	1
wormd20121202s373PB1203AF16rt23w17r11	16	AF16.79	AF16	23	12/02/12	11	36.70770204	293	478.556667	0.08212997	0.067839396	0.17570759	0.06854198	1
wormd20121202s373PB1203AF16rt23w17r12	16	AF16.79	AF16	23	12/02/12	12	37.76892653	293	482.866667	0.07092019	0.067839396	0.09636957	0.06854198	0
wormd20121202s373PB1203AF16rt23w17r13	16	AF16.79	AF16	23	12/02/12	13	38.83015102	293	442.086667	0.0678394	0.067839396	0.06854198	0.06854198	0
wormd20121202s373PB1203AF16rt23w17r14	16	AF16.79	AF16	23	12/02/12	14	39.89137551	293	409.043333	0.06832218	0.067839396	0.06928992	0.06854198	0
wormd20121202s373PB1203AF16rt23w17r15	16	AF16.79	AF16	23	12/02/12	15	40.9526	293	416.923333	0.07553008	0.067839396	0.07627361	0.06854198	0
wormd20121202s373PB1203AF16rt23w18r00	17	AF16.80	AF16	23	12/02/12	0	25.03423265	293	468.933333	0.44089597	0.061196704	0.62742488	0.062593691	1
wormd20121202s373PB1203AF16rt23w18r01	17	AF16.80	AF16	23	12/02/12	1	26.09545714	293	466.07	0.50465952	0.061196704	0.56262125	0.062593691	1
wormd20121202s373PB1203AF16rt23w18r02	17	AF16.80	AF16	23	12/02/12	2	27.15668163	246	437.048193	0.51413277	0.061196704	0.65431256	0.062593691	1
wormd20121202s373PB1203AF16rt23w18r03	17	AF16.80	AF16	23	12/02/12	3	28.21790612	281	476.916667	0.5657291	0.061196704	0.67010074	0.062593691	1
wormd20121202s373PB1203AF16rt23w18r04	17	AF16.80	AF16	23	12/02/12	4	29.27913061	216	493	0.52917128	0.061196704	0.66675316	0.062593691	1
wormd20121202s373PB1203AF16rt23w18r05	17	AF16.80	AF16	23	12/02/12	5	30.3403551	235	405.107884	0.46099389	0.061196704	0.67439022	0.062593691	1
wormd20121202s373PB1203AF16rt23w18r06	17	AF16.80	AF16	23	12/02/12	6	31.40157959	236	519.589212	0.54695923	0.061196704	0.58993652	0.062593691	1
wormd20121202s373PB1203AF16rt23w18r09	17	AF16.80	AF16	23	12/02/12	9	34.58525306	161	419.136905	0.35487547	0.061196704	0.67441919	0.062593691	1
wormd20121202s373PB1203AF16rt23w18r10	17	AF16.80	AF16	23	12/02/12	10	35.64647755	275	382.056738	0.08496663	0.061196704	0.18749193	0.062593691	1
wormd20121202s373PB1203AF16rt23w18r11	17	AF16.80	AF16	23	12/02/12	11	36.70770204	293	399.566667	0.08336962	0.061196704	0.28590452	0.062593691	1
wormd20121202s373PB1203AF16rt23w18r12	17	AF16.80	AF16	23	12/02/12	12	37.76892653	293	374.523333	0.06258895	0.061196704	0.06404232	0.062593691	0
wormd20121202s373PB1203AF16rt23w18r13	17	AF16.80	AF16	23	12/02/12	13	38.83015102	293	391.833333	0.06186115	0.061196704	0.06259369	0.062593691	0
wormd20121202s373PB1203AF16rt23w18r14	17	AF16.80	AF16	23	12/02/12	14	39.89137551	293	424	0.0611967	0.061196704	0.06293832	0.062593691	0
wormd20121202s373PB1203AF16rt23w18r15	17	AF16.80	AF16	23	12/02/12	15	40.9526	293	425.206667	0.06369233	0.061196704	0.06366364	0.062593691	0
wormd20121221s59PB1283AF16rt23w04r00	3	AF16.81	AF16	23	12/21/12	0	25.03423265	287	354.928571	0.5218808	0.08884952	0.63728767	0.088317665	1
wormd20121221s59PB1283AF16rt23w04r01	3	AF16.81	AF16	23	12/21/12	1	26.09545714	293	361.27	0.5099033	0.08884952	0.61085907	0.088317665	1
wormd20121221s59PB1283AF16rt23w04r03	3	AF16.81	AF16	23	12/21/12	3	28.21790612	234	378.568465	0.54480582	0.08884952	0.72227481	0.088317665	1
wormd20121221s59PB1283AF16rt23w04r04	3	AF16.81	AF16	23	12/21/12	4	29.27913061	137	373.521429	0.55714558	0.08884952	0.71190231	0.088317665	1
wormd20121221s59PB1283AF16rt23w04r06	3	AF16.81	AF16	23	12/21/12	6	31.40157959	208	386.347826	0.44433856	0.08884952	0.68215659	0.088317665	1
wormd20121221s59PB1283AF16rt23w04r10	3	AF16.81	AF16	23	12/21/12	10	35.64647755	178	102.762162	0.08884952	0.08884952	0.10957801	0.088317665	0
wormd20121221s59PB1283AF16rt23w04r11	3	AF16.81	AF16	23	12/21/12	11	36.70770204	236	67.083682	0.09195378	0.08884952	0.09306953	0.088317665	0
wormd20121221s59PB1283AF16rt23w04r12	3	AF16.81	AF16	23	12/21/12	12	37.76892653	244	65.8117647	0.08962038	0.08884952	0.08831767	0.088317665	0
wormd20121221s59PB1283AF16rt23w04r13	3	AF16.81	AF16	23	12/21/12	13	38.83015102	216	272.175966	0.10789639	0.08884952	0.11099889	0.088317665	0
wormd20121221s59PB1283AF16rt23w04r14	3	AF16.81	AF16	23	12/21/12	14	39.89137551	225	64.08	0.09355103	0.08884952	0.09106275	0.088317665	0
wormd20121221s59PB1283AF16rt23w04r15	3	AF16.81	AF16	23	12/21/12	15	40.9526	215	65.8387097	0.09717591	0.08884952	0.09831856	0.088317665	0
wormd20121221s59PB1283AF16rt23w05r00	4	AF16.82	AF16	23	12/21/12	0	25.03423265	292	323.257525	0.51715315	0.10974267	0.6217039	0.110522421	1
wormd20121221s59PB1283AF16rt23w05r01	4	AF16.82	AF16	23	12/21/12	1	26.09545714	293	337.193333	0.56465215	0.10974267	0.6871162	0.110522421	1
wormd20121221s59PB1283AF16rt23w05r02	4	AF16.82	AF16	23	12/21/12	2	27.15668163	125	270.992424	0.53004027	0.10974267	0.6927265	0.110522421	1
wormd20121221s59PB1283AF16rt23w05r03	4	AF16.82	AF16	23	12/21/12	3	28.21790612	217	316.767857	0.59232637	0.10974267	0.7040522	0.110522421	1
wormd20121221s59PB1283AF16rt23w05r04	4	AF16.82	AF16	23	12/21/12	4	29.27913061	213	294.339535	0.60749812	0.10974267	0.70106006	0.110522421	1
wormd20121221s59PB1283AF16rt23w05r06	4	AF16.82	AF16	23	12/21/12	6	31.40157959	194	278.293532	0.65295109	0.10974267	0.74135681	0.110522421	1
wormd20121221s59PB1283AF16rt23w05r09	4	AF16.82	AF16	23	12/21/12	9	34.58525306	236	321.270833	0.11018397	0.10974267	0.17000945	0.110522421	1
wormd20121221s59PB1283AF16rt23w05r10	4	AF16.82	AF16	23	12/21/12	10	35.64647755	213	334.364055	0.11549462	0.10974267	0.22244835	0.110522421	1
wormd20121221s59PB1283AF16rt23w05r11	4	AF16.82	AF16	23	12/21/12	11	36.70770204	239	304.147541	0.10974267	0.10974267	0.1722461	0.110522421	1
wormd20121221s59PB1283AF16rt23w05r12	4	AF16.82	AF16	23	12/21/12	12	37.76892653	293	297.033333	0.11024157	0.10974267	0.11052242	0.110522421	0
wormd20121221s59PB1283AF16rt23w05r13	4	AF16.82	AF16	23	12/21/12	13	38.83015102	293	320.363333	0.12367754	0.10974267	0.12853396	0.110522421	0
wormd20121221s59PB1283AF16rt23w06r00	5	AF16.83	AF16	23	12/21/12	0	25.03423265	287	361.849829	0.55137992	0.006906976	0.65800296	0.006758024	1
wormd20121221s59PB1283AF16rt23w06r01	5	AF16.83	AF16	23	12/21/12	1	26.09545714	271	447.119565	0.4837344	0.006906976	0.61958648	0.006758024	1
wormd20121221s59PB1283AF16rt23w06r02	5	AF16.83	AF16	23	12/21/12	2	27.15668163	277	428.763251	0.5135236	0.006906976	0.66477842	0.006758024	1
wormd20121221s59PB1283AF16rt23w06r03	5	AF16.83	AF16	23	12/21/12	3	28.21790612	285	317.736301	0.54375156	0.006906976	0.78088747	0.006758024	1
wormd20121221s59PB1283AF16rt23w06r04	5	AF16.83	AF16	23	12/21/12	4	29.27913061	113	418.858333	0.39433738	0.006906976	0.62083288	0.006758024	1
wormd20121221s59PB1283AF16rt23w06r05	5	AF16.83	AF16	23	12/21/12	5	30.3403551	168	341.213873	0.50067722	0.006906976	0.59502788	0.006758024	1
wormd20121221s59PB1283AF16rt23w06r06	5	AF16.83	AF16	23	12/21/12	6	31.40157959	266	364.840741	0.46987769	0.006906976	0.6873784	0.006758024	1
wormd20121221s59PB1283AF16rt23w06r07	5	AF16.83	AF16	23	12/21/12	7	32.46280408	278	345.592982	0.49467253	0.006906976	0.73769275	0.006758024	1
wormd20121221s59PB1283AF16rt23w06r08	5	AF16.83	AF16	23	12/21/12	8	33.52402857	124	371	0.39421402	0.006906976	0.66019724	0.006758024	1
wormd20121221s59PB1283AF16rt23w06r09	5	AF16.83	AF16	23	12/21/12	9	34.58525306	287	70.5612245	0.00690698	0.006906976	0.00675802	0.006758024	0
wormd20121221s59PB1283AF16rt23w06r10	5	AF16.83	AF16	23	12/21/12	10	35.64647755	235	114.053719	0.02857412	0.006906976	0.06085568	0.006758024	0
wormd20121221s59PB1283AF16rt23w06r11	5	AF16.83	AF16	23	12/21/12	11	36.70770204	293	345.403333	0.07009089	0.006906976	0.07346524	0.006758024	0
wormd20121221s59PB1283AF16rt23w06r12	5	AF16.83	AF16	23	12/21/12	12	37.76892653	293	356.933333	0.0705405	0.006906976	0.07373431	0.006758024	0
wormd20121221s59PB1283AF16rt23w06r13	5	AF16.83	AF16	23	12/21/12	13	38.83015102	293	327.223333	0.07875083	0.006906976	0.07934852	0.006758024	0
wormd20121221s59PB1283AF16rt23w06r14	5	AF16.83	AF16	23	12/21/12	14	39.89137551	293	336.433333	0.08096416	0.006906976	0.08148224	0.006758024	0
wormd20121221s59PB1283AF16rt23w06r15	5	AF16.83	AF16	23	12/21/12	15	40.9526	293	333.693333	0.08636618	0.006906976	0.0867088	0.006758024	0
wormd20121221s59PB1283AF16rt23w10r00	9	AF16.84	AF16	23	12/21/12	0	25.03423265	283	403.431034	0.49511819	0.068309802	0.61863436	0.090526643	1
wormd20121221s59PB1283AF16rt23w10r01	9	AF16.84	AF16	23	12/21/12	1	26.09545714	293	419.306667	0.53029477	0.068309802	0.62892048	0.090526643	1
wormd20121221s59PB1283AF16rt23w10r08	9	AF16.84	AF16	23	12/21/12	8	33.52402857	261	394.758741	0.08621409	0.068309802	0.10244876	0.090526643	0
wormd20121221s59PB1283AF16rt23w10r11	9	AF16.84	AF16	23	12/21/12	11	36.70770204	107	268.774011	0.0683098	0.068309802	0.09162936	0.090526643	0
wormd20121221s59PB1283AF16rt23w10r12	9	AF16.84	AF16	23	12/21/12	12	37.76892653	293	395.52	0.09061888	0.068309802	0.10123456	0.090526643	0
wormd20121221s59PB1283AF16rt23w10r13	9	AF16.84	AF16	23	12/21/12	13	38.83015102	123	402.13369	0.10830492	0.068309802	0.25995674	0.090526643	1
wormd20121221s59PB1283AF16rt23w10r14	9	AF16.84	AF16	23	12/21/12	14	39.89137551	293	361.466667	0.09892835	0.068309802	0.09898451	0.090526643	0
wormd20121221s59PB1283AF16rt23w10r15	9	AF16.84	AF16	23	12/21/12	15	40.9526	293	346.22	0.08977337	0.068309802	0.09052664	0.090526643	0
wormd20121221s59PB1283AF16rt23w11r00	10	AF16.85	AF16	23	12/21/12	0	25.03423265	293	373.063333	0.51813143	0.076486866	0.6184143	0.080085408	1
wormd20121221s59PB1283AF16rt23w11r01	10	AF16.85	AF16	23	12/21/12	1	26.09545714	172	305.039326	0.4630932	0.076486866	0.53491346	0.080085408	1
wormd20121221s59PB1283AF16rt23w11r03	10	AF16.85	AF16	23	12/21/12	3	28.21790612	137	322.262411	0.39164668	0.076486866	0.44880394	0.080085408	1
wormd20121221s59PB1283AF16rt23w11r13	10	AF16.85	AF16	23	12/21/12	13	38.83015102	293	318.503333	0.0965362	0.076486866	0.09935713	0.080085408	0
wormd20121221s59PB1283AF16rt23w11r14	10	AF16.85	AF16	23	12/21/12	14	39.89137551	293	303.583333	0.08985971	0.076486866	0.09120966	0.080085408	0
wormd20121221s59PB1283AF16rt23w11r15	10	AF16.85	AF16	23	12/21/12	15	40.9526	281	305.934028	0.07648687	0.076486866	0.08008541	0.080085408	0
wormd20121221s59PB1283AF16rt23w12r00	11	AF16.86	AF16	23	12/21/12	0	25.03423265	289	528.253378	0.22042524	0.061182834	0.45029395	0.063759201	1
wormd20121221s59PB1283AF16rt23w12r01	11	AF16.86	AF16	23	12/21/12	1	26.09545714	290	556.659933	0.20727352	0.061182834	0.43787588	0.063759201	1
wormd20121221s59PB1283AF16rt23w12r02	11	AF16.86	AF16	23	12/21/12	2	27.15668163	287	560.455782	0.31899541	0.061182834	0.49043063	0.063759201	1
wormd20121221s59PB1283AF16rt23w12r03	11	AF16.86	AF16	23	12/21/12	3	28.21790612	215	559.878924	0.1833935	0.061182834	0.42943778	0.063759201	1
wormd20121221s59PB1283AF16rt23w12r04	11	AF16.86	AF16	23	12/21/12	4	29.27913061	277	523.798587	0.27670841	0.061182834	0.47321837	0.063759201	1
wormd20121221s59PB1283AF16rt23w12r05	11	AF16.86	AF16	23	12/21/12	5	30.3403551	286	523.566553	0.24461426	0.061182834	0.46738386	0.063759201	1
wormd20121221s59PB1283AF16rt23w12r06	11	AF16.86	AF16	23	12/21/12	6	31.40157959	132	481.666667	0.06659152	0.061182834	0.15708909	0.063759201	1
wormd20121221s59PB1283AF16rt23w12r07	11	AF16.86	AF16	23	12/21/12	7	32.46280408	261	529.339552	0.12155129	0.061182834	0.29091824	0.063759201	1
wormd20121221s59PB1283AF16rt23w12r08	11	AF16.86	AF16	23	12/21/12	8	33.52402857	281	583.479167	0.07808506	0.061182834	0.17361524	0.063759201	1
wormd20121221s59PB1283AF16rt23w12r09	11	AF16.86	AF16	23	12/21/12	9	34.58525306	266	661.260073	0.07830123	0.061182834	0.14004068	0.063759201	1
wormd20121221s59PB1283AF16rt23w12r10	11	AF16.86	AF16	23	12/21/12	10	35.64647755	240	596.461538	0.07827788	0.061182834	0.14686032	0.063759201	1
wormd20121221s59PB1283AF16rt23w12r11	11	AF16.86	AF16	23	12/21/12	11	36.70770204	264	451.343173	0.07267063	0.061182834	0.12048143	0.063759201	0
wormd20121221s59PB1283AF16rt23w12r12	11	AF16.86	AF16	23	12/21/12	12	37.76892653	265	534.638376	0.07322066	0.061182834	0.11447082	0.063759201	0
wormd20121221s59PB1283AF16rt23w12r13	11	AF16.86	AF16	23	12/21/12	13	38.83015102	293	544.04	0.06972046	0.061182834	0.0708546	0.063759201	0
wormd20121221s59PB1283AF16rt23w12r14	11	AF16.86	AF16	23	12/21/12	14	39.89137551	293	537.54	0.06477648	0.061182834	0.06484311	0.063759201	0
wormd20121221s59PB1283AF16rt23w12r15	11	AF16.86	AF16	23	12/21/12	15	40.9526	293	481.84	0.06118283	0.061182834	0.0637592	0.063759201	0
wormd20121221s59PB1283AF16rt23w16r00	15	AF16.87	AF16	23	12/21/12	0	25.03423265	282	380.577855	0.48623836	0.089646504	0.5720666	0.092663039	1
wormd20121221s59PB1283AF16rt23w16r01	15	AF16.87	AF16	23	12/21/12	1	26.09545714	290	415.175084	0.38976467	0.089646504	0.64922054	0.092663039	1
wormd20121221s59PB1283AF16rt23w16r02	15	AF16.87	AF16	23	12/21/12	2	27.15668163	253	376.638462	0.43226762	0.089646504	0.69362688	0.092663039	1
wormd20121221s59PB1283AF16rt23w16r03	15	AF16.87	AF16	23	12/21/12	3	28.21790612	225	422.004405	0.31539957	0.089646504	0.63946904	0.092663039	1
wormd20121221s59PB1283AF16rt23w16r07	15	AF16.87	AF16	23	12/21/12	7	32.46280408	293	314.853333	0.0896465	0.089646504	0.09266304	0.092663039	0
wormd20121221s59PB1283AF16rt23w16r08	15	AF16.87	AF16	23	12/21/12	8	33.52402857	137	207.4	0.09168085	0.089646504	0.25782639	0.092663039	1
wormd20121221s59PB1283AF16rt23w16r09	15	AF16.87	AF16	23	12/21/12	9	34.58525306	290	300.969697	0.10161932	0.089646504	0.10798983	0.092663039	0
wormd20121221s59PB1283AF16rt23w16r10	15	AF16.87	AF16	23	12/21/12	10	35.64647755	293	317.613333	0.09732925	0.089646504	0.11360166	0.092663039	0
wormd20121221s59PB1283AF16rt23w16r11	15	AF16.87	AF16	23	12/21/12	11	36.70770204	293	321.426667	0.11494453	0.089646504	0.27939741	0.092663039	1
wormd20121221s59PB1283AF16rt23w16r12	15	AF16.87	AF16	23	12/21/12	12	37.76892653	293	311.493333	0.10120627	0.089646504	0.10016119	0.092663039	0
wormd20121221s59PB1283AF16rt23w16r13	15	AF16.87	AF16	23	12/21/12	13	38.83015102	293	328.25	0.10755236	0.089646504	0.11028768	0.092663039	0
wormd20121221s59PB1283AF16rt23w16r14	15	AF16.87	AF16	23	12/21/12	14	39.89137551	293	344.653333	0.09896518	0.089646504	0.09834089	0.092663039	0
wormd20121221s59PB1283AF16rt23w16r15	15	AF16.87	AF16	23	12/21/12	15	40.9526	293	323.01	0.10149177	0.089646504	0.10114856	0.092663039	0
wormd20121221s59PB1283AF16rt23w17r00	16	AF16.88	AF16	23	12/21/12	0	25.03423265	291	396.560403	0.41243664	0.070969032	0.73505499	0.07197095	1
wormd20121221s59PB1283AF16rt23w17r01	16	AF16.88	AF16	23	12/21/12	1	26.09545714	192	389.688442	0.50943055	0.070969032	0.66631563	0.07197095	1
wormd20121221s59PB1283AF16rt23w17r03	16	AF16.88	AF16	23	12/21/12	3	28.21790612	101	353.194444	0.63558175	0.070969032	0.73038017	0.07197095	1
wormd20121221s59PB1283AF16rt23w17r05	16	AF16.88	AF16	23	12/21/12	5	30.3403551	114	363.603306	0.56892153	0.070969032	0.65358092	0.07197095	1
wormd20121221s59PB1283AF16rt23w17r07	16	AF16.88	AF16	23	12/21/12	7	32.46280408	250	421.443137	0.55198838	0.070969032	0.75379142	0.07197095	1
wormd20121221s59PB1283AF16rt23w17r08	16	AF16.88	AF16	23	12/21/12	8	33.52402857	215	478.790909	0.43502838	0.070969032	0.74467332	0.07197095	1
wormd20121221s59PB1283AF16rt23w17r11	16	AF16.88	AF16	23	12/21/12	11	36.70770204	278	400.34386	0.07425537	0.070969032	0.07480161	0.07197095	0
wormd20121221s59PB1283AF16rt23w17r12	16	AF16.88	AF16	23	12/21/12	12	37.76892653	293	405.593333	0.07354474	0.070969032	0.07455456	0.07197095	0
wormd20121221s59PB1283AF16rt23w17r13	16	AF16.88	AF16	23	12/21/12	13	38.83015102	293	386.383333	0.07096903	0.070969032	0.07197095	0.07197095	0
wormd20121221s59PB1283AF16rt23w17r14	16	AF16.88	AF16	23	12/21/12	14	39.89137551	293	385.25	0.07959737	0.070969032	0.07983716	0.07197095	0
wormd20121221s59PB1283AF16rt23w18r00	17	AF16.89	AF16	23	12/21/12	0	25.03423265	196	257.349754	0.5000889	0.023821654	0.58188695	0.069411511	1
wormd20121221s59PB1283AF16rt23w18r01	17	AF16.89	AF16	23	12/21/12	1	26.09545714	202	343.866029	0.437673	0.023821654	0.51635189	0.069411511	1
wormd20121221s59PB1283AF16rt23w18r02	17	AF16.89	AF16	23	12/21/12	2	27.15668163	285	376.037671	0.51218626	0.023821654	0.65612771	0.069411511	1
wormd20121221s59PB1283AF16rt23w18r03	17	AF16.89	AF16	23	12/21/12	3	28.21790612	237	326.881148	0.53348872	0.023821654	0.71567509	0.069411511	1
wormd20121221s59PB1283AF16rt23w18r04	17	AF16.89	AF16	23	12/21/12	4	29.27913061	286	290.972696	0.58180791	0.023821654	0.74320288	0.069411511	1
wormd20121221s59PB1283AF16rt23w18r05	17	AF16.89	AF16	23	12/21/12	5	30.3403551	284	293.652921	0.51192944	0.023821654	0.74259756	0.069411511	1
wormd20121221s59PB1283AF16rt23w18r06	17	AF16.89	AF16	23	12/21/12	6	31.40157959	227	290.004274	0.33319152	0.023821654	0.52363283	0.069411511	1
wormd20121221s59PB1283AF16rt23w18r07	17	AF16.89	AF16	23	12/21/12	7	32.46280408	136	87.929078	0.02382165	0.023821654	0.06941151	0.069411511	0
wormd20121221s59PB1283AF16rt23w18r09	17	AF16.89	AF16	23	12/21/12	9	34.58525306	178	305.854054	0.06674265	0.023821654	0.13327309	0.069411511	0
wormd20121221s59PB1283AF16rt23w18r10	17	AF16.89	AF16	23	12/21/12	10	35.64647755	293	300.623333	0.1012234	0.023821654	0.17504349	0.069411511	1
wormd20121221s59PB1283AF16rt23w18r11	17	AF16.89	AF16	23	12/21/12	11	36.70770204	293	303.513333	0.09693744	0.023821654	0.10011979	0.069411511	0
wormd20121221s59PB1283AF16rt23w18r12	17	AF16.89	AF16	23	12/21/12	12	37.76892653	293	308.616667	0.10605881	0.023821654	0.12144308	0.069411511	0
wormd20121221s59PB1283AF16rt23w18r13	17	AF16.89	AF16	23	12/21/12	13	38.83015102	293	292.786667	0.11864722	0.023821654	0.12064248	0.069411511	0
wormd20121221s59PB1283AF16rt23w18r14	17	AF16.89	AF16	23	12/21/12	14	39.89137551	293	287.256667	0.10170248	0.023821654	0.09880176	0.069411511	0
wormd20121221s59PB1283AF16rt23w18r15	17	AF16.89	AF16	23	12/21/12	15	40.9526	293	287.103333	0.10607487	0.023821654	0.10776691	0.069411511	0
wormd20121118s61HK104PB1244rt23w01r00	0	HK104.90	HK104	23	11/18/12	0	25.03423265	287	299.29932	0.71000521	0.087943938	0.77542157	0.088229584	1
wormd20121118s61HK104PB1244rt23w01r01	0	HK104.90	HK104	23	11/18/12	1	26.09545714	271	293.217391	0.75392077	0.087943938	0.83834341	0.088229584	1
wormd20121118s61HK104PB1244rt23w01r02	0	HK104.90	HK104	23	11/18/12	2	27.15668163	209	288.441315	0.76518441	0.087943938	0.86253106	0.088229584	1
wormd20121118s61HK104PB1244rt23w01r03	0	HK104.90	HK104	23	11/18/12	3	28.21790612	227	306.512931	0.69164685	0.087943938	0.84111868	0.088229584	1
wormd20121118s61HK104PB1244rt23w01r04	0	HK104.90	HK104	23	11/18/12	4	29.27913061	179	287.102151	0.67569708	0.087943938	0.80052882	0.088229584	1
wormd20121118s61HK104PB1244rt23w01r06	0	HK104.90	HK104	23	11/18/12	6	31.40157959	160	289.227545	0.63904131	0.087943938	0.79359138	0.088229584	1
wormd20121118s61HK104PB1244rt23w01r07	0	HK104.90	HK104	23	11/18/12	7	32.46280408	112	292.708333	0.54190045	0.087943938	0.72112859	0.088229584	1
wormd20121118s61HK104PB1244rt23w01r08	0	HK104.90	HK104	23	11/18/12	8	33.52402857	148	267.767742	0.71804126	0.087943938	0.7798992	0.088229584	1
wormd20121118s61HK104PB1244rt23w01r09	0	HK104.90	HK104	23	11/18/12	9	34.58525306	293	334.856667	0.08794394	0.087943938	0.08822958	0.088229584	0
wormd20121118s61HK104PB1244rt23w01r10	0	HK104.90	HK104	23	11/18/12	10	35.64647755	293	260.026667	0.12066355	0.087943938	0.33152449	0.088229584	1
wormd20121118s61HK104PB1244rt23w01r11	0	HK104.90	HK104	23	11/18/12	11	36.70770204	293	247.623333	0.10179521	0.087943938	0.10354161	0.088229584	0
wormd20121118s61HK104PB1244rt23w01r12	0	HK104.90	HK104	23	11/18/12	12	37.76892653	293	234.43	0.09232768	0.087943938	0.09416323	0.088229584	0
wormd20121118s61HK104PB1244rt23w01r13	0	HK104.90	HK104	23	11/18/12	13	38.83015102	293	231.87	0.09338535	0.087943938	0.09449719	0.088229584	0
wormd20121118s61HK104PB1244rt23w01r14	0	HK104.90	HK104	23	11/18/12	14	39.89137551	293	236.876667	0.09891179	0.087943938	0.10010299	0.088229584	0
wormd20121118s61HK104PB1244rt23w01r15	0	HK104.90	HK104	23	11/18/12	15	40.9526	293	250.27	0.09645334	0.087943938	0.0970779	0.088229584	0
wormd20121118s61HK104PB1244rt23w02r00	1	HK104.91	HK104	23	11/18/12	0	25.03423265	275	316.185053	0.69593949	0.099128881	0.74104782	0.10290965	1
wormd20121118s61HK104PB1244rt23w02r01	1	HK104.91	HK104	23	11/18/12	1	26.09545714	238	322.861224	0.70765271	0.099128881	0.78224988	0.10290965	1
wormd20121118s61HK104PB1244rt23w02r02	1	HK104.91	HK104	23	11/18/12	2	27.15668163	159	308.345679	0.67831983	0.099128881	0.76528697	0.10290965	1
wormd20121118s61HK104PB1244rt23w02r03	1	HK104.91	HK104	23	11/18/12	3	28.21790612	186	321.834197	0.69809174	0.099128881	0.78982652	0.10290965	1
wormd20121118s61HK104PB1244rt23w02r04	1	HK104.91	HK104	23	11/18/12	4	29.27913061	222	307.017467	0.6466485	0.099128881	0.76679054	0.10290965	1
wormd20121118s61HK104PB1244rt23w02r05	1	HK104.91	HK104	23	11/18/12	5	30.3403551	243	344.391304	0.65955819	0.099128881	0.76094856	0.10290965	1
wormd20121118s61HK104PB1244rt23w02r06	1	HK104.91	HK104	23	11/18/12	6	31.40157959	267	309.254355	0.66661984	0.099128881	0.75610972	0.10290965	1
wormd20121118s61HK104PB1244rt23w02r07	1	HK104.91	HK104	23	11/18/12	7	32.46280408	259	313.139098	0.61927416	0.099128881	0.74209244	0.10290965	1
wormd20121118s61HK104PB1244rt23w02r08	1	HK104.91	HK104	23	11/18/12	8	33.52402857	230	292.285106	0.6150565	0.099128881	0.70790887	0.10290965	1
wormd20121118s61HK104PB1244rt23w02r09	1	HK104.91	HK104	23	11/18/12	9	34.58525306	293	327.646667	0.22354283	0.099128881	0.47453536	0.10290965	1
wormd20121118s61HK104PB1244rt23w02r10	1	HK104.91	HK104	23	11/18/12	10	35.64647755	293	335.296667	0.11694604	0.099128881	0.12307882	0.10290965	0
wormd20121118s61HK104PB1244rt23w02r11	1	HK104.91	HK104	23	11/18/12	11	36.70770204	293	299.486667	0.09912888	0.099128881	0.10290965	0.10290965	0
wormd20121118s61HK104PB1244rt23w02r12	1	HK104.91	HK104	23	11/18/12	12	37.76892653	293	302.143333	0.10767286	0.099128881	0.1147816	0.10290965	0
wormd20121118s61HK104PB1244rt23w02r13	1	HK104.91	HK104	23	11/18/12	13	38.83015102	293	303.553333	0.1115074	0.099128881	0.11214491	0.10290965	0
wormd20121118s61HK104PB1244rt23w02r14	1	HK104.91	HK104	23	11/18/12	14	39.89137551	293	294.236667	0.12206099	0.099128881	0.12403065	0.10290965	0
wormd20121118s61HK104PB1244rt23w02r15	1	HK104.91	HK104	23	11/18/12	15	40.9526	293	293.013333	0.11237421	0.099128881	0.11360378	0.10290965	0
wormd20121118s61HK104PB1244rt23w03r00	2	HK104.92	HK104	23	11/18/12	0	25.03423265	290	360.521886	0.62343207	0.109050665	0.73301033	0.110058405	1
wormd20121118s61HK104PB1244rt23w03r01	2	HK104.92	HK104	23	11/18/12	1	26.09545714	261	369.541045	0.63557993	0.109050665	0.75788259	0.110058405	1
wormd20121118s61HK104PB1244rt23w03r02	2	HK104.92	HK104	23	11/18/12	2	27.15668163	156	328.331288	0.57908683	0.109050665	0.68486328	0.110058405	1
wormd20121118s61HK104PB1244rt23w03r03	2	HK104.92	HK104	23	11/18/12	3	28.21790612	275	373.670213	0.59560093	0.109050665	0.7344563	0.110058405	1
wormd20121118s61HK104PB1244rt23w03r05	2	HK104.92	HK104	23	11/18/12	5	30.3403551	171	361.754011	0.68580512	0.109050665	0.78375953	0.110058405	1
wormd20121118s61HK104PB1244rt23w03r06	2	HK104.92	HK104	23	11/18/12	6	31.40157959	235	346.683333	0.46634743	0.109050665	0.72912847	0.110058405	1
wormd20121118s61HK104PB1244rt23w03r07	2	HK104.92	HK104	23	11/18/12	7	32.46280408	199	326.587065	0.59725431	0.109050665	0.67677228	0.110058405	1
wormd20121118s61HK104PB1244rt23w03r08	2	HK104.92	HK104	23	11/18/12	8	33.52402857	273	323.514286	0.6042264	0.109050665	0.70682295	0.110058405	1
wormd20121118s61HK104PB1244rt23w03r09	2	HK104.92	HK104	23	11/18/12	9	34.58525306	264	327.955056	0.31421801	0.109050665	0.6762067	0.110058405	1
wormd20121118s61HK104PB1244rt23w03r10	2	HK104.92	HK104	23	11/18/12	10	35.64647755	293	276.006667	0.11839018	0.109050665	0.12318329	0.110058405	0
wormd20121118s61HK104PB1244rt23w03r11	2	HK104.92	HK104	23	11/18/12	11	36.70770204	292	274.521739	0.11871361	0.109050665	0.12142386	0.110058405	0
wormd20121118s61HK104PB1244rt23w03r12	2	HK104.92	HK104	23	11/18/12	12	37.76892653	290	294.461279	0.12902983	0.109050665	0.1309108	0.110058405	0
wormd20121118s61HK104PB1244rt23w03r13	2	HK104.92	HK104	23	11/18/12	13	38.83015102	293	309.816667	0.11666196	0.109050665	0.11636673	0.110058405	0
wormd20121118s61HK104PB1244rt23w03r14	2	HK104.92	HK104	23	11/18/12	14	39.89137551	293	292.503333	0.12034561	0.109050665	0.12060625	0.110058405	0
wormd20121118s61HK104PB1244rt23w03r15	2	HK104.92	HK104	23	11/18/12	15	40.9526	293	296.17	0.10905066	0.109050665	0.1100584	0.110058405	0
wormd20121118s61HK104PB1244rt23w07r00	6	HK104.93	HK104	23	11/18/12	0	25.03423265	271	272.81295	0.70423427	0.087974047	0.76864636	0.089702917	1
wormd20121118s61HK104PB1244rt23w07r01	6	HK104.93	HK104	23	11/18/12	1	26.09545714	211	281.67757	0.6509513	0.087974047	0.77953988	0.089702917	1
wormd20121118s61HK104PB1244rt23w07r02	6	HK104.93	HK104	23	11/18/12	2	27.15668163	255	276.629771	0.69107953	0.087974047	0.8191889	0.089702917	1
wormd20121118s61HK104PB1244rt23w07r04	6	HK104.93	HK104	23	11/18/12	4	29.27913061	151	273.512658	0.69458096	0.087974047	0.82030041	0.089702917	1
wormd20121118s61HK104PB1244rt23w07r05	6	HK104.93	HK104	23	11/18/12	5	30.3403551	141	273.069182	0.66251805	0.087974047	0.77097393	0.089702917	1
wormd20121118s61HK104PB1244rt23w07r06	6	HK104.93	HK104	23	11/18/12	6	31.40157959	249	255.228782	0.60756821	0.087974047	0.71933332	0.089702917	1
wormd20121118s61HK104PB1244rt23w07r07	6	HK104.93	HK104	23	11/18/12	7	32.46280408	199	251.625532	0.72554517	0.087974047	0.74820932	0.089702917	1
wormd20121118s61HK104PB1244rt23w07r08	6	HK104.93	HK104	23	11/18/12	8	33.52402857	206	245.179487	0.67077688	0.087974047	0.63554743	0.089702917	1
wormd20121118s61HK104PB1244rt23w07r09	6	HK104.93	HK104	23	11/18/12	9	34.58525306	290	250.828283	0.57359351	0.087974047	0.74503186	0.089702917	1
wormd20121118s61HK104PB1244rt23w07r10	6	HK104.93	HK104	23	11/18/12	10	35.64647755	293	229.126667	0.1309208	0.087974047	0.33015924	0.089702917	1
wormd20121118s61HK104PB1244rt23w07r11	6	HK104.93	HK104	23	11/18/12	11	36.70770204	293	250.08	0.10484879	0.087974047	0.16742113	0.089702917	1
wormd20121118s61HK104PB1244rt23w07r12	6	HK104.93	HK104	23	11/18/12	12	37.76892653	293	250.9	0.09976495	0.087974047	0.10590663	0.089702917	0
wormd20121118s61HK104PB1244rt23w07r13	6	HK104.93	HK104	23	11/18/12	13	38.83015102	293	241.963333	0.10078856	0.087974047	0.1007648	0.089702917	0
wormd20121118s61HK104PB1244rt23w07r14	6	HK104.93	HK104	23	11/18/12	14	39.89137551	293	242.373333	0.0991714	0.087974047	0.09946996	0.089702917	0
wormd20121118s61HK104PB1244rt23w07r15	6	HK104.93	HK104	23	11/18/12	15	40.9526	293	233.49	0.08797405	0.087974047	0.08970292	0.089702917	0
wormd20121118s61HK104PB1244rt23w08r00	7	HK104.94	HK104	23	11/18/12	0	25.03423265	242	309.546185	0.68007379	0.087003085	0.73232183	0.088083405	1
wormd20121118s61HK104PB1244rt23w08r01	7	HK104.94	HK104	23	11/18/12	1	26.09545714	131	313.609023	0.66642479	0.087003085	0.77315116	0.088083405	1
wormd20121118s61HK104PB1244rt23w08r02	7	HK104.94	HK104	23	11/18/12	2	27.15668163	287	331.608844	0.64814936	0.087003085	0.77393311	0.088083405	1
wormd20121118s61HK104PB1244rt23w08r03	7	HK104.94	HK104	23	11/18/12	3	28.21790612	135	343.35461	0.54465011	0.087003085	0.63134757	0.088083405	1
wormd20121118s61HK104PB1244rt23w08r04	7	HK104.94	HK104	23	11/18/12	4	29.27913061	246	317.388	0.58235453	0.087003085	0.74753541	0.088083405	1
wormd20121118s61HK104PB1244rt23w08r05	7	HK104.94	HK104	23	11/18/12	5	30.3403551	241	334.448819	0.5206289	0.087003085	0.74620464	0.088083405	1
wormd20121118s61HK104PB1244rt23w08r06	7	HK104.94	HK104	23	11/18/12	6	31.40157959	187	322.984043	0.64666363	0.087003085	0.73542903	0.088083405	1
wormd20121118s61HK104PB1244rt23w08r07	7	HK104.94	HK104	23	11/18/12	7	32.46280408	172	303.534091	0.69361833	0.087003085	0.80860514	0.088083405	1
wormd20121118s61HK104PB1244rt23w08r08	7	HK104.94	HK104	23	11/18/12	8	33.52402857	151	287.452229	0.52358332	0.087003085	0.62435964	0.088083405	1
wormd20121118s61HK104PB1244rt23w08r09	7	HK104.94	HK104	23	11/18/12	9	34.58525306	263	295.781481	0.5523544	0.087003085	0.66017311	0.088083405	1
wormd20121118s61HK104PB1244rt23w08r10	7	HK104.94	HK104	23	11/18/12	10	35.64647755	293	301.966667	0.09109055	0.087003085	0.09363628	0.088083405	0
wormd20121118s61HK104PB1244rt23w08r11	7	HK104.94	HK104	23	11/18/12	11	36.70770204	293	280.306667	0.08700309	0.087003085	0.08857019	0.088083405	0
wormd20121118s61HK104PB1244rt23w08r12	7	HK104.94	HK104	23	11/18/12	12	37.76892653	293	282.59	0.10367962	0.087003085	0.10793887	0.088083405	0
wormd20121118s61HK104PB1244rt23w08r13	7	HK104.94	HK104	23	11/18/12	13	38.83015102	293	309.433333	0.09334046	0.087003085	0.09431539	0.088083405	0
wormd20121118s61HK104PB1244rt23w08r14	7	HK104.94	HK104	23	11/18/12	14	39.89137551	293	302.046667	0.09914343	0.087003085	0.10132358	0.088083405	0
wormd20121118s61HK104PB1244rt23w08r15	7	HK104.94	HK104	23	11/18/12	15	40.9526	293	313.71	0.08736956	0.087003085	0.08808341	0.088083405	0
wormd20121118s61HK104PB1244rt23w09r00	8	HK104.95	HK104	23	11/18/12	0	25.03423265	293	346.103333	0.62483861	0.089002911	0.65840222	0.08841115	1
wormd20121118s61HK104PB1244rt23w09r01	8	HK104.95	HK104	23	11/18/12	1	26.09545714	265	334.136029	0.64475761	0.089002911	0.71862874	0.08841115	1
wormd20121118s61HK104PB1244rt23w09r02	8	HK104.95	HK104	23	11/18/12	2	27.15668163	289	326.554054	0.66694805	0.089002911	0.77119701	0.08841115	1
wormd20121118s61HK104PB1244rt23w09r03	8	HK104.95	HK104	23	11/18/12	3	28.21790612	203	325.200935	0.68366293	0.089002911	0.79563339	0.08841115	1
wormd20121118s61HK104PB1244rt23w09r04	8	HK104.95	HK104	23	11/18/12	4	29.27913061	180	325.804124	0.72304244	0.089002911	0.81544127	0.08841115	1
wormd20121118s61HK104PB1244rt23w09r05	8	HK104.95	HK104	23	11/18/12	5	30.3403551	237	307.954918	0.48500562	0.089002911	0.74569381	0.08841115	1
wormd20121118s61HK104PB1244rt23w09r06	8	HK104.95	HK104	23	11/18/12	6	31.40157959	258	319.30566	0.67837405	0.089002911	0.80668883	0.08841115	1
wormd20121118s61HK104PB1244rt23w09r07	8	HK104.95	HK104	23	11/18/12	7	32.46280408	150	306.376623	0.70037466	0.089002911	0.79677545	0.08841115	1
wormd20121118s61HK104PB1244rt23w09r08	8	HK104.95	HK104	23	11/18/12	8	33.52402857	144	276.143791	0.69536447	0.089002911	0.76035976	0.08841115	1
wormd20121118s61HK104PB1244rt23w09r09	8	HK104.95	HK104	23	11/18/12	9	34.58525306	154	278.034682	0.40279594	0.089002911	0.59346596	0.08841115	1
wormd20121118s61HK104PB1244rt23w09r10	8	HK104.95	HK104	23	11/18/12	10	35.64647755	293	294.996667	0.09229764	0.089002911	0.09612919	0.08841115	0
wormd20121118s61HK104PB1244rt23w09r11	8	HK104.95	HK104	23	11/18/12	11	36.70770204	293	312.98	0.09077069	0.089002911	0.09257527	0.08841115	0
wormd20121118s61HK104PB1244rt23w09r12	8	HK104.95	HK104	23	11/18/12	12	37.76892653	293	310.39	0.09028633	0.089002911	0.09160583	0.08841115	0
wormd20121118s61HK104PB1244rt23w09r13	8	HK104.95	HK104	23	11/18/12	13	38.83015102	293	306.176667	0.09409071	0.089002911	0.09415299	0.08841115	0
wormd20121118s61HK104PB1244rt23w09r14	8	HK104.95	HK104	23	11/18/12	14	39.89137551	293	306.506667	0.08900291	0.089002911	0.08841115	0.08841115	0
wormd20121118s61HK104PB1244rt23w09r15	8	HK104.95	HK104	23	11/18/12	15	40.9526	293	312.746667	0.09164182	0.089002911	0.09171356	0.08841115	0
wormd20121118s61HK104PB1244rt23w13r00	12	HK104.96	HK104	23	11/18/12	0	25.03423265	259	323.147727	0.62514682	0.104527617	0.74966588	0.107178681	1
wormd20121118s61HK104PB1244rt23w13r01	12	HK104.96	HK104	23	11/18/12	1	26.09545714	256	346.229885	0.6472692	0.104527617	0.76908629	0.107178681	1
wormd20121118s61HK104PB1244rt23w13r02	12	HK104.96	HK104	23	11/18/12	2	27.15668163	171	349.286517	0.6128318	0.104527617	0.79298098	0.107178681	1
wormd20121118s61HK104PB1244rt23w13r03	12	HK104.96	HK104	23	11/18/12	3	28.21790612	206	323.177033	0.63708695	0.104527617	0.8007709	0.107178681	1
wormd20121118s61HK104PB1244rt23w13r04	12	HK104.96	HK104	23	11/18/12	4	29.27913061	200	298.217391	0.70932252	0.104527617	0.8279208	0.107178681	1
wormd20121118s61HK104PB1244rt23w13r05	12	HK104.96	HK104	23	11/18/12	5	30.3403551	265	334.720588	0.63118313	0.104527617	0.7973265	0.107178681	1
wormd20121118s61HK104PB1244rt23w13r06	12	HK104.96	HK104	23	11/18/12	6	31.40157959	199	310.524272	0.65277692	0.104527617	0.8053321	0.107178681	1
wormd20121118s61HK104PB1244rt23w13r07	12	HK104.96	HK104	23	11/18/12	7	32.46280408	229	320.427966	0.64580686	0.104527617	0.78352165	0.107178681	1
wormd20121118s61HK104PB1244rt23w13r08	12	HK104.96	HK104	23	11/18/12	8	33.52402857	257	301.866412	0.61150826	0.104527617	0.76917039	0.107178681	1
wormd20121118s61HK104PB1244rt23w13r09	12	HK104.96	HK104	23	11/18/12	9	34.58525306	293	274.386667	0.10846781	0.104527617	0.10940472	0.107178681	0
wormd20121118s61HK104PB1244rt23w13r10	12	HK104.96	HK104	23	11/18/12	10	35.64647755	293	298.586667	0.15227804	0.104527617	0.29543983	0.107178681	1
wormd20121118s61HK104PB1244rt23w13r11	12	HK104.96	HK104	23	11/18/12	11	36.70770204	293	309.073333	0.11722937	0.104527617	0.13323303	0.107178681	0
wormd20121118s61HK104PB1244rt23w13r12	12	HK104.96	HK104	23	11/18/12	12	37.76892653	293	324.343333	0.10688387	0.104527617	0.10717868	0.107178681	0
wormd20121118s61HK104PB1244rt23w13r13	12	HK104.96	HK104	23	11/18/12	13	38.83015102	242	331.630522	0.10452762	0.104527617	0.10765458	0.107178681	0
wormd20121118s61HK104PB1244rt23w14r00	13	HK104.97	HK104	23	11/18/12	0	25.03423265	289	405.689189	0.58986071	0.077622506	0.70200856	0.079110874	1
wormd20121118s61HK104PB1244rt23w14r01	13	HK104.97	HK104	23	11/18/12	1	26.09545714	219	388.737778	0.65088147	0.077622506	0.68201329	0.079110874	1
wormd20121118s61HK104PB1244rt23w14r02	13	HK104.97	HK104	23	11/18/12	2	27.15668163	293	421.813333	0.59448983	0.077622506	0.67747478	0.079110874	1
wormd20121118s61HK104PB1244rt23w14r03	13	HK104.97	HK104	23	11/18/12	3	28.21790612	117	391.398649	0.6624843	0.077622506	0.75896169	0.079110874	1
wormd20121118s61HK104PB1244rt23w14r04	13	HK104.97	HK104	23	11/18/12	4	29.27913061	138	370.072917	0.69900641	0.077622506	0.77223597	0.079110874	1
wormd20121118s61HK104PB1244rt23w14r05	13	HK104.97	HK104	23	11/18/12	5	30.3403551	121	351.694656	0.60892217	0.077622506	0.70737818	0.079110874	1
wormd20121118s61HK104PB1244rt23w14r06	13	HK104.97	HK104	23	11/18/12	6	31.40157959	169	373.212264	0.62291764	0.077622506	0.65522596	0.079110874	1
wormd20121118s61HK104PB1244rt23w14r07	13	HK104.97	HK104	23	11/18/12	7	32.46280408	247	386.418773	0.53014406	0.077622506	0.69621725	0.079110874	1
wormd20121118s61HK104PB1244rt23w14r09	13	HK104.97	HK104	23	11/18/12	9	34.58525306	293	332.84	0.09690842	0.077622506	0.0985419	0.079110874	0
wormd20121118s61HK104PB1244rt23w14r10	13	HK104.97	HK104	23	11/18/12	10	35.64647755	293	337.453333	0.09742816	0.077622506	0.10035599	0.079110874	0
wormd20121118s61HK104PB1244rt23w14r11	13	HK104.97	HK104	23	11/18/12	11	36.70770204	293	325.6	0.08996071	0.077622506	0.09144326	0.079110874	0
wormd20121118s61HK104PB1244rt23w14r12	13	HK104.97	HK104	23	11/18/12	12	37.76892653	293	320.893333	0.08783626	0.077622506	0.08910955	0.079110874	0
wormd20121118s61HK104PB1244rt23w14r13	13	HK104.97	HK104	23	11/18/12	13	38.83015102	293	322.986667	0.08756328	0.077622506	0.08892068	0.079110874	0
wormd20121118s61HK104PB1244rt23w14r14	13	HK104.97	HK104	23	11/18/12	14	39.89137551	293	326.566667	0.08773262	0.077622506	0.08917082	0.079110874	0
wormd20121118s61HK104PB1244rt23w14r15	13	HK104.97	HK104	23	11/18/12	15	40.9526	293	336.446667	0.07762251	0.077622506	0.07911087	0.079110874	0
wormd20121118s61HK104PB1244rt23w15r00	14	HK104.98	HK104	23	11/18/12	0	25.03423265	287	324.197279	0.55736228	0.002528903	0.69010756	0.002471954	1
wormd20121118s61HK104PB1244rt23w15r01	14	HK104.98	HK104	23	11/18/12	1	26.09545714	253	331.523077	0.54322948	0.002528903	0.65467908	0.002471954	1
wormd20121118s61HK104PB1244rt23w15r02	14	HK104.98	HK104	23	11/18/12	2	27.15668163	265	324.437063	0.57033363	0.002528903	0.66652134	0.002471954	1
wormd20121118s61HK104PB1244rt23w15r03	14	HK104.98	HK104	23	11/18/12	3	28.21790612	251	325.98062	0.58070042	0.002528903	0.73075761	0.002471954	1
wormd20121118s61HK104PB1244rt23w15r04	14	HK104.98	HK104	23	11/18/12	4	29.27913061	240	344.855469	0.56345337	0.002528903	0.71545453	0.002471954	1
wormd20121118s61HK104PB1244rt23w15r05	14	HK104.98	HK104	23	11/18/12	5	30.3403551	225	311.957806	0.53426886	0.002528903	0.68352023	0.002471954	1
wormd20121118s61HK104PB1244rt23w15r06	14	HK104.98	HK104	23	11/18/12	6	31.40157959	225	283.081897	0.62987942	0.002528903	0.71379646	0.002471954	1
wormd20121118s61HK104PB1244rt23w15r08	14	HK104.98	HK104	23	11/18/12	8	33.52402857	102	273.471698	0.54902504	0.002528903	0.61359174	0.002471954	1
wormd20121118s61HK104PB1244rt23w15r15	14	HK104.98	HK104	23	11/18/12	15	40.9526	280	48.1219512	0.0025289	0.002528903	0.00247195	0.002471954	0
wormd20121119s72PB1138HK104rt23w04r00	3	HK104.99	HK104	23	11/19/12	0	25.03423265	292	446.317726	0.620612	0.053886136	0.67475247	0.054660607	1
wormd20121119s72PB1138HK104rt23w04r01	3	HK104.99	HK104	23	11/19/12	1	26.09545714	271	451.784173	0.62659667	0.053886136	0.70473427	0.054660607	1
wormd20121119s72PB1138HK104rt23w04r02	3	HK104.99	HK104	23	11/19/12	2	27.15668163	227	441.611111	0.5830946	0.053886136	0.72082613	0.054660607	1
wormd20121119s72PB1138HK104rt23w04r03	3	HK104.99	HK104	23	11/19/12	3	28.21790612	159	406.024096	0.61631589	0.053886136	0.70857662	0.054660607	1
wormd20121119s72PB1138HK104rt23w04r04	3	HK104.99	HK104	23	11/19/12	4	29.27913061	180	430.84492	0.62550641	0.053886136	0.72545382	0.054660607	1
wormd20121119s72PB1138HK104rt23w04r05	3	HK104.99	HK104	23	11/19/12	5	30.3403551	134	398.921986	0.60779635	0.053886136	0.68563816	0.054660607	1
wormd20121119s72PB1138HK104rt23w04r06	3	HK104.99	HK104	23	11/19/12	6	31.40157959	292	430.525084	0.49516813	0.053886136	0.67838234	0.054660607	1
wormd20121119s72PB1138HK104rt23w04r07	3	HK104.99	HK104	23	11/19/12	7	32.46280408	293	444.316667	0.36427617	0.053886136	0.56409628	0.054660607	1
wormd20121119s72PB1138HK104rt23w04r08	3	HK104.99	HK104	23	11/19/12	8	33.52402857	269	425.421986	0.46940553	0.053886136	0.6590902	0.054660607	1
wormd20121119s72PB1138HK104rt23w04r09	3	HK104.99	HK104	23	11/19/12	9	34.58525306	293	445.976667	0.06033661	0.053886136	0.06053718	0.054660607	0
wormd20121119s72PB1138HK104rt23w04r10	3	HK104.99	HK104	23	11/19/12	10	35.64647755	293	489.853333	0.06448412	0.053886136	0.15569024	0.054660607	1
wormd20121119s72PB1138HK104rt23w04r11	3	HK104.99	HK104	23	11/19/12	11	36.70770204	293	493.676667	0.05388614	0.053886136	0.05466061	0.054660607	0
wormd20121119s72PB1138HK104rt23w04r12	3	HK104.99	HK104	23	11/19/12	12	37.76892653	293	489.776667	0.05752167	0.053886136	0.0573535	0.054660607	0
wormd20121119s72PB1138HK104rt23w04r13	3	HK104.99	HK104	23	11/19/12	13	38.83015102	293	454.92	0.05846574	0.053886136	0.05886212	0.054660607	0
wormd20121119s72PB1138HK104rt23w04r14	3	HK104.99	HK104	23	11/19/12	14	39.89137551	293	452.34	0.05699687	0.053886136	0.05828304	0.054660607	0
wormd20121119s72PB1138HK104rt23w04r15	3	HK104.99	HK104	23	11/19/12	15	40.9526	293	441.01	0.05728444	0.053886136	0.05757408	0.054660607	0
wormd20121119s72PB1138HK104rt23w05r00	4	HK104.100	HK104	23	11/19/12	0	25.03423265	287	341.156463	0.70871323	0.060031978	0.7996396	0.061418537	1
wormd20121119s72PB1138HK104rt23w05r01	4	HK104.100	HK104	23	11/19/12	1	26.09545714	202	364.868932	0.63939417	0.060031978	0.79810599	0.061418537	1
wormd20121119s72PB1138HK104rt23w05r02	4	HK104.100	HK104	23	11/19/12	2	27.15668163	247	364.107143	0.63012142	0.060031978	0.74930749	0.061418537	1
wormd20121119s72PB1138HK104rt23w05r03	4	HK104.100	HK104	23	11/19/12	3	28.21790612	163	340.635294	0.6998777	0.060031978	0.84770182	0.061418537	1
wormd20121119s72PB1138HK104rt23w05r04	4	HK104.100	HK104	23	11/19/12	4	29.27913061	155	286.944444	0.66030648	0.060031978	0.74361892	0.061418537	1
wormd20121119s72PB1138HK104rt23w05r06	4	HK104.100	HK104	23	11/19/12	6	31.40157959	145	308.27027	0.65414689	0.060031978	0.80283152	0.061418537	1
wormd20121119s72PB1138HK104rt23w05r07	4	HK104.100	HK104	23	11/19/12	7	32.46280408	176	352.759358	0.63417692	0.060031978	0.75324562	0.061418537	1
wormd20121119s72PB1138HK104rt23w05r08	4	HK104.100	HK104	23	11/19/12	8	33.52402857	265	324.52809	0.42854671	0.060031978	0.66276827	0.061418537	1
wormd20121119s72PB1138HK104rt23w05r09	4	HK104.100	HK104	23	11/19/12	9	34.58525306	293	408.15	0.06102303	0.060031978	0.06319959	0.061418537	0
wormd20121119s72PB1138HK104rt23w05r10	4	HK104.100	HK104	23	11/19/12	10	35.64647755	293	347.76	0.07009489	0.060031978	0.08354151	0.061418537	0
wormd20121119s72PB1138HK104rt23w05r11	4	HK104.100	HK104	23	11/19/12	11	36.70770204	293	326.52	0.06988227	0.060031978	0.07168113	0.061418537	0
wormd20121119s72PB1138HK104rt23w05r12	4	HK104.100	HK104	23	11/19/12	12	37.76892653	293	312.56	0.06003198	0.060031978	0.06141854	0.061418537	0
wormd20121119s72PB1138HK104rt23w05r13	4	HK104.100	HK104	23	11/19/12	13	38.83015102	293	306.993333	0.0641153	0.060031978	0.06601041	0.061418537	0
wormd20121119s72PB1138HK104rt23w05r14	4	HK104.100	HK104	23	11/19/12	14	39.89137551	293	307.263333	0.0646142	0.060031978	0.06605065	0.061418537	0
wormd20121119s72PB1138HK104rt23w05r15	4	HK104.100	HK104	23	11/19/12	15	40.9526	293	314.77	0.07403745	0.060031978	0.0768479	0.061418537	0
wormd20121119s72PB1138HK104rt23w06r00	5	HK104.101	HK104	23	11/19/12	0	25.03423265	291	421.728188	0.68651739	0.043147461	0.75616562	0.04468941	1
wormd20121119s72PB1138HK104rt23w06r01	5	HK104.101	HK104	23	11/19/12	1	26.09545714	287	443.040816	0.66020579	0.043147461	0.77264277	0.04468941	1
wormd20121119s72PB1138HK104rt23w06r02	5	HK104.101	HK104	23	11/19/12	2	27.15668163	271	459.039568	0.6779923	0.043147461	0.80647652	0.04468941	1
wormd20121119s72PB1138HK104rt23w06r03	5	HK104.101	HK104	23	11/19/12	3	28.21790612	269	421.253623	0.71131671	0.043147461	0.82554544	0.04468941	1
wormd20121119s72PB1138HK104rt23w06r04	5	HK104.101	HK104	23	11/19/12	4	29.27913061	241	389.355102	0.70232426	0.043147461	0.85343603	0.04468941	1
wormd20121119s72PB1138HK104rt23w06r05	5	HK104.101	HK104	23	11/19/12	5	30.3403551	227	428.086207	0.71736544	0.043147461	0.84374605	0.04468941	1
wormd20121119s72PB1138HK104rt23w06r06	5	HK104.101	HK104	23	11/19/12	6	31.40157959	116	415.99187	0.6265894	0.043147461	0.79054434	0.04468941	1
wormd20121119s72PB1138HK104rt23w06r07	5	HK104.101	HK104	23	11/19/12	7	32.46280408	276	414.416961	0.67501852	0.043147461	0.77513495	0.04468941	1
wormd20121119s72PB1138HK104rt23w06r08	5	HK104.101	HK104	23	11/19/12	8	33.52402857	280	445.264808	0.56184672	0.043147461	0.65165257	0.04468941	1
wormd20121119s72PB1138HK104rt23w06r09	5	HK104.101	HK104	23	11/19/12	9	34.58525306	293	400.51	0.04866922	0.043147461	0.05136785	0.04468941	0
wormd20121119s72PB1138HK104rt23w06r10	5	HK104.101	HK104	23	11/19/12	10	35.64647755	293	402.333333	0.0547516	0.043147461	0.05814771	0.04468941	0
wormd20121119s72PB1138HK104rt23w06r11	5	HK104.101	HK104	23	11/19/12	11	36.70770204	293	399.896667	0.05413304	0.043147461	0.05720622	0.04468941	0
wormd20121119s72PB1138HK104rt23w06r12	5	HK104.101	HK104	23	11/19/12	12	37.76892653	293	398.313333	0.04314746	0.043147461	0.04468941	0.04468941	0
wormd20121119s72PB1138HK104rt23w06r13	5	HK104.101	HK104	23	11/19/12	13	38.83015102	293	401.25	0.04628683	0.043147461	0.04927836	0.04468941	0
wormd20121119s72PB1138HK104rt23w06r14	5	HK104.101	HK104	23	11/19/12	14	39.89137551	293	403.393333	0.04384398	0.043147461	0.0454091	0.04468941	0
wormd20121119s72PB1138HK104rt23w06r15	5	HK104.101	HK104	23	11/19/12	15	40.9526	293	399.766667	0.05132794	0.043147461	0.05308527	0.04468941	0
wormd20121119s72PB1138HK104rt23w10r00	9	HK104.102	HK104	23	11/19/12	0	25.03423265	292	450.90301	0.60488978	0.062076187	0.68874834	0.063213085	1
wormd20121119s72PB1138HK104rt23w10r01	9	HK104.102	HK104	23	11/19/12	1	26.09545714	201	486.847291	0.50181859	0.062076187	0.65805302	0.063213085	1
wormd20121119s72PB1138HK104rt23w10r02	9	HK104.102	HK104	23	11/19/12	2	27.15668163	217	447.478632	0.62446813	0.062076187	0.73850919	0.063213085	1
wormd20121119s72PB1138HK104rt23w10r03	9	HK104.102	HK104	23	11/19/12	3	28.21790612	250	459.430769	0.67986951	0.062076187	0.78315535	0.063213085	1
wormd20121119s72PB1138HK104rt23w10r04	9	HK104.102	HK104	23	11/19/12	4	29.27913061	280	477.425087	0.57358495	0.062076187	0.72621279	0.063213085	1
wormd20121119s72PB1138HK104rt23w10r05	9	HK104.102	HK104	23	11/19/12	5	30.3403551	183	442.135514	0.41578216	0.062076187	0.70834613	0.063213085	1
wormd20121119s72PB1138HK104rt23w10r07	9	HK104.102	HK104	23	11/19/12	7	32.46280408	150	504	0.48471396	0.062076187	0.55422438	0.063213085	1
wormd20121119s72PB1138HK104rt23w10r08	9	HK104.102	HK104	23	11/19/12	8	33.52402857	280	475.193103	0.40808123	0.062076187	0.67501691	0.063213085	1
wormd20121119s72PB1138HK104rt23w10r09	9	HK104.102	HK104	23	11/19/12	9	34.58525306	293	526.746667	0.06207619	0.062076187	0.06321309	0.063213085	0
wormd20121119s72PB1138HK104rt23w10r10	9	HK104.102	HK104	23	11/19/12	10	35.64647755	293	420.976667	0.06841682	0.062076187	0.07489725	0.063213085	0
wormd20121119s72PB1138HK104rt23w10r11	9	HK104.102	HK104	23	11/19/12	11	36.70770204	293	416.923333	0.06847621	0.062076187	0.07082839	0.063213085	0
wormd20121119s72PB1138HK104rt23w10r12	9	HK104.102	HK104	23	11/19/12	12	37.76892653	293	430.906667	0.07398491	0.062076187	0.07528237	0.063213085	0
wormd20121119s72PB1138HK104rt23w10r13	9	HK104.102	HK104	23	11/19/12	13	38.83015102	293	437.886667	0.07028684	0.062076187	0.07204499	0.063213085	0
wormd20121119s72PB1138HK104rt23w10r14	9	HK104.102	HK104	23	11/19/12	14	39.89137551	293	443.873333	0.07019764	0.062076187	0.07065902	0.063213085	0
wormd20121119s72PB1138HK104rt23w10r15	9	HK104.102	HK104	23	11/19/12	15	40.9526	293	444.5	0.06755458	0.062076187	0.0685799	0.063213085	0
wormd20121119s72PB1138HK104rt23w11r00	10	HK104.103	HK104	23	11/19/12	0	25.03423265	292	462.561873	0.58813042	0.068316459	0.72264794	0.069660684	1
wormd20121119s72PB1138HK104rt23w11r01	10	HK104.103	HK104	23	11/19/12	1	26.09545714	141	452.304054	0.5491732	0.068316459	0.67743801	0.069660684	1
wormd20121119s72PB1138HK104rt23w11r02	10	HK104.103	HK104	23	11/19/12	2	27.15668163	198	492.405941	0.54057774	0.068316459	0.7146334	0.069660684	1
wormd20121119s72PB1138HK104rt23w11r03	10	HK104.103	HK104	23	11/19/12	3	28.21790612	184	480.240838	0.61695574	0.068316459	0.75636787	0.069660684	1
wormd20121119s72PB1138HK104rt23w11r04	10	HK104.103	HK104	23	11/19/12	4	29.27913061	212	491.486239	0.48415227	0.068316459	0.73877693	0.069660684	1
wormd20121119s72PB1138HK104rt23w11r05	10	HK104.103	HK104	23	11/19/12	5	30.3403551	246	449.249012	0.60045044	0.068316459	0.79222345	0.069660684	1
wormd20121119s72PB1138HK104rt23w11r06	10	HK104.103	HK104	23	11/19/12	6	31.40157959	192	476.540404	0.54324246	0.068316459	0.75633328	0.069660684	1
wormd20121119s72PB1138HK104rt23w11r07	10	HK104.103	HK104	23	11/19/12	7	32.46280408	152	445.816456	0.43532513	0.068316459	0.62025044	0.069660684	1
wormd20121119s72PB1138HK104rt23w11r08	10	HK104.103	HK104	23	11/19/12	8	33.52402857	141	466.326389	0.49454773	0.068316459	0.63687629	0.069660684	1
wormd20121119s72PB1138HK104rt23w11r09	10	HK104.103	HK104	23	11/19/12	9	34.58525306	223	550.675439	0.32313962	0.068316459	0.5200431	0.069660684	1
wormd20121119s72PB1138HK104rt23w11r10	10	HK104.103	HK104	23	11/19/12	10	35.64647755	254	470.701149	0.06831646	0.068316459	0.06973026	0.069660684	0
wormd20121119s72PB1138HK104rt23w11r11	10	HK104.103	HK104	23	11/19/12	11	36.70770204	272	466.505376	0.06961125	0.068316459	0.06987098	0.069660684	0
wormd20121119s72PB1138HK104rt23w11r12	10	HK104.103	HK104	23	11/19/12	12	37.76892653	285	442.630137	0.09476477	0.068316459	0.09557267	0.069660684	0
wormd20121119s72PB1138HK104rt23w11r13	10	HK104.103	HK104	23	11/19/12	13	38.83015102	290	404.393939	0.06866655	0.068316459	0.06968711	0.069660684	0
wormd20121119s72PB1138HK104rt23w11r14	10	HK104.103	HK104	23	11/19/12	14	39.89137551	290	396.946128	0.07005294	0.068316459	0.06966068	0.069660684	0
wormd20121119s72PB1138HK104rt23w12r00	11	HK104.104	HK104	23	11/19/12	0	25.03423265	197	412.269608	0.57904229	0.067380461	0.64981538	0.068073901	1
wormd20121119s72PB1138HK104rt23w12r01	11	HK104.104	HK104	23	11/19/12	1	26.09545714	259	443.477444	0.62603319	0.067380461	0.73133908	0.068073901	1
wormd20121119s72PB1138HK104rt23w12r02	11	HK104.104	HK104	23	11/19/12	2	27.15668163	262	430.813433	0.61113228	0.067380461	0.7639164	0.068073901	1
wormd20121119s72PB1138HK104rt23w12r03	11	HK104.104	HK104	23	11/19/12	3	28.21790612	146	390.437908	0.64576675	0.067380461	0.78673965	0.068073901	1
wormd20121119s72PB1138HK104rt23w12r04	11	HK104.104	HK104	23	11/19/12	4	29.27913061	161	435.445122	0.55646632	0.067380461	0.72760711	0.068073901	1
wormd20121119s72PB1138HK104rt23w12r05	11	HK104.104	HK104	23	11/19/12	5	30.3403551	153	364.993671	0.47575426	0.067380461	0.6739928	0.068073901	1
wormd20121119s72PB1138HK104rt23w12r06	11	HK104.104	HK104	23	11/19/12	6	31.40157959	250	357.548638	0.57973657	0.067380461	0.64371686	0.068073901	1
wormd20121119s72PB1138HK104rt23w12r07	11	HK104.104	HK104	23	11/19/12	7	32.46280408	275	377.716312	0.58731233	0.067380461	0.63513278	0.068073901	1
wormd20121119s72PB1138HK104rt23w12r08	11	HK104.104	HK104	23	11/19/12	8	33.52402857	293	424.256667	0.54384394	0.067380461	0.6002015	0.068073901	1
wormd20121119s72PB1138HK104rt23w12r09	11	HK104.104	HK104	23	11/19/12	9	34.58525306	293	367.856667	0.08191976	0.067380461	0.09284958	0.068073901	0
wormd20121119s72PB1138HK104rt23w12r10	11	HK104.104	HK104	23	11/19/12	10	35.64647755	293	474.753333	0.07475735	0.067380461	0.07552615	0.068073901	0
wormd20121119s72PB1138HK104rt23w12r11	11	HK104.104	HK104	23	11/19/12	11	36.70770204	293	368.15	0.06983148	0.067380461	0.12875989	0.068073901	0
wormd20121119s72PB1138HK104rt23w12r12	11	HK104.104	HK104	23	11/19/12	12	37.76892653	293	375.38	0.06738046	0.067380461	0.0680739	0.068073901	0
wormd20121119s72PB1138HK104rt23w12r13	11	HK104.104	HK104	23	11/19/12	13	38.83015102	293	387.036667	0.0723007	0.067380461	0.07379939	0.068073901	0
wormd20121119s72PB1138HK104rt23w12r14	11	HK104.104	HK104	23	11/19/12	14	39.89137551	293	394.136667	0.07259773	0.067380461	0.07450674	0.068073901	0
wormd20121119s72PB1138HK104rt23w12r15	11	HK104.104	HK104	23	11/19/12	15	40.9526	293	403.196667	0.06998249	0.067380461	0.07150667	0.068073901	0
wormd20121119s72PB1138HK104rt23w16r00	15	HK104.105	HK104	23	11/19/12	0	25.03423265	293	386.15	0.66182051	0.062148469	0.7344579	0.0631798	1
wormd20121119s72PB1138HK104rt23w16r01	15	HK104.105	HK104	23	11/19/12	1	26.09545714	286	390.211604	0.66813339	0.062148469	0.74926013	0.0631798	1
wormd20121119s72PB1138HK104rt23w16r02	15	HK104.105	HK104	23	11/19/12	2	27.15668163	284	397.453608	0.64106673	0.062148469	0.76048689	0.0631798	1
wormd20121119s72PB1138HK104rt23w16r03	15	HK104.105	HK104	23	11/19/12	3	28.21790612	287	405.05137	0.64808366	0.062148469	0.76802117	0.0631798	1
wormd20121119s72PB1138HK104rt23w16r04	15	HK104.105	HK104	23	11/19/12	4	29.27913061	270	399.855596	0.64049071	0.062148469	0.76703994	0.0631798	1
wormd20121119s72PB1138HK104rt23w16r05	15	HK104.105	HK104	23	11/19/12	5	30.3403551	217	417.678571	0.60518432	0.062148469	0.7614247	0.0631798	1
wormd20121119s72PB1138HK104rt23w16r06	15	HK104.105	HK104	23	11/19/12	6	31.40157959	171	336.140541	0.49935754	0.062148469	0.6666761	0.0631798	1
wormd20121119s72PB1138HK104rt23w16r07	15	HK104.105	HK104	23	11/19/12	7	32.46280408	107	393.105263	0.55754058	0.062148469	0.63407968	0.0631798	1
wormd20121119s72PB1138HK104rt23w16r08	15	HK104.105	HK104	23	11/19/12	8	33.52402857	293	419.693333	0.40515591	0.062148469	0.63271664	0.0631798	1
wormd20121119s72PB1138HK104rt23w16r09	15	HK104.105	HK104	23	11/19/12	9	34.58525306	293	403.08	0.12925539	0.062148469	0.34580268	0.0631798	1
wormd20121119s72PB1138HK104rt23w16r10	15	HK104.105	HK104	23	11/19/12	10	35.64647755	293	350.18	0.07229094	0.062148469	0.07857033	0.0631798	0
wormd20121119s72PB1138HK104rt23w16r11	15	HK104.105	HK104	23	11/19/12	11	36.70770204	293	415.963333	0.06938723	0.062148469	0.11094341	0.0631798	0
wormd20121119s72PB1138HK104rt23w16r12	15	HK104.105	HK104	23	11/19/12	12	37.76892653	293	405.073333	0.06332997	0.062148469	0.0643371	0.0631798	0
wormd20121119s72PB1138HK104rt23w16r13	15	HK104.105	HK104	23	11/19/12	13	38.83015102	293	391.046667	0.0670307	0.062148469	0.06804958	0.0631798	0
wormd20121119s72PB1138HK104rt23w16r14	15	HK104.105	HK104	23	11/19/12	14	39.89137551	293	394.8	0.06214847	0.062148469	0.0631798	0.0631798	0
wormd20121119s72PB1138HK104rt23w16r15	15	HK104.105	HK104	23	11/19/12	15	40.9526	293	386.186667	0.0674702	0.062148469	0.07016689	0.0631798	0
wormd20121119s72PB1138HK104rt23w17r00	16	HK104.106	HK104	23	11/19/12	0	25.03423265	247	338.869048	0.58263416	0.071212594	0.74882369	0.072520584	1
wormd20121119s72PB1138HK104rt23w17r01	16	HK104.106	HK104	23	11/19/12	1	26.09545714	220	340.123348	0.64705751	0.071212594	0.79305485	0.072520584	1
wormd20121119s72PB1138HK104rt23w17r02	16	HK104.106	HK104	23	11/19/12	2	27.15668163	130	304.05303	0.60954934	0.071212594	0.74403705	0.072520584	1
wormd20121119s72PB1138HK104rt23w17r03	16	HK104.106	HK104	23	11/19/12	3	28.21790612	150	335.025478	0.69191574	0.071212594	0.80155588	0.072520584	1
wormd20121119s72PB1138HK104rt23w17r04	16	HK104.106	HK104	23	11/19/12	4	29.27913061	118	311.883333	0.68251712	0.071212594	0.83566528	0.072520584	1
wormd20121119s72PB1138HK104rt23w17r05	16	HK104.106	HK104	23	11/19/12	5	30.3403551	164	301.627219	0.64672137	0.071212594	0.81180652	0.072520584	1
wormd20121119s72PB1138HK104rt23w17r06	16	HK104.106	HK104	23	11/19/12	6	31.40157959	125	314.03937	0.67944506	0.071212594	0.80348833	0.072520584	1
wormd20121119s72PB1138HK104rt23w17r09	16	HK104.106	HK104	23	11/19/12	9	34.58525306	293	231.16	0.09306075	0.071212594	0.09634395	0.072520584	0
wormd20121119s72PB1138HK104rt23w17r10	16	HK104.106	HK104	23	11/19/12	10	35.64647755	122	308.382813	0.57171559	0.071212594	0.6341772	0.072520584	1
wormd20121119s72PB1138HK104rt23w17r11	16	HK104.106	HK104	23	11/19/12	11	36.70770204	293	300.736667	0.09704623	0.071212594	0.09865296	0.072520584	0
wormd20121119s72PB1138HK104rt23w17r12	16	HK104.106	HK104	23	11/19/12	12	37.76892653	293	300.606667	0.07194656	0.071212594	0.07252058	0.072520584	0
wormd20121119s72PB1138HK104rt23w17r13	16	HK104.106	HK104	23	11/19/12	13	38.83015102	293	297.353333	0.07121259	0.071212594	0.07258693	0.072520584	0
wormd20121119s72PB1138HK104rt23w18r00	17	HK104.107	HK104	23	11/19/12	0	25.03423265	177	283.417582	0.64863223	0.091904551	0.74401286	0.092203386	1
wormd20121119s72PB1138HK104rt23w18r01	17	HK104.107	HK104	23	11/19/12	1	26.09545714	293	354.903333	0.6009876	0.091904551	0.7524929	0.092203386	1
wormd20121119s72PB1138HK104rt23w18r02	17	HK104.107	HK104	23	11/19/12	2	27.15668163	277	309.789286	0.6747088	0.091904551	0.82134808	0.092203386	1
wormd20121119s72PB1138HK104rt23w18r03	17	HK104.107	HK104	23	11/19/12	3	28.21790612	276	306.777385	0.64226194	0.091904551	0.79419946	0.092203386	1
wormd20121119s72PB1138HK104rt23w18r04	17	HK104.107	HK104	23	11/19/12	4	29.27913061	208	305.7277	0.67864647	0.091904551	0.804318	0.092203386	1
wormd20121119s72PB1138HK104rt23w18r05	17	HK104.107	HK104	23	11/19/12	5	30.3403551	241	296.189516	0.6675755	0.091904551	0.81375426	0.092203386	1
wormd20121119s72PB1138HK104rt23w18r07	17	HK104.107	HK104	23	11/19/12	7	32.46280408	286	346.62116	0.5928692	0.091904551	0.76630419	0.092203386	1
wormd20121119s72PB1138HK104rt23w18r08	17	HK104.107	HK104	23	11/19/12	8	33.52402857	103	218.854545	0.49858486	0.091904551	0.5079146	0.092203386	1
wormd20121119s72PB1138HK104rt23w18r10	17	HK104.107	HK104	23	11/19/12	10	35.64647755	293	251.053333	0.10860388	0.091904551	0.23060344	0.092203386	1
wormd20121119s72PB1138HK104rt23w18r11	17	HK104.107	HK104	23	11/19/12	11	36.70770204	293	247.303333	0.09190455	0.091904551	0.09220339	0.092203386	0
wormd20121119s72PB1138HK104rt23w18r12	17	HK104.107	HK104	23	11/19/12	12	37.76892653	293	244.456667	0.09345967	0.091904551	0.09519169	0.092203386	0
wormd20121119s72PB1138HK104rt23w18r13	17	HK104.107	HK104	23	11/19/12	13	38.83015102	293	236.626667	0.09855498	0.091904551	0.10126898	0.092203386	0
wormd20121119s72PB1138HK104rt23w18r14	17	HK104.107	HK104	23	11/19/12	14	39.89137551	293	216.736667	0.11091268	0.091904551	0.11333938	0.092203386	0
wormd20121119s72PB1138HK104rt23w18r15	17	HK104.107	HK104	23	11/19/12	15	40.9526	263	215.581481	0.11172011	0.091904551	0.11463492	0.092203386	0
wormd20121121s138PB1259HK104rt23w04r00	3	HK104.108	HK104	23	11/21/12	0	25.03423265	293	363.916667	0.56939429	0.069628833	0.64651491	0.069381961	1
wormd20121121s138PB1259HK104rt23w04r01	3	HK104.108	HK104	23	11/21/12	1	26.09545714	241	348.971774	0.66002004	0.069628833	0.72408731	0.069381961	1
wormd20121121s138PB1259HK104rt23w04r02	3	HK104.108	HK104	23	11/21/12	2	27.15668163	209	359.101852	0.58650331	0.069628833	0.69479744	0.069381961	1
wormd20121121s138PB1259HK104rt23w04r06	3	HK104.108	HK104	23	11/21/12	6	31.40157959	174	357.480663	0.61801185	0.069628833	0.71852953	0.069381961	1
wormd20121121s138PB1259HK104rt23w04r15	3	HK104.108	HK104	23	11/21/12	15	40.9526	284	345.819444	0.06962883	0.069628833	0.06938196	0.069381961	0
wormd20121121s138PB1259HK104rt23w05r00	4	HK104.109	HK104	23	11/21/12	0	25.03423265	288	317.99661	0.70343698	0.077923332	0.8016389	0.080056316	1
wormd20121121s138PB1259HK104rt23w05r01	4	HK104.109	HK104	23	11/21/12	1	26.09545714	283	330.182759	0.68068122	0.077923332	0.80496424	0.080056316	1
wormd20121121s138PB1259HK104rt23w05r02	4	HK104.109	HK104	23	11/21/12	2	27.15668163	225	322.969828	0.69143183	0.077923332	0.83487357	0.080056316	1
wormd20121121s138PB1259HK104rt23w05r07	4	HK104.109	HK104	23	11/21/12	7	32.46280408	108	334.357143	0.60803908	0.077923332	0.76533237	0.080056316	1
wormd20121121s138PB1259HK104rt23w05r09	4	HK104.109	HK104	23	11/21/12	9	34.58525306	224	310.349345	0.54870403	0.077923332	0.690822	0.080056316	1
wormd20121121s138PB1259HK104rt23w05r12	4	HK104.109	HK104	23	11/21/12	12	37.76892653	293	273.783333	0.0843028	0.077923332	0.08701383	0.080056316	0
wormd20121121s138PB1259HK104rt23w05r13	4	HK104.109	HK104	23	11/21/12	13	38.83015102	293	285.663333	0.0797512	0.077923332	0.08127934	0.080056316	0
wormd20121121s138PB1259HK104rt23w05r14	4	HK104.109	HK104	23	11/21/12	14	39.89137551	293	296.343333	0.07956475	0.077923332	0.08032213	0.080056316	0
wormd20121121s138PB1259HK104rt23w05r15	4	HK104.109	HK104	23	11/21/12	15	40.9526	293	301.85	0.07792333	0.077923332	0.08005632	0.080056316	0
wormd20121121s138PB1259HK104rt23w06r00	5	HK104.110	HK104	23	11/21/12	0	25.03423265	293	416.52	0.53435079	0.07065811	0.64526422	0.076621698	1
wormd20121121s138PB1259HK104rt23w06r01	5	HK104.110	HK104	23	11/21/12	1	26.09545714	269	379.536232	0.60774252	0.07065811	0.62868438	0.076621698	1
wormd20121121s138PB1259HK104rt23w06r02	5	HK104.110	HK104	23	11/21/12	2	27.15668163	290	424.841751	0.50833243	0.07065811	0.65748635	0.076621698	1
wormd20121121s138PB1259HK104rt23w06r03	5	HK104.110	HK104	23	11/21/12	3	28.21790612	202	378.272727	0.60212775	0.07065811	0.68496892	0.076621698	1
wormd20121121s138PB1259HK104rt23w06r04	5	HK104.110	HK104	23	11/21/12	4	29.27913061	238	392.713115	0.59043744	0.07065811	0.668654	0.076621698	1
wormd20121121s138PB1259HK104rt23w06r05	5	HK104.110	HK104	23	11/21/12	5	30.3403551	273	362.482143	0.58943969	0.07065811	0.71067522	0.076621698	1
wormd20121121s138PB1259HK104rt23w06r06	5	HK104.110	HK104	23	11/21/12	6	31.40157959	285	347.517123	0.63528124	0.07065811	0.77235706	0.076621698	1
wormd20121121s138PB1259HK104rt23w06r07	5	HK104.110	HK104	23	11/21/12	7	32.46280408	271	386.190647	0.59655692	0.07065811	0.67904943	0.076621698	1
wormd20121121s138PB1259HK104rt23w06r08	5	HK104.110	HK104	23	11/21/12	8	33.52402857	284	439.793814	0.40889913	0.07065811	0.54667614	0.076621698	1
wormd20121121s138PB1259HK104rt23w06r09	5	HK104.110	HK104	23	11/21/12	9	34.58525306	235	365.066116	0.44464083	0.07065811	0.71510752	0.076621698	1
wormd20121121s138PB1259HK104rt23w06r10	5	HK104.110	HK104	23	11/21/12	10	35.64647755	293	392.163333	0.07565935	0.07065811	0.0766217	0.076621698	0
wormd20121121s138PB1259HK104rt23w06r11	5	HK104.110	HK104	23	11/21/12	11	36.70770204	293	339.73	0.07065811	0.07065811	0.15622407	0.076621698	1
wormd20121121s138PB1259HK104rt23w06r12	5	HK104.110	HK104	23	11/21/12	12	37.76892653	293	411.17	0.07962206	0.07065811	0.11245783	0.076621698	0
wormd20121121s138PB1259HK104rt23w06r13	5	HK104.110	HK104	23	11/21/12	13	38.83015102	293	406.466667	0.07828744	0.07065811	0.07826043	0.076621698	0
wormd20121121s138PB1259HK104rt23w06r14	5	HK104.110	HK104	23	11/21/12	14	39.89137551	293	410.03	0.07983439	0.07065811	0.08050602	0.076621698	0
wormd20121121s138PB1259HK104rt23w06r15	5	HK104.110	HK104	23	11/21/12	15	40.9526	293	422.113333	0.07859549	0.07065811	0.07986251	0.076621698	0
wormd20121121s138PB1259HK104rt23w10r00	9	HK104.111	HK104	23	11/21/12	0	25.03423265	293	359.463333	0.48457184	0.059187242	0.58319571	0.059770789	1
wormd20121121s138PB1259HK104rt23w10r01	9	HK104.111	HK104	23	11/21/12	1	26.09545714	293	363.523333	0.51281067	0.059187242	0.60611077	0.059770789	1
wormd20121121s138PB1259HK104rt23w10r02	9	HK104.111	HK104	23	11/21/12	2	27.15668163	249	327.859375	0.54427477	0.059187242	0.65147472	0.059770789	1
wormd20121121s138PB1259HK104rt23w10r03	9	HK104.111	HK104	23	11/21/12	3	28.21790612	268	335.658182	0.4798328	0.059187242	0.60949565	0.059770789	1
wormd20121121s138PB1259HK104rt23w10r04	9	HK104.111	HK104	23	11/21/12	4	29.27913061	293	369.383333	0.45363715	0.059187242	0.60257727	0.059770789	1
wormd20121121s138PB1259HK104rt23w10r05	9	HK104.111	HK104	23	11/21/12	5	30.3403551	252	344.598456	0.47645001	0.059187242	0.62717263	0.059770789	1
wormd20121121s138PB1259HK104rt23w10r06	9	HK104.111	HK104	23	11/21/12	6	31.40157959	106	321.009174	0.41184382	0.059187242	0.55181478	0.059770789	1
wormd20121121s138PB1259HK104rt23w10r07	9	HK104.111	HK104	23	11/21/12	7	32.46280408	194	339.253731	0.44842206	0.059187242	0.64892964	0.059770789	1
wormd20121121s138PB1259HK104rt23w10r08	9	HK104.111	HK104	23	11/21/12	8	33.52402857	184	306.37234	0.51717293	0.059187242	0.59400967	0.059770789	1
wormd20121121s138PB1259HK104rt23w10r09	9	HK104.111	HK104	23	11/21/12	9	34.58525306	235	332.23431	0.33492366	0.059187242	0.62744873	0.059770789	1
wormd20121121s138PB1259HK104rt23w10r10	9	HK104.111	HK104	23	11/21/12	10	35.64647755	293	383.44	0.07240168	0.059187242	0.10777253	0.059770789	0
wormd20121121s138PB1259HK104rt23w10r11	9	HK104.111	HK104	23	11/21/12	11	36.70770204	293	391.11	0.06594968	0.059187242	0.06804298	0.059770789	0
wormd20121121s138PB1259HK104rt23w10r12	9	HK104.111	HK104	23	11/21/12	12	37.76892653	293	378.173333	0.05918724	0.059187242	0.05977079	0.059770789	0
wormd20121121s138PB1259HK104rt23w10r13	9	HK104.111	HK104	23	11/21/12	13	38.83015102	293	377.82	0.06872229	0.059187242	0.06810586	0.059770789	0
wormd20121121s138PB1259HK104rt23w10r14	9	HK104.111	HK104	23	11/21/12	14	39.89137551	293	385.323333	0.07285702	0.059187242	0.07375793	0.059770789	0
wormd20121121s138PB1259HK104rt23w10r15	9	HK104.111	HK104	23	11/21/12	15	40.9526	293	392.07	0.07363129	0.059187242	0.07292913	0.059770789	0
wormd20121121s138PB1259HK104rt23w11r00	10	HK104.112	HK104	23	11/21/12	0	25.03423265	293	413.636667	0.55216636	0.038497797	0.61603124	0.069867551	1
wormd20121121s138PB1259HK104rt23w11r01	10	HK104.112	HK104	23	11/21/12	1	26.09545714	266	404.080586	0.57749338	0.038497797	0.6351921	0.069867551	1
wormd20121121s138PB1259HK104rt23w11r02	10	HK104.112	HK104	23	11/21/12	2	27.15668163	100	385.168224	0.54467939	0.038497797	0.67104482	0.069867551	1
wormd20121121s138PB1259HK104rt23w11r03	10	HK104.112	HK104	23	11/21/12	3	28.21790612	233	401.15678	0.60689344	0.038497797	0.70732122	0.069867551	1
wormd20121121s138PB1259HK104rt23w11r04	10	HK104.112	HK104	23	11/21/12	4	29.27913061	136	389.167832	0.60342563	0.038497797	0.74726032	0.069867551	1
wormd20121121s138PB1259HK104rt23w11r05	10	HK104.112	HK104	23	11/21/12	5	30.3403551	225	392.56087	0.48998423	0.038497797	0.71723561	0.069867551	1
wormd20121121s138PB1259HK104rt23w11r06	10	HK104.112	HK104	23	11/21/12	6	31.40157959	119	388.986755	0.57710811	0.038497797	0.7752219	0.069867551	1
wormd20121121s138PB1259HK104rt23w11r09	10	HK104.112	HK104	23	11/21/12	9	34.58525306	141	162.724138	0.07316327	0.038497797	0.16373502	0.069867551	1
wormd20121121s138PB1259HK104rt23w11r10	10	HK104.112	HK104	23	11/21/12	10	35.64647755	177	155.906404	0.0384978	0.038497797	0.10571818	0.069867551	0
wormd20121121s138PB1259HK104rt23w11r11	10	HK104.112	HK104	23	11/21/12	11	36.70770204	180	155.255435	0.04138531	0.038497797	0.08855793	0.069867551	0
wormd20121121s138PB1259HK104rt23w11r12	10	HK104.112	HK104	23	11/21/12	12	37.76892653	208	158.696262	0.04283064	0.038497797	0.0887371	0.069867551	0
wormd20121121s138PB1259HK104rt23w11r13	10	HK104.112	HK104	23	11/21/12	13	38.83015102	108	335.504505	0.07193483	0.038497797	0.06986755	0.069867551	0
wormd20121121s138PB1259HK104rt23w11r15	10	HK104.112	HK104	23	11/21/12	15	40.9526	124	348.134921	0.07368596	0.038497797	0.07610517	0.069867551	0
wormd20121121s138PB1259HK104rt23w12r00	11	HK104.113	HK104	23	11/21/12	0	25.03423265	293	231.066667	0.56765389	0.081011845	0.72040447	0.085137501	1
wormd20121121s138PB1259HK104rt23w12r01	11	HK104.113	HK104	23	11/21/12	1	26.09545714	293	228.18	0.62882846	0.081011845	0.74603821	0.085137501	1
wormd20121121s138PB1259HK104rt23w12r02	11	HK104.113	HK104	23	11/21/12	2	27.15668163	110	188.892857	0.55271409	0.081011845	0.64217148	0.085137501	1
wormd20121121s138PB1259HK104rt23w12r03	11	HK104.113	HK104	23	11/21/12	3	28.21790612	128	179.671756	0.57509424	0.081011845	0.68594243	0.085137501	1
wormd20121121s138PB1259HK104rt23w12r05	11	HK104.113	HK104	23	11/21/12	5	30.3403551	115	197.711864	0.51069606	0.081011845	0.70512476	0.085137501	1
wormd20121121s138PB1259HK104rt23w12r06	11	HK104.113	HK104	23	11/21/12	6	31.40157959	266	217.040293	0.61277789	0.081011845	0.7982688	0.085137501	1
wormd20121121s138PB1259HK104rt23w12r07	11	HK104.113	HK104	23	11/21/12	7	32.46280408	222	141.88	0.70009912	0.081011845	0.80240082	0.085137501	1
wormd20121121s138PB1259HK104rt23w12r09	11	HK104.113	HK104	23	11/21/12	9	34.58525306	148	178.789157	0.42560899	0.081011845	0.73222341	0.085137501	1
wormd20121121s138PB1259HK104rt23w12r10	11	HK104.113	HK104	23	11/21/12	10	35.64647755	293	174.506667	0.08821364	0.081011845	0.09115861	0.085137501	0
wormd20121121s138PB1259HK104rt23w12r11	11	HK104.113	HK104	23	11/21/12	11	36.70770204	293	166.806667	0.09746372	0.081011845	0.09931943	0.085137501	0
wormd20121121s138PB1259HK104rt23w12r12	11	HK104.113	HK104	23	11/21/12	12	37.76892653	293	169.366667	0.08101184	0.081011845	0.0851375	0.085137501	0
wormd20121121s138PB1259HK104rt23w12r13	11	HK104.113	HK104	23	11/21/12	13	38.83015102	293	178.856667	0.08832033	0.081011845	0.08872072	0.085137501	0
wormd20121121s138PB1259HK104rt23w12r14	11	HK104.113	HK104	23	11/21/12	14	39.89137551	293	196.966667	0.09466933	0.081011845	0.09534006	0.085137501	0
wormd20121121s138PB1259HK104rt23w12r15	11	HK104.113	HK104	23	11/21/12	15	40.9526	293	194.663333	0.08821274	0.081011845	0.08786198	0.085137501	0
wormd20121121s138PB1259HK104rt23w16r00	15	HK104.114	HK104	23	11/21/12	0	25.03423265	293	417.536667	0.5709658	0.064965465	0.5784931	0.064063801	1
wormd20121121s138PB1259HK104rt23w16r01	15	HK104.114	HK104	23	11/21/12	1	26.09545714	293	431.436667	0.52781267	0.064965465	0.66057898	0.064063801	1
wormd20121121s138PB1259HK104rt23w16r02	15	HK104.114	HK104	23	11/21/12	2	27.15668163	208	404.571429	0.59522551	0.064965465	0.70541804	0.064063801	1
wormd20121121s138PB1259HK104rt23w16r03	15	HK104.114	HK104	23	11/21/12	3	28.21790612	167	420.701657	0.64896731	0.064965465	0.7079694	0.064063801	1
wormd20121121s138PB1259HK104rt23w16r04	15	HK104.114	HK104	23	11/21/12	4	29.27913061	207	393.96729	0.68897013	0.064965465	0.76777452	0.064063801	1
wormd20121121s138PB1259HK104rt23w16r05	15	HK104.114	HK104	23	11/21/12	5	30.3403551	286	433.086505	0.48718339	0.064965465	0.71168529	0.064063801	1
wormd20121121s138PB1259HK104rt23w16r06	15	HK104.114	HK104	23	11/21/12	6	31.40157959	226	422.266094	0.61785541	0.064965465	0.69377449	0.064063801	1
wormd20121121s138PB1259HK104rt23w16r07	15	HK104.114	HK104	23	11/21/12	7	32.46280408	170	428.413265	0.59916017	0.064965465	0.76132831	0.064063801	1
wormd20121121s138PB1259HK104rt23w16r08	15	HK104.114	HK104	23	11/21/12	8	33.52402857	211	399.701613	0.56648293	0.064965465	0.65281541	0.064063801	1
wormd20121121s138PB1259HK104rt23w16r09	15	HK104.114	HK104	23	11/21/12	9	34.58525306	230	421.752941	0.09064225	0.064965465	0.12834342	0.064063801	0
wormd20121121s138PB1259HK104rt23w16r10	15	HK104.114	HK104	23	11/21/12	10	35.64647755	141	427.555102	0.06693049	0.064965465	0.07450038	0.064063801	0
wormd20121121s138PB1259HK104rt23w16r11	15	HK104.114	HK104	23	11/21/12	11	36.70770204	114	431.421525	0.06737388	0.064965465	0.0819276	0.064063801	0
wormd20121121s138PB1259HK104rt23w16r13	15	HK104.114	HK104	23	11/21/12	13	38.83015102	293	427.906667	0.06968362	0.064965465	0.07027359	0.064063801	0
wormd20121121s138PB1259HK104rt23w16r14	15	HK104.114	HK104	23	11/21/12	14	39.89137551	200	427.949091	0.06496547	0.064965465	0.0640638	0.064063801	0
wormd20121121s138PB1259HK104rt23w17r00	16	HK104.115	HK104	23	11/21/12	0	25.03423265	293	280.256667	0.47103571	0.115301252	0.75078261	0.116776648	1
wormd20121121s138PB1259HK104rt23w17r01	16	HK104.115	HK104	23	11/21/12	1	26.09545714	293	256.583333	0.64009112	0.115301252	0.68969407	0.116776648	1
wormd20121121s138PB1259HK104rt23w17r02	16	HK104.115	HK104	23	11/21/12	2	27.15668163	293	277.46	0.57994989	0.115301252	0.69830919	0.116776648	1
wormd20121121s138PB1259HK104rt23w17r03	16	HK104.115	HK104	23	11/21/12	3	28.21790612	188	236.341969	0.65827355	0.115301252	0.7367915	0.116776648	1
wormd20121121s138PB1259HK104rt23w17r04	16	HK104.115	HK104	23	11/21/12	4	29.27913061	236	266.835391	0.61637929	0.115301252	0.75791718	0.116776648	1
wormd20121121s138PB1259HK104rt23w17r05	16	HK104.115	HK104	23	11/21/12	5	30.3403551	172	239.710227	0.65595218	0.115301252	0.77538324	0.116776648	1
wormd20121121s138PB1259HK104rt23w17r06	16	HK104.115	HK104	23	11/21/12	6	31.40157959	143	215.666667	0.60409661	0.115301252	0.74922947	0.116776648	1
wormd20121121s138PB1259HK104rt23w17r07	16	HK104.115	HK104	23	11/21/12	7	32.46280408	251	256.268199	0.56862919	0.115301252	0.66720495	0.116776648	1
wormd20121121s138PB1259HK104rt23w17r08	16	HK104.115	HK104	23	11/21/12	8	33.52402857	244	232.379447	0.57443416	0.115301252	0.75510178	0.116776648	1
wormd20121121s138PB1259HK104rt23w17r09	16	HK104.115	HK104	23	11/21/12	9	34.58525306	208	251.872807	0.56053995	0.115301252	0.71279459	0.116776648	1
wormd20121121s138PB1259HK104rt23w17r10	16	HK104.115	HK104	23	11/21/12	10	35.64647755	289	167.040541	0.13659217	0.115301252	0.13919849	0.116776648	0
wormd20121121s138PB1259HK104rt23w17r11	16	HK104.115	HK104	23	11/21/12	11	36.70770204	292	168.792642	0.13313625	0.115301252	0.13438975	0.116776648	0
wormd20121121s138PB1259HK104rt23w17r12	16	HK104.115	HK104	23	11/21/12	12	37.76892653	293	181.4	0.12094247	0.115301252	0.12391508	0.116776648	0
wormd20121121s138PB1259HK104rt23w17r13	16	HK104.115	HK104	23	11/21/12	13	38.83015102	289	187.352542	0.11530125	0.115301252	0.11677665	0.116776648	0
wormd20121121s138PB1259HK104rt23w17r14	16	HK104.115	HK104	23	11/21/12	14	39.89137551	293	180.713333	0.12858631	0.115301252	0.13211239	0.116776648	0
wormd20121121s138PB1259HK104rt23w17r15	16	HK104.115	HK104	23	11/21/12	15	40.9526	293	188.516667	0.12195887	0.115301252	0.12376878	0.116776648	0
wormd20121121s138PB1259HK104rt23w18r00	17	HK104.116	HK104	23	11/21/12	0	25.03423265	293	269.86	0.54989574	0.082773335	0.67569766	0.086146424	1
wormd20121121s138PB1259HK104rt23w18r01	17	HK104.116	HK104	23	11/21/12	1	26.09545714	293	270.463333	0.56537688	0.082773335	0.71169113	0.086146424	1
wormd20121121s138PB1259HK104rt23w18r02	17	HK104.116	HK104	23	11/21/12	2	27.15668163	236	210.609053	0.64800422	0.082773335	0.71495582	0.086146424	1
wormd20121121s138PB1259HK104rt23w18r03	17	HK104.116	HK104	23	11/21/12	3	28.21790612	164	242.843373	0.60137785	0.082773335	0.72372454	0.086146424	1
wormd20121121s138PB1259HK104rt23w18r04	17	HK104.116	HK104	23	11/21/12	4	29.27913061	216	200.647059	0.56416726	0.082773335	0.79404497	0.086146424	1
wormd20121121s138PB1259HK104rt23w18r05	17	HK104.116	HK104	23	11/21/12	5	30.3403551	293	272.08	0.5684334	0.082773335	0.69961948	0.086146424	1
wormd20121121s138PB1259HK104rt23w18r06	17	HK104.116	HK104	23	11/21/12	6	31.40157959	202	180.759804	0.71232041	0.082773335	0.7370231	0.086146424	1
wormd20121121s138PB1259HK104rt23w18r07	17	HK104.116	HK104	23	11/21/12	7	32.46280408	175	151.513812	0.51034248	0.082773335	0.59923045	0.086146424	1
wormd20121121s138PB1259HK104rt23w18r08	17	HK104.116	HK104	23	11/21/12	8	33.52402857	123	122.354331	0.09482192	0.082773335	0.26242743	0.086146424	1
wormd20121121s138PB1259HK104rt23w18r09	17	HK104.116	HK104	23	11/21/12	9	34.58525306	171	140.97191	0.16317498	0.082773335	0.38655053	0.086146424	1
wormd20121121s138PB1259HK104rt23w18r10	17	HK104.116	HK104	23	11/21/12	10	35.64647755	293	179.95	0.10627311	0.082773335	0.10941846	0.086146424	0
wormd20121121s138PB1259HK104rt23w18r11	17	HK104.116	HK104	23	11/21/12	11	36.70770204	293	185.473333	0.09366957	0.082773335	0.09861922	0.086146424	0
wormd20121121s138PB1259HK104rt23w18r12	17	HK104.116	HK104	23	11/21/12	12	37.76892653	293	192.01	0.08277334	0.082773335	0.08614642	0.086146424	0
wormd20121121s138PB1259HK104rt23w18r13	17	HK104.116	HK104	23	11/21/12	13	38.83015102	293	189.84	0.0882634	0.082773335	0.08838911	0.086146424	0
wormd20121121s138PB1259HK104rt23w18r14	17	HK104.116	HK104	23	11/21/12	14	39.89137551	293	187.69	0.09171062	0.082773335	0.09640598	0.086146424	0
wormd20121121s138PB1259HK104rt23w18r15	17	HK104.116	HK104	23	11/21/12	15	40.9526	293	177.356667	0.10946823	0.082773335	0.11086177	0.086146424	0
wormd20121123s150PB1133HK104rt23w04r00	3	HK104.117	HK104	23	11/23/12	0	25.03423265	266	427.611722	0.74506218	0.052275014	0.79712832	0.053399384	1
wormd20121123s150PB1133HK104rt23w04r01	3	HK104.117	HK104	23	11/23/12	1	26.09545714	226	435.240343	0.74529085	0.052275014	0.81552305	0.053399384	1
wormd20121123s150PB1133HK104rt23w04r02	3	HK104.117	HK104	23	11/23/12	2	27.15668163	242	433.694779	0.70170095	0.052275014	0.82591828	0.053399384	1
wormd20121123s150PB1133HK104rt23w04r03	3	HK104.117	HK104	23	11/23/12	3	28.21790612	269	443.967391	0.66376857	0.052275014	0.82016063	0.053399384	1
wormd20121123s150PB1133HK104rt23w04r04	3	HK104.117	HK104	23	11/23/12	4	29.27913061	261	444.156716	0.7263809	0.052275014	0.85384381	0.053399384	1
wormd20121123s150PB1133HK104rt23w04r05	3	HK104.117	HK104	23	11/23/12	5	30.3403551	288	433.667797	0.60702346	0.052275014	0.80473197	0.053399384	1
wormd20121123s150PB1133HK104rt23w04r06	3	HK104.117	HK104	23	11/23/12	6	31.40157959	252	451.490347	0.74683666	0.052275014	0.85538282	0.053399384	1
wormd20121123s150PB1133HK104rt23w04r07	3	HK104.117	HK104	23	11/23/12	7	32.46280408	208	452.148837	0.53243199	0.052275014	0.6773906	0.053399384	1
wormd20121123s150PB1133HK104rt23w04r08	3	HK104.117	HK104	23	11/23/12	8	33.52402857	257	441.706714	0.32623237	0.052275014	0.64764092	0.053399384	1
wormd20121123s150PB1133HK104rt23w04r09	3	HK104.117	HK104	23	11/23/12	9	34.58525306	293	407.42	0.05799773	0.052275014	0.06106964	0.053399384	0
wormd20121123s150PB1133HK104rt23w04r10	3	HK104.117	HK104	23	11/23/12	10	35.64647755	293	412.246667	0.06714799	0.052275014	0.15226564	0.053399384	1
wormd20121123s150PB1133HK104rt23w04r11	3	HK104.117	HK104	23	11/23/12	11	36.70770204	293	404.793333	0.06056032	0.052275014	0.0622449	0.053399384	0
wormd20121123s150PB1133HK104rt23w04r12	3	HK104.117	HK104	23	11/23/12	12	37.76892653	293	422.896667	0.0563514	0.052275014	0.05806297	0.053399384	0
wormd20121123s150PB1133HK104rt23w04r13	3	HK104.117	HK104	23	11/23/12	13	38.83015102	293	432.19	0.05401069	0.052275014	0.05490308	0.053399384	0
wormd20121123s150PB1133HK104rt23w04r14	3	HK104.117	HK104	23	11/23/12	14	39.89137551	293	428.37	0.05328826	0.052275014	0.05397165	0.053399384	0
wormd20121123s150PB1133HK104rt23w04r15	3	HK104.117	HK104	23	11/23/12	15	40.9526	293	441.356667	0.05227501	0.052275014	0.05339938	0.053399384	0
wormd20121123s150PB1133HK104rt23w05r00	5	HK104.118	HK104	23	11/23/12	0	25.03423265	276	436.657244	0.53044306	0.057884046	0.57467348	0.059181578	1
wormd20121123s150PB1133HK104rt23w05r01	5	HK104.118	HK104	23	11/23/12	1	26.09545714	293	493.926667	0.60161179	0.057884046	0.62595548	0.059181578	1
wormd20121123s150PB1133HK104rt23w05r02	5	HK104.118	HK104	23	11/23/12	2	27.15668163	231	449.411765	0.60554449	0.057884046	0.6714179	0.059181578	1
wormd20121123s150PB1133HK104rt23w05r03	5	HK104.118	HK104	23	11/23/12	3	28.21790612	247	457.61811	0.57991544	0.057884046	0.67954887	0.059181578	1
wormd20121123s150PB1133HK104rt23w05r04	5	HK104.118	HK104	23	11/23/12	4	29.27913061	291	433.137584	0.5939525	0.057884046	0.69448768	0.059181578	1
wormd20121123s150PB1133HK104rt23w05r05	5	HK104.118	HK104	23	11/23/12	5	30.3403551	207	479.61215	0.63260575	0.057884046	0.77518249	0.059181578	1
wormd20121123s150PB1133HK104rt23w05r06	5	HK104.118	HK104	23	11/23/12	6	31.40157959	278	435.660777	0.52264526	0.057884046	0.71725467	0.059181578	1
wormd20121123s150PB1133HK104rt23w05r07	5	HK104.118	HK104	23	11/23/12	7	32.46280408	293	488.963333	0.25767103	0.057884046	0.60906971	0.059181578	1
wormd20121123s150PB1133HK104rt23w05r08	5	HK104.118	HK104	23	11/23/12	8	33.52402857	293	494.443333	0.34085597	0.057884046	0.56862522	0.059181578	1
wormd20121123s150PB1133HK104rt23w05r09	5	HK104.118	HK104	23	11/23/12	9	34.58525306	293	384.883333	0.05955963	0.057884046	0.06033961	0.059181578	0
wormd20121123s150PB1133HK104rt23w05r10	5	HK104.118	HK104	23	11/23/12	10	35.64647755	290	385.225589	0.0657041	0.057884046	0.07064775	0.059181578	0
wormd20121123s150PB1133HK104rt23w05r11	5	HK104.118	HK104	23	11/23/12	11	36.70770204	293	378.283333	0.06300476	0.057884046	0.069293	0.059181578	0
wormd20121123s150PB1133HK104rt23w05r12	5	HK104.118	HK104	23	11/23/12	12	37.76892653	293	380.38	0.06239017	0.057884046	0.06396909	0.059181578	0
wormd20121123s150PB1133HK104rt23w05r13	5	HK104.118	HK104	23	11/23/12	13	38.83015102	288	390.421769	0.06025904	0.057884046	0.06297127	0.059181578	0
wormd20121123s150PB1133HK104rt23w05r14	5	HK104.118	HK104	23	11/23/12	14	39.89137551	288	413.732203	0.05788405	0.057884046	0.05918158	0.059181578	0
wormd20121123s150PB1133HK104rt23w05r15	5	HK104.118	HK104	23	11/23/12	15	40.9526	271	439.233813	0.06332934	0.057884046	0.06442645	0.059181578	0
wormd20121123s150PB1133HK104rt23w09r00	9	HK104.119	HK104	23	11/23/12	0	25.03423265	283	445.496552	0.67680308	0.04991399	0.77133767	0.050723041	1
wormd20121123s150PB1133HK104rt23w09r01	9	HK104.119	HK104	23	11/23/12	1	26.09545714	238	471.04898	0.69218924	0.04991399	0.80786512	0.050723041	1
wormd20121123s150PB1133HK104rt23w09r02	9	HK104.119	HK104	23	11/23/12	2	27.15668163	285	465.811644	0.68120628	0.04991399	0.81685785	0.050723041	1
wormd20121123s150PB1133HK104rt23w09r03	9	HK104.119	HK104	23	11/23/12	3	28.21790612	277	467.542254	0.63550356	0.04991399	0.7826726	0.050723041	1
wormd20121123s150PB1133HK104rt23w09r04	9	HK104.119	HK104	23	11/23/12	4	29.27913061	258	459.34717	0.65977041	0.04991399	0.8059601	0.050723041	1
wormd20121123s150PB1133HK104rt23w09r05	9	HK104.119	HK104	23	11/23/12	5	30.3403551	192	507.19797	0.7061612	0.04991399	0.81368673	0.050723041	1
wormd20121123s150PB1133HK104rt23w09r06	9	HK104.119	HK104	23	11/23/12	6	31.40157959	136	436.780142	0.68532228	0.04991399	0.81370053	0.050723041	1
wormd20121123s150PB1133HK104rt23w09r07	9	HK104.119	HK104	23	11/23/12	7	32.46280408	185	435.089474	0.36160483	0.04991399	0.68925303	0.050723041	1
wormd20121123s150PB1133HK104rt23w09r08	9	HK104.119	HK104	23	11/23/12	8	33.52402857	289	469.027027	0.30074359	0.04991399	0.66203371	0.050723041	1
wormd20121123s150PB1133HK104rt23w09r09	9	HK104.119	HK104	23	11/23/12	9	34.58525306	293	472.046667	0.06992716	0.04991399	0.12858942	0.050723041	0
wormd20121123s150PB1133HK104rt23w09r10	9	HK104.119	HK104	23	11/23/12	10	35.64647755	293	459.48	0.05128349	0.04991399	0.05280479	0.050723041	0
wormd20121123s150PB1133HK104rt23w09r11	9	HK104.119	HK104	23	11/23/12	11	36.70770204	293	452.913333	0.05198219	0.04991399	0.05274582	0.050723041	0
wormd20121123s150PB1133HK104rt23w09r12	9	HK104.119	HK104	23	11/23/12	12	37.76892653	293	450.056667	0.05282155	0.04991399	0.05316593	0.050723041	0
wormd20121123s150PB1133HK104rt23w09r13	9	HK104.119	HK104	23	11/23/12	13	38.83015102	293	450.78	0.05066712	0.04991399	0.05175174	0.050723041	0
wormd20121123s150PB1133HK104rt23w09r14	9	HK104.119	HK104	23	11/23/12	14	39.89137551	293	445.313333	0.05282007	0.04991399	0.05323991	0.050723041	0
wormd20121123s150PB1133HK104rt23w09r15	9	HK104.119	HK104	23	11/23/12	15	40.9526	293	439.99	0.04991399	0.04991399	0.05072304	0.050723041	0
wormd20121123s150PB1133HK104rt23w10r00	10	HK104.120	HK104	23	11/23/12	0	25.03423265	259	397.770677	0.59365443	0.019376103	0.67641785	0.020168718	1
wormd20121123s150PB1133HK104rt23w10r01	10	HK104.120	HK104	23	11/23/12	1	26.09545714	184	413.417989	0.57350984	0.019376103	0.70476644	0.020168718	1
wormd20121123s150PB1133HK104rt23w10r02	10	HK104.120	HK104	23	11/23/12	2	27.15668163	154	390.358974	0.59745243	0.019376103	0.72000209	0.020168718	1
wormd20121123s150PB1133HK104rt23w10r03	10	HK104.120	HK104	23	11/23/12	3	28.21790612	275	410.078014	0.64329555	0.019376103	0.78434647	0.020168718	1
wormd20121123s150PB1133HK104rt23w10r04	10	HK104.120	HK104	23	11/23/12	4	29.27913061	171	413.432584	0.58040589	0.019376103	0.75612758	0.020168718	1
wormd20121123s150PB1133HK104rt23w10r05	10	HK104.120	HK104	23	11/23/12	5	30.3403551	231	397.164557	0.54554822	0.019376103	0.71223509	0.020168718	1
wormd20121123s150PB1133HK104rt23w10r06	10	HK104.120	HK104	23	11/23/12	6	31.40157959	199	363.078049	0.47737463	0.019376103	0.59516207	0.020168718	1
wormd20121123s150PB1133HK104rt23w10r07	10	HK104.120	HK104	23	11/23/12	7	32.46280408	157	390.222222	0.49948602	0.019376103	0.62557234	0.020168718	1
wormd20121123s150PB1133HK104rt23w10r08	10	HK104.120	HK104	23	11/23/12	8	33.52402857	239	82.2131148	0.0193761	0.019376103	0.02016872	0.020168718	0
wormd20121123s150PB1133HK104rt23w10r09	10	HK104.120	HK104	23	11/23/12	9	34.58525306	250	82.9143969	0.02202934	0.019376103	0.02356944	0.020168718	0
wormd20121123s150PB1133HK104rt23w10r10	10	HK104.120	HK104	23	11/23/12	10	35.64647755	175	85.1428571	0.03384656	0.019376103	0.0368318	0.020168718	0
wormd20121123s150PB1133HK104rt23w10r11	10	HK104.120	HK104	23	11/23/12	11	36.70770204	229	83.7521368	0.02692367	0.019376103	0.02784937	0.020168718	0
wormd20121123s150PB1133HK104rt23w10r12	10	HK104.120	HK104	23	11/23/12	12	37.76892653	234	83.7593361	0.02630343	0.019376103	0.02819657	0.020168718	0
wormd20121123s150PB1133HK104rt23w10r13	10	HK104.120	HK104	23	11/23/12	13	38.83015102	153	84.6	0.02709216	0.019376103	0.02893318	0.020168718	0
wormd20121123s150PB1133HK104rt23w10r14	10	HK104.120	HK104	23	11/23/12	14	39.89137551	215	83.6	0.02414077	0.019376103	0.02413833	0.020168718	0
wormd20121123s150PB1133HK104rt23w10r15	10	HK104.120	HK104	23	11/23/12	15	40.9526	183	84.9210526	0.03075765	0.019376103	0.03269664	0.020168718	0
wormd20121123s150PB1133HK104rt23w11r00	11	HK104.121	HK104	23	11/23/12	0	25.03423265	290	471.824324	0.59493807	0.063313696	0.68838558	0.064247797	1
wormd20121123s150PB1133HK104rt23w11r01	11	HK104.121	HK104	23	11/23/12	1	26.09545714	292	468.9699	0.5946074	0.063313696	0.69777779	0.064247797	1
wormd20121123s150PB1133HK104rt23w11r02	11	HK104.121	HK104	23	11/23/12	2	27.15668163	293	478.886667	0.62901851	0.063313696	0.77109555	0.064247797	1
wormd20121123s150PB1133HK104rt23w11r03	11	HK104.121	HK104	23	11/23/12	3	28.21790612	274	445.185714	0.6311382	0.063313696	0.76162249	0.064247797	1
wormd20121123s150PB1133HK104rt23w11r04	11	HK104.121	HK104	23	11/23/12	4	29.27913061	292	478.963211	0.63476382	0.063313696	0.77121424	0.064247797	1
wormd20121123s150PB1133HK104rt23w11r05	11	HK104.121	HK104	23	11/23/12	5	30.3403551	287	428.285714	0.6452882	0.063313696	0.77772957	0.064247797	1
wormd20121123s150PB1133HK104rt23w11r06	11	HK104.121	HK104	23	11/23/12	6	31.40157959	273	408.217857	0.69335215	0.063313696	0.81264979	0.064247797	1
wormd20121123s150PB1133HK104rt23w11r07	11	HK104.121	HK104	23	11/23/12	7	32.46280408	274	483.754448	0.42511504	0.063313696	0.62479075	0.064247797	1
wormd20121123s150PB1133HK104rt23w11r08	11	HK104.121	HK104	23	11/23/12	8	33.52402857	293	415.673333	0.47236642	0.063313696	0.65158747	0.064247797	1
wormd20121123s150PB1133HK104rt23w11r09	11	HK104.121	HK104	23	11/23/12	9	34.58525306	273	444.157143	0.33424502	0.063313696	0.68748243	0.064247797	1
wormd20121123s150PB1133HK104rt23w11r10	11	HK104.121	HK104	23	11/23/12	10	35.64647755	293	527.1	0.06544516	0.063313696	0.06607448	0.064247797	0
wormd20121123s150PB1133HK104rt23w11r11	11	HK104.121	HK104	23	11/23/12	11	36.70770204	293	515.803333	0.06572732	0.063313696	0.06748383	0.064247797	0
wormd20121123s150PB1133HK104rt23w11r12	11	HK104.121	HK104	23	11/23/12	12	37.76892653	293	489.556667	0.0633137	0.063313696	0.0642478	0.064247797	0
wormd20121123s150PB1133HK104rt23w11r13	11	HK104.121	HK104	23	11/23/12	13	38.83015102	293	470.03	0.069768	0.063313696	0.07161328	0.064247797	0
wormd20121123s150PB1133HK104rt23w11r14	11	HK104.121	HK104	23	11/23/12	14	39.89137551	293	455.446667	0.0685938	0.063313696	0.06944792	0.064247797	0
wormd20121123s150PB1133HK104rt23w11r15	11	HK104.121	HK104	23	11/23/12	15	40.9526	293	460.596667	0.07025953	0.063313696	0.07462325	0.064247797	0
wormd20121123s150PB1133HK104rt23w15r00	15	HK104.122	HK104	23	11/23/12	0	25.03423265	291	421.671141	0.73402183	0.053371811	0.81080175	0.054082803	1
wormd20121123s150PB1133HK104rt23w15r01	15	HK104.122	HK104	23	11/23/12	1	26.09545714	291	436.090604	0.68786768	0.053371811	0.79069559	0.054082803	1
wormd20121123s150PB1133HK104rt23w15r02	15	HK104.122	HK104	23	11/23/12	2	27.15668163	236	451.111111	0.68822662	0.053371811	0.83315031	0.054082803	1
wormd20121123s150PB1133HK104rt23w15r03	15	HK104.122	HK104	23	11/23/12	3	28.21790612	284	435.972509	0.67755762	0.053371811	0.82793326	0.054082803	1
wormd20121123s150PB1133HK104rt23w15r04	15	HK104.122	HK104	23	11/23/12	4	29.27913061	264	436.712177	0.68712686	0.053371811	0.83801012	0.054082803	1
wormd20121123s150PB1133HK104rt23w15r05	15	HK104.122	HK104	23	11/23/12	5	30.3403551	289	447.722973	0.6272363	0.053371811	0.82820358	0.054082803	1
wormd20121123s150PB1133HK104rt23w15r06	15	HK104.122	HK104	23	11/23/12	6	31.40157959	284	434.797251	0.66589214	0.053371811	0.80062098	0.054082803	1
wormd20121123s150PB1133HK104rt23w15r07	15	HK104.122	HK104	23	11/23/12	7	32.46280408	134	434.986667	0.64359739	0.053371811	0.79267206	0.054082803	1
wormd20121123s150PB1133HK104rt23w15r08	15	HK104.122	HK104	23	11/23/12	8	33.52402857	191	420.47	0.56421929	0.053371811	0.72334737	0.054082803	1
wormd20121123s150PB1133HK104rt23w15r09	15	HK104.122	HK104	23	11/23/12	9	34.58525306	293	372.773333	0.07149123	0.053371811	0.07425266	0.054082803	0
wormd20121123s150PB1133HK104rt23w15r10	15	HK104.122	HK104	23	11/23/12	10	35.64647755	293	481.113333	0.06320641	0.053371811	0.09360352	0.054082803	0
wormd20121123s150PB1133HK104rt23w15r11	15	HK104.122	HK104	23	11/23/12	11	36.70770204	293	501.03	0.05569532	0.053371811	0.06614839	0.054082803	0
wormd20121123s150PB1133HK104rt23w15r12	15	HK104.122	HK104	23	11/23/12	12	37.76892653	293	486.346667	0.05414929	0.053371811	0.0555742	0.054082803	0
wormd20121123s150PB1133HK104rt23w15r13	15	HK104.122	HK104	23	11/23/12	13	38.83015102	293	465.976667	0.05724292	0.053371811	0.05776814	0.054082803	0
wormd20121123s150PB1133HK104rt23w15r14	15	HK104.122	HK104	23	11/23/12	14	39.89137551	293	452.716667	0.05711231	0.053371811	0.05785283	0.054082803	0
wormd20121123s150PB1133HK104rt23w15r15	15	HK104.122	HK104	23	11/23/12	15	40.9526	293	439.966667	0.05337181	0.053371811	0.0540828	0.054082803	0
wormd20121123s150PB1133HK104rt23w16r00	16	HK104.123	HK104	23	11/23/12	0	25.03423265	272	381.151625	0.68505516	0.00062289	0.73396667	0.000600719	1
wormd20121123s150PB1133HK104rt23w16r01	16	HK104.123	HK104	23	11/23/12	1	26.09545714	291	423.241611	0.57841142	0.00062289	0.71023131	0.000600719	1
wormd20121123s150PB1133HK104rt23w16r02	16	HK104.123	HK104	23	11/23/12	2	27.15668163	290	388.659933	0.609744	0.00062289	0.76592895	0.000600719	1
wormd20121123s150PB1133HK104rt23w16r03	16	HK104.123	HK104	23	11/23/12	3	28.21790612	282	410.792388	0.62438245	0.00062289	0.78441058	0.000600719	1
wormd20121123s150PB1133HK104rt23w16r04	16	HK104.123	HK104	23	11/23/12	4	29.27913061	287	396.561224	0.67343072	0.00062289	0.7674022	0.000600719	1
wormd20121123s150PB1133HK104rt23w16r05	16	HK104.123	HK104	23	11/23/12	5	30.3403551	284	415.934708	0.70592764	0.00062289	0.83348575	0.000600719	1
wormd20121123s150PB1133HK104rt23w16r06	16	HK104.123	HK104	23	11/23/12	6	31.40157959	286	413.931741	0.3705844	0.00062289	0.66591076	0.000600719	1
wormd20121123s150PB1133HK104rt23w16r07	16	HK104.123	HK104	23	11/23/12	7	32.46280408	293	437.566667	0.40555404	0.00062289	0.62986027	0.000600719	1
wormd20121123s150PB1133HK104rt23w16r08	16	HK104.123	HK104	23	11/23/12	8	33.52402857	238	388.719008	0.11535825	0.00062289	0.45027609	0.000600719	1
wormd20121123s150PB1133HK104rt23w16r09	16	HK104.123	HK104	23	11/23/12	9	34.58525306	293	331.236667	0.07117112	0.00062289	0.07497702	0.000600719	0
wormd20121123s150PB1133HK104rt23w16r10	16	HK104.123	HK104	23	11/23/12	10	35.64647755	285	331.892977	0.07046104	0.00062289	0.07821271	0.000600719	0
wormd20121123s150PB1133HK104rt23w16r12	16	HK104.123	HK104	23	11/23/12	12	37.76892653	197	362.788177	0.06471188	0.00062289	0.06635608	0.000600719	0
wormd20121123s150PB1133HK104rt23w16r13	16	HK104.123	HK104	23	11/23/12	13	38.83015102	256	83.2172285	0.00062289	0.00062289	0.00060072	0.000600719	0
wormd20121123s150PB1133HK104rt23w16r14	16	HK104.123	HK104	23	11/23/12	14	39.89137551	132	384.131387	0.07204399	0.00062289	0.07101157	0.000600719	0
wormd20121123s150PB1133HK104rt23w16r15	16	HK104.123	HK104	23	11/23/12	15	40.9526	293	387.02	0.05961857	0.00062289	0.06060114	0.000600719	0
wormd20121123s150PB1133HK104rt23w17r00	17	HK104.124	HK104	23	11/23/12	0	25.03423265	292	490.0301	0.70083646	0.062434835	0.77723188	0.065012326	1
wormd20121123s150PB1133HK104rt23w17r01	17	HK104.124	HK104	23	11/23/12	1	26.09545714	290	438.616162	0.66352643	0.062434835	0.79729678	0.065012326	1
wormd20121123s150PB1133HK104rt23w17r02	17	HK104.124	HK104	23	11/23/12	2	27.15668163	287	519.816327	0.5836475	0.062434835	0.75716517	0.065012326	1
wormd20121123s150PB1133HK104rt23w17r03	17	HK104.124	HK104	23	11/23/12	3	28.21790612	273	535.7	0.59078954	0.062434835	0.76107462	0.065012326	1
wormd20121123s150PB1133HK104rt23w17r04	17	HK104.124	HK104	23	11/23/12	4	29.27913061	288	458.969492	0.6473244	0.062434835	0.78993972	0.065012326	1
wormd20121123s150PB1133HK104rt23w17r05	17	HK104.124	HK104	23	11/23/12	5	30.3403551	284	442.381443	0.62028077	0.062434835	0.80027613	0.065012326	1
wormd20121123s150PB1133HK104rt23w17r06	17	HK104.124	HK104	23	11/23/12	6	31.40157959	289	532.283784	0.58976104	0.062434835	0.76122609	0.065012326	1
wormd20121123s150PB1133HK104rt23w17r07	17	HK104.124	HK104	23	11/23/12	7	32.46280408	287	456.772109	0.65756709	0.062434835	0.80733154	0.065012326	1
wormd20121123s150PB1133HK104rt23w17r09	17	HK104.124	HK104	23	11/23/12	9	34.58525306	293	531.49	0.13465545	0.062434835	0.51247918	0.065012326	1
wormd20121123s150PB1133HK104rt23w17r10	17	HK104.124	HK104	23	11/23/12	10	35.64647755	293	443.026667	0.06449085	0.062434835	0.06806597	0.065012326	0
wormd20121123s150PB1133HK104rt23w17r11	17	HK104.124	HK104	23	11/23/12	11	36.70770204	293	442.003333	0.06243483	0.062434835	0.06501233	0.065012326	0
wormd20121123s150PB1133HK104rt23w17r12	17	HK104.124	HK104	23	11/23/12	12	37.76892653	293	437.233333	0.07099294	0.062434835	0.092205	0.065012326	0
wormd20121123s150PB1133HK104rt23w17r13	17	HK104.124	HK104	23	11/23/12	13	38.83015102	293	436.7	0.06872976	0.062434835	0.07186308	0.065012326	0
wormd20121123s150PB1133HK104rt23w17r14	17	HK104.124	HK104	23	11/23/12	14	39.89137551	293	436.34	0.06757492	0.062434835	0.06899067	0.065012326	0
wormd20121123s150PB1133HK104rt23w17r15	17	HK104.124	HK104	23	11/23/12	15	40.9526	293	461.733333	0.06869261	0.062434835	0.06951901	0.065012326	0
wormd20121124s203PB1201HK104rt23w04r00	3	HK104.125	HK104	23	11/24/12	0	25.03423265	293	400.24	0.57204903	0.070799012	0.7329849	0.073095953	1
wormd20121124s203PB1201HK104rt23w04r01	3	HK104.125	HK104	23	11/24/12	1	26.09545714	255	385.307692	0.66144556	0.070799012	0.77726862	0.073095953	1
wormd20121124s203PB1201HK104rt23w04r02	3	HK104.125	HK104	23	11/24/12	2	27.15668163	219	393.526549	0.65029577	0.070799012	0.79090943	0.073095953	1
wormd20121124s203PB1201HK104rt23w04r03	3	HK104.125	HK104	23	11/24/12	3	28.21790612	193	386.190955	0.68431757	0.070799012	0.7864833	0.073095953	1
wormd20121124s203PB1201HK104rt23w04r04	3	HK104.125	HK104	23	11/24/12	4	29.27913061	170	376.327684	0.73915199	0.070799012	0.84320466	0.073095953	1
wormd20121124s203PB1201HK104rt23w04r05	3	HK104.125	HK104	23	11/24/12	5	30.3403551	160	382.79558	0.5438004	0.070799012	0.63577975	0.073095953	1
wormd20121124s203PB1201HK104rt23w04r07	3	HK104.125	HK104	23	11/24/12	7	32.46280408	239	361.556	0.58985952	0.070799012	0.69749253	0.073095953	1
wormd20121124s203PB1201HK104rt23w04r09	3	HK104.125	HK104	23	11/24/12	9	34.58525306	256	316.927203	0.12091336	0.070799012	0.13724757	0.073095953	0
wormd20121124s203PB1201HK104rt23w04r10	3	HK104.125	HK104	23	11/24/12	10	35.64647755	247	282.291188	0.10029201	0.070799012	0.10607791	0.073095953	0
wormd20121124s203PB1201HK104rt23w04r11	3	HK104.125	HK104	23	11/24/12	11	36.70770204	163	297.945813	0.09504939	0.070799012	0.09934169	0.073095953	0
wormd20121124s203PB1201HK104rt23w04r12	3	HK104.125	HK104	23	11/24/12	12	37.76892653	292	292.829431	0.09889352	0.070799012	0.09966797	0.073095953	0
wormd20121124s203PB1201HK104rt23w04r13	3	HK104.125	HK104	23	11/24/12	13	38.83015102	237	324.161157	0.11026112	0.070799012	0.12216194	0.073095953	0
wormd20121124s203PB1201HK104rt23w04r14	3	HK104.125	HK104	23	11/24/12	14	39.89137551	293	345.66	0.07994005	0.070799012	0.08185852	0.073095953	0
wormd20121124s203PB1201HK104rt23w04r15	3	HK104.125	HK104	23	11/24/12	15	40.9526	293	349.27	0.07079901	0.070799012	0.07309595	0.073095953	0
wormd20121124s203PB1201HK104rt23w05r00	4	HK104.126	HK104	23	11/24/12	0	25.03423265	293	346.786667	0.6051134	0.069422453	0.71084511	0.077282028	1
wormd20121124s203PB1201HK104rt23w05r01	4	HK104.126	HK104	23	11/24/12	1	26.09545714	293	380.716667	0.57595424	0.069422453	0.70024974	0.077282028	1
wormd20121124s203PB1201HK104rt23w05r02	4	HK104.126	HK104	23	11/24/12	2	27.15668163	291	388.043624	0.567784	0.069422453	0.72876741	0.077282028	1
wormd20121124s203PB1201HK104rt23w05r03	4	HK104.126	HK104	23	11/24/12	3	28.21790612	169	381.119318	0.57573929	0.069422453	0.76127069	0.077282028	1
wormd20121124s203PB1201HK104rt23w05r04	4	HK104.126	HK104	23	11/24/12	4	29.27913061	179	353.668421	0.5367309	0.069422453	0.71899408	0.077282028	1
wormd20121124s203PB1201HK104rt23w05r07	4	HK104.126	HK104	23	11/24/12	7	32.46280408	113	268.254237	0.2623553	0.069422453	0.42563758	0.077282028	1
wormd20121124s203PB1201HK104rt23w05r08	4	HK104.126	HK104	23	11/24/12	8	33.52402857	285	408.547945	0.10489438	0.069422453	0.10520697	0.077282028	0
wormd20121124s203PB1201HK104rt23w05r09	4	HK104.126	HK104	23	11/24/12	9	34.58525306	123	347.669231	0.10019725	0.069422453	0.14335921	0.077282028	1
wormd20121124s203PB1201HK104rt23w05r12	4	HK104.126	HK104	23	11/24/12	12	37.76892653	110	399.453782	0.06942245	0.069422453	0.07728203	0.077282028	0
wormd20121124s203PB1201HK104rt23w05r15	4	HK104.126	HK104	23	11/24/12	15	40.9526	293	354.566667	0.11514261	0.069422453	0.11602333	0.077282028	0
wormd20121124s203PB1201HK104rt23w06r00	5	HK104.127	HK104	23	11/24/12	0	25.03423265	293	384.826667	0.65527851	0.073289421	0.69864316	0.075350723	1
wormd20121124s203PB1201HK104rt23w06r01	5	HK104.127	HK104	23	11/24/12	1	26.09545714	293	404.683333	0.62336578	0.073289421	0.73842283	0.075350723	1
wormd20121124s203PB1201HK104rt23w06r02	5	HK104.127	HK104	23	11/24/12	2	27.15668163	293	387.77	0.59426653	0.073289421	0.75715105	0.075350723	1
wormd20121124s203PB1201HK104rt23w06r03	5	HK104.127	HK104	23	11/24/12	3	28.21790612	292	400.471572	0.61085263	0.073289421	0.78222767	0.075350723	1
wormd20121124s203PB1201HK104rt23w06r04	5	HK104.127	HK104	23	11/24/12	4	29.27913061	279	398.559859	0.63013783	0.073289421	0.78711123	0.075350723	1
wormd20121124s203PB1201HK104rt23w06r06	5	HK104.127	HK104	23	11/24/12	6	31.40157959	290	382.89899	0.54268976	0.073289421	0.69604696	0.075350723	1
wormd20121124s203PB1201HK104rt23w06r07	5	HK104.127	HK104	23	11/24/12	7	32.46280408	109	262.789474	0.37021272	0.073289421	0.44189905	0.075350723	1
wormd20121124s203PB1201HK104rt23w06r09	5	HK104.127	HK104	23	11/24/12	9	34.58525306	293	320.603333	0.0811603	0.073289421	0.08440056	0.075350723	0
wormd20121124s203PB1201HK104rt23w06r10	5	HK104.127	HK104	23	11/24/12	10	35.64647755	293	315.7	0.08105978	0.073289421	0.0866634	0.075350723	0
wormd20121124s203PB1201HK104rt23w06r11	5	HK104.127	HK104	23	11/24/12	11	36.70770204	293	319.666667	0.07328942	0.073289421	0.07535072	0.075350723	0
wormd20121124s203PB1201HK104rt23w06r12	5	HK104.127	HK104	23	11/24/12	12	37.76892653	293	333.456667	0.07943676	0.073289421	0.08134721	0.075350723	0
wormd20121124s203PB1201HK104rt23w06r13	5	HK104.127	HK104	23	11/24/12	13	38.83015102	293	345.406667	0.07606025	0.073289421	0.07851742	0.075350723	0
wormd20121124s203PB1201HK104rt23w06r14	5	HK104.127	HK104	23	11/24/12	14	39.89137551	293	361.633333	0.07472556	0.073289421	0.07838609	0.075350723	0
wormd20121124s203PB1201HK104rt23w06r15	5	HK104.127	HK104	23	11/24/12	15	40.9526	293	363.183333	0.08200657	0.073289421	0.08356982	0.075350723	0
wormd20121124s203PB1201HK104rt23w10r00	9	HK104.128	HK104	23	11/24/12	0	25.03423265	293	445.146667	0.62668031	0.055262785	0.70706225	0.056887719	1
wormd20121124s203PB1201HK104rt23w10r01	9	HK104.128	HK104	23	11/24/12	1	26.09545714	132	452.263158	0.63311129	0.055262785	0.74968207	0.056887719	1
wormd20121124s203PB1201HK104rt23w10r02	9	HK104.128	HK104	23	11/24/12	2	27.15668163	265	457.514184	0.64686957	0.055262785	0.7935339	0.056887719	1
wormd20121124s203PB1201HK104rt23w10r03	9	HK104.128	HK104	23	11/24/12	3	28.21790612	227	485.667969	0.66324991	0.055262785	0.79511847	0.056887719	1
wormd20121124s203PB1201HK104rt23w10r05	9	HK104.128	HK104	23	11/24/12	5	30.3403551	110	451.644172	0.594254	0.055262785	0.78535894	0.056887719	1
wormd20121124s203PB1201HK104rt23w10r06	9	HK104.128	HK104	23	11/24/12	6	31.40157959	113	433.65285	0.54170051	0.055262785	0.78280573	0.056887719	1
wormd20121124s203PB1201HK104rt23w10r09	9	HK104.128	HK104	23	11/24/12	9	34.58525306	293	512.496667	0.05529382	0.055262785	0.05696695	0.056887719	0
wormd20121124s203PB1201HK104rt23w10r10	9	HK104.128	HK104	23	11/24/12	10	35.64647755	293	475.58	0.07221561	0.055262785	0.18714476	0.056887719	1
wormd20121124s203PB1201HK104rt23w10r11	9	HK104.128	HK104	23	11/24/12	11	36.70770204	293	447.146667	0.06029743	0.055262785	0.06280045	0.056887719	0
wormd20121124s203PB1201HK104rt23w10r12	9	HK104.128	HK104	23	11/24/12	12	37.76892653	293	433.196667	0.0634713	0.055262785	0.0651234	0.056887719	0
wormd20121124s203PB1201HK104rt23w10r13	9	HK104.128	HK104	23	11/24/12	13	38.83015102	293	417.66	0.06442502	0.055262785	0.06527667	0.056887719	0
wormd20121124s203PB1201HK104rt23w10r14	9	HK104.128	HK104	23	11/24/12	14	39.89137551	293	403.796667	0.0703696	0.055262785	0.07232213	0.056887719	0
wormd20121124s203PB1201HK104rt23w10r15	9	HK104.128	HK104	23	11/24/12	15	40.9526	293	428.23	0.05526278	0.055262785	0.05688772	0.056887719	0
wormd20121124s203PB1201HK104rt23w11r00	10	HK104.129	HK104	23	11/24/12	0	25.03423265	293	436.01	0.47421149	0.046892183	0.66181975	0.046413627	1
wormd20121124s203PB1201HK104rt23w11r01	10	HK104.129	HK104	23	11/24/12	1	26.09545714	293	437.33	0.54493976	0.046892183	0.71240031	0.046413627	1
wormd20121124s203PB1201HK104rt23w11r02	10	HK104.129	HK104	23	11/24/12	2	27.15668163	217	398.504464	0.61441215	0.046892183	0.79197675	0.046413627	1
wormd20121124s203PB1201HK104rt23w11r03	10	HK104.129	HK104	23	11/24/12	3	28.21790612	292	433.501672	0.55754206	0.046892183	0.74325672	0.046413627	1
wormd20121124s203PB1201HK104rt23w11r04	10	HK104.129	HK104	23	11/24/12	4	29.27913061	227	188.773504	0.20991864	0.046892183	0.2351767	0.046413627	1
wormd20121124s203PB1201HK104rt23w11r05	10	HK104.129	HK104	23	11/24/12	5	30.3403551	241	132.887097	0.04689218	0.046892183	0.04641363	0.046413627	0
wormd20121124s203PB1201HK104rt23w11r06	10	HK104.129	HK104	23	11/24/12	6	31.40157959	205	240.886792	0.24844637	0.046892183	0.31053941	0.046413627	1
wormd20121124s203PB1201HK104rt23w11r07	10	HK104.129	HK104	23	11/24/12	7	32.46280408	190	397.395455	0.36255741	0.046892183	0.62553142	0.046413627	1
wormd20121124s203PB1201HK104rt23w11r09	10	HK104.129	HK104	23	11/24/12	9	34.58525306	293	383.643333	0.06701947	0.046892183	0.07008024	0.046413627	0
wormd20121124s203PB1201HK104rt23w11r10	10	HK104.129	HK104	23	11/24/12	10	35.64647755	293	333.13	0.0751849	0.046892183	0.09719805	0.046413627	0
wormd20121124s203PB1201HK104rt23w11r11	10	HK104.129	HK104	23	11/24/12	11	36.70770204	293	329.03	0.07367512	0.046892183	0.07617493	0.046413627	0
wormd20121124s203PB1201HK104rt23w11r12	10	HK104.129	HK104	23	11/24/12	12	37.76892653	293	328.226667	0.07366387	0.046892183	0.07597556	0.046413627	0
wormd20121124s203PB1201HK104rt23w11r13	10	HK104.129	HK104	23	11/24/12	13	38.83015102	293	349.67	0.07643986	0.046892183	0.07849312	0.046413627	0
wormd20121124s203PB1201HK104rt23w11r14	10	HK104.129	HK104	23	11/24/12	14	39.89137551	293	381.67	0.07623044	0.046892183	0.0768401	0.046413627	0
wormd20121124s203PB1201HK104rt23w11r15	10	HK104.129	HK104	23	11/24/12	15	40.9526	293	413.793333	0.05124479	0.046892183	0.0528775	0.046413627	0
wormd20121124s203PB1201HK104rt23w12r00	11	HK104.130	HK104	23	11/24/12	0	25.03423265	293	281.76	0.58166809	0.071532443	0.72646719	0.0741957	1
wormd20121124s203PB1201HK104rt23w12r01	11	HK104.130	HK104	23	11/24/12	1	26.09545714	293	272.463333	0.66355856	0.071532443	0.77778193	0.0741957	1
wormd20121124s203PB1201HK104rt23w12r02	11	HK104.130	HK104	23	11/24/12	2	27.15668163	213	287.668182	0.65217559	0.071532443	0.78477591	0.0741957	1
wormd20121124s203PB1201HK104rt23w12r04	11	HK104.130	HK104	23	11/24/12	4	29.27913061	262	271.313208	0.57249691	0.071532443	0.73081057	0.0741957	1
wormd20121124s203PB1201HK104rt23w12r05	11	HK104.130	HK104	23	11/24/12	5	30.3403551	148	182.103896	0.6319927	0.071532443	0.67255844	0.0741957	1
wormd20121124s203PB1201HK104rt23w12r06	11	HK104.130	HK104	23	11/24/12	6	31.40157959	181	109.962366	0.26201482	0.071532443	0.27409026	0.0741957	1
wormd20121124s203PB1201HK104rt23w12r07	11	HK104.130	HK104	23	11/24/12	7	32.46280408	103	170.081818	0.6688819	0.071532443	0.68172123	0.0741957	1
wormd20121124s203PB1201HK104rt23w12r08	11	HK104.130	HK104	23	11/24/12	8	33.52402857	293	236.963333	0.07410551	0.071532443	0.07754598	0.0741957	0
wormd20121124s203PB1201HK104rt23w12r09	11	HK104.130	HK104	23	11/24/12	9	34.58525306	293	230.896667	0.0727971	0.071532443	0.07674905	0.0741957	0
wormd20121124s203PB1201HK104rt23w12r10	11	HK104.130	HK104	23	11/24/12	10	35.64647755	293	207.183333	0.08785591	0.071532443	0.09137255	0.0741957	0
wormd20121124s203PB1201HK104rt23w12r11	11	HK104.130	HK104	23	11/24/12	11	36.70770204	293	209.676667	0.09042166	0.071532443	0.09379106	0.0741957	0
wormd20121124s203PB1201HK104rt23w12r12	11	HK104.130	HK104	23	11/24/12	12	37.76892653	293	210.05	0.08323153	0.071532443	0.0858764	0.0741957	0
wormd20121124s203PB1201HK104rt23w12r13	11	HK104.130	HK104	23	11/24/12	13	38.83015102	293	217.16	0.08506749	0.071532443	0.08846628	0.0741957	0
wormd20121124s203PB1201HK104rt23w12r14	11	HK104.130	HK104	23	11/24/12	14	39.89137551	293	237.193333	0.07524369	0.071532443	0.07886966	0.0741957	0
wormd20121124s203PB1201HK104rt23w12r15	11	HK104.130	HK104	23	11/24/12	15	40.9526	293	243.396667	0.07153244	0.071532443	0.0741957	0.0741957	0
wormd20121124s203PB1201HK104rt23w16r00	15	HK104.131	HK104	23	11/24/12	0	25.03423265	293	519.153333	0.58590919	0.069044106	0.7163714	0.07019491	1
wormd20121124s203PB1201HK104rt23w16r01	15	HK104.131	HK104	23	11/24/12	1	26.09545714	292	523.926421	0.61766357	0.069044106	0.7571741	0.07019491	1
wormd20121124s203PB1201HK104rt23w16r02	15	HK104.131	HK104	23	11/24/12	2	27.15668163	237	499.872951	0.6509703	0.069044106	0.80904754	0.07019491	1
wormd20121124s203PB1201HK104rt23w16r03	15	HK104.131	HK104	23	11/24/12	3	28.21790612	217	516.02193	0.64200572	0.069044106	0.81325895	0.07019491	1
wormd20121124s203PB1201HK104rt23w16r04	15	HK104.131	HK104	23	11/24/12	4	29.27913061	235	508.069959	0.62042018	0.069044106	0.79844571	0.07019491	1
wormd20121124s203PB1201HK104rt23w16r05	15	HK104.131	HK104	23	11/24/12	5	30.3403551	221	502.788845	0.59182409	0.069044106	0.73905914	0.07019491	1
wormd20121124s203PB1201HK104rt23w16r06	15	HK104.131	HK104	23	11/24/12	6	31.40157959	122	516.673759	0.58317543	0.069044106	0.72109437	0.07019491	1
wormd20121124s203PB1201HK104rt23w16r07	15	HK104.131	HK104	23	11/24/12	7	32.46280408	183	482.5	0.54072102	0.069044106	0.7695206	0.07019491	1
wormd20121124s203PB1201HK104rt23w16r08	15	HK104.131	HK104	23	11/24/12	8	33.52402857	210	498.734513	0.56034718	0.069044106	0.77659334	0.07019491	1
wormd20121124s203PB1201HK104rt23w16r09	15	HK104.131	HK104	23	11/24/12	9	34.58525306	290	475.69697	0.37597151	0.069044106	0.69633163	0.07019491	1
wormd20121124s203PB1201HK104rt23w16r10	15	HK104.131	HK104	23	11/24/12	10	35.64647755	280	419.216028	0.07672155	0.069044106	0.08148624	0.07019491	0
wormd20121124s203PB1201HK104rt23w16r11	15	HK104.131	HK104	23	11/24/12	11	36.70770204	290	419.959596	0.07894228	0.069044106	0.08103664	0.07019491	0
wormd20121124s203PB1201HK104rt23w16r13	15	HK104.131	HK104	23	11/24/12	13	38.83015102	272	425.367133	0.0735517	0.069044106	0.07555237	0.07019491	0
wormd20121124s203PB1201HK104rt23w16r14	15	HK104.131	HK104	23	11/24/12	14	39.89137551	293	427.813333	0.07495401	0.069044106	0.077373	0.07019491	0
wormd20121124s203PB1201HK104rt23w16r15	15	HK104.131	HK104	23	11/24/12	15	40.9526	293	445.716667	0.06904411	0.069044106	0.07019491	0.07019491	0
wormd20121124s203PB1201HK104rt23w17r00	16	HK104.132	HK104	23	11/24/12	0	25.03423265	293	324.84	0.5932553	0.055387376	0.71307758	0.063190978	1
wormd20121124s203PB1201HK104rt23w17r01	16	HK104.132	HK104	23	11/24/12	1	26.09545714	291	320.013423	0.59837536	0.055387376	0.76301938	0.063190978	1
wormd20121124s203PB1201HK104rt23w17r02	16	HK104.132	HK104	23	11/24/12	2	27.15668163	267	304.565693	0.65850257	0.055387376	0.8066605	0.063190978	1
wormd20121124s203PB1201HK104rt23w17r03	16	HK104.132	HK104	23	11/24/12	3	28.21790612	276	308.75265	0.63008964	0.055387376	0.79892865	0.063190978	1
wormd20121124s203PB1201HK104rt23w17r04	16	HK104.132	HK104	23	11/24/12	4	29.27913061	201	314.975845	0.60521168	0.055387376	0.77791654	0.063190978	1
wormd20121124s203PB1201HK104rt23w17r05	16	HK104.132	HK104	23	11/24/12	5	30.3403551	202	307.574163	0.6010156	0.055387376	0.78899794	0.063190978	1
wormd20121124s203PB1201HK104rt23w17r06	16	HK104.132	HK104	23	11/24/12	6	31.40157959	146	312.668874	0.49798485	0.055387376	0.71694498	0.063190978	1
wormd20121124s203PB1201HK104rt23w17r07	16	HK104.132	HK104	23	11/24/12	7	32.46280408	149	267.263158	0.46056614	0.055387376	0.62796367	0.063190978	1
wormd20121124s203PB1201HK104rt23w17r08	16	HK104.132	HK104	23	11/24/12	8	33.52402857	267	298.478102	0.59262307	0.055387376	0.72136257	0.063190978	1
wormd20121124s203PB1201HK104rt23w17r09	16	HK104.132	HK104	23	11/24/12	9	34.58525306	181	103.72043	0.16414954	0.055387376	0.18899188	0.063190978	1
wormd20121124s203PB1201HK104rt23w17r10	16	HK104.132	HK104	23	11/24/12	10	35.64647755	293	333.736667	0.05538738	0.055387376	0.06319098	0.063190978	0
wormd20121124s203PB1201HK104rt23w17r11	16	HK104.132	HK104	23	11/24/12	11	36.70770204	293	256.503333	0.07240247	0.055387376	0.09397087	0.063190978	0
wormd20121124s203PB1201HK104rt23w17r12	16	HK104.132	HK104	23	11/24/12	12	37.76892653	293	261.853333	0.062061	0.055387376	0.06820032	0.063190978	0
wormd20121124s203PB1201HK104rt23w17r13	16	HK104.132	HK104	23	11/24/12	13	38.83015102	293	261.143333	0.06423377	0.055387376	0.06716587	0.063190978	0
wormd20121124s203PB1201HK104rt23w17r14	16	HK104.132	HK104	23	11/24/12	14	39.89137551	293	267.93	0.06660188	0.055387376	0.06768903	0.063190978	0
wormd20121124s203PB1201HK104rt23w17r15	16	HK104.132	HK104	23	11/24/12	15	40.9526	293	291.413333	0.07811376	0.055387376	0.08105184	0.063190978	0
wormd20121124s203PB1201HK104rt23w18r00	17	HK104.133	HK104	23	11/24/12	0	25.03423265	291	470.607383	0.59408282	0.066734284	0.70926427	0.067347461	1
wormd20121124s203PB1201HK104rt23w18r01	17	HK104.133	HK104	23	11/24/12	1	26.09545714	291	464.513423	0.60128384	0.066734284	0.74165139	0.067347461	1
wormd20121124s203PB1201HK104rt23w18r02	17	HK104.133	HK104	23	11/24/12	2	27.15668163	293	479.293333	0.5861665	0.066734284	0.7474366	0.067347461	1
wormd20121124s203PB1201HK104rt23w18r03	17	HK104.133	HK104	23	11/24/12	3	28.21790612	241	408.258065	0.72360831	0.066734284	0.82447171	0.067347461	1
wormd20121124s203PB1201HK104rt23w18r04	17	HK104.133	HK104	23	11/24/12	4	29.27913061	281	423.965278	0.67962382	0.066734284	0.80913401	0.067347461	1
wormd20121124s203PB1201HK104rt23w18r05	17	HK104.133	HK104	23	11/24/12	5	30.3403551	289	405.908784	0.59499242	0.066734284	0.77695311	0.067347461	1
wormd20121124s203PB1201HK104rt23w18r06	17	HK104.133	HK104	23	11/24/12	6	31.40157959	291	488.265101	0.35733006	0.066734284	0.69488538	0.067347461	1
wormd20121124s203PB1201HK104rt23w18r07	17	HK104.133	HK104	23	11/24/12	7	32.46280408	291	360.83557	0.50013531	0.066734284	0.76870976	0.067347461	1
wormd20121124s203PB1201HK104rt23w18r08	17	HK104.133	HK104	23	11/24/12	8	33.52402857	293	379.046667	0.07832429	0.066734284	0.15673578	0.067347461	1
wormd20121124s203PB1201HK104rt23w18r09	17	HK104.133	HK104	23	11/24/12	9	34.58525306	293	403.05	0.06673428	0.066734284	0.06734746	0.067347461	0
wormd20121124s203PB1201HK104rt23w18r10	17	HK104.133	HK104	23	11/24/12	10	35.64647755	293	412.593333	0.07789423	0.066734284	0.11421408	0.067347461	0
wormd20121124s203PB1201HK104rt23w18r11	17	HK104.133	HK104	23	11/24/12	11	36.70770204	293	420.306667	0.08017006	0.066734284	0.08500124	0.067347461	0
wormd20121124s203PB1201HK104rt23w18r12	17	HK104.133	HK104	23	11/24/12	12	37.76892653	293	419.933333	0.08543259	0.066734284	0.08598709	0.067347461	0
wormd20121124s203PB1201HK104rt23w18r13	17	HK104.133	HK104	23	11/24/12	13	38.83015102	293	420.663333	0.08165759	0.066734284	0.08274779	0.067347461	0
wormd20121124s203PB1201HK104rt23w18r14	17	HK104.133	HK104	23	11/24/12	14	39.89137551	293	406.936667	0.07380064	0.066734284	0.07423668	0.067347461	0
wormd20121124s203PB1201HK104rt23w18r15	17	HK104.133	HK104	23	11/24/12	15	40.9526	293	375.98	0.07171775	0.066734284	0.07379199	0.067347461	0
wormd20121126s219HK104AF16rt23w01r00	0	HK104.134	HK104	23	11/26/12	0	25.03423265	135	595.424731	0.50521963	0.081232267	0.64700099	0.081683274	1
wormd20121126s219HK104AF16rt23w01r01	0	HK104.134	HK104	23	11/26/12	1	26.09545714	280	642.323944	0.53861706	0.081232267	0.68730797	0.081683274	1
wormd20121126s219HK104AF16rt23w01r02	0	HK104.134	HK104	23	11/26/12	2	27.15668163	239	629.254753	0.50199076	0.081232267	0.69305229	0.081683274	1
wormd20121126s219HK104AF16rt23w01r03	0	HK104.134	HK104	23	11/26/12	3	28.21790612	219	638.550607	0.51546683	0.081232267	0.71708407	0.081683274	1
wormd20121126s219HK104AF16rt23w01r04	0	HK104.134	HK104	23	11/26/12	4	29.27913061	232	600.025105	0.61321357	0.081232267	0.75170198	0.081683274	1
wormd20121126s219HK104AF16rt23w01r05	0	HK104.134	HK104	23	11/26/12	5	30.3403551	103	616.6	0.54229466	0.081232267	0.72428419	0.081683274	1
wormd20121126s219HK104AF16rt23w01r06	0	HK104.134	HK104	23	11/26/12	6	31.40157959	233	600.916364	0.571873	0.081232267	0.69658601	0.081683274	1
wormd20121126s219HK104AF16rt23w01r08	0	HK104.134	HK104	23	11/26/12	8	33.52402857	138	606.494048	0.45618183	0.081232267	0.54627435	0.081683274	1
wormd20121126s219HK104AF16rt23w01r10	0	HK104.134	HK104	23	11/26/12	10	35.64647755	118	604.865546	0.08752664	0.081232267	0.14278628	0.081683274	1
wormd20121126s219HK104AF16rt23w01r11	0	HK104.134	HK104	23	11/26/12	11	36.70770204	293	538.596667	0.08123227	0.081232267	0.08168327	0.081683274	0
wormd20121126s219HK104AF16rt23w01r12	0	HK104.134	HK104	23	11/26/12	12	37.76892653	293	547.773333	0.08503314	0.081232267	0.08587847	0.081683274	0
wormd20121126s219HK104AF16rt23w01r13	0	HK104.134	HK104	23	11/26/12	13	38.83015102	293	563.776667	0.09111475	0.081232267	0.09188523	0.081683274	0
wormd20121126s219HK104AF16rt23w01r14	0	HK104.134	HK104	23	11/26/12	14	39.89137551	293	580.593333	0.08967378	0.081232267	0.08974545	0.081683274	0
wormd20121126s219HK104AF16rt23w01r15	0	HK104.134	HK104	23	11/26/12	15	40.9526	293	595.253333	0.09502221	0.081232267	0.09630341	0.081683274	0
wormd20121126s219HK104AF16rt23w02r00	1	HK104.135	HK104	23	11/26/12	0	25.03423265	276	591.243816	0.59226671	0.083251202	0.69565639	0.093947972	1
wormd20121126s219HK104AF16rt23w02r01	1	HK104.135	HK104	23	11/26/12	1	26.09545714	200	638.424528	0.57972397	0.083251202	0.72680482	0.093947972	1
wormd20121126s219HK104AF16rt23w02r02	1	HK104.135	HK104	23	11/26/12	2	27.15668163	107	546.627737	0.48058543	0.083251202	0.65810247	0.093947972	1
wormd20121126s219HK104AF16rt23w02r03	1	HK104.135	HK104	23	11/26/12	3	28.21790612	126	605.710526	0.59513886	0.083251202	0.73961334	0.093947972	1
wormd20121126s219HK104AF16rt23w02r07	1	HK104.135	HK104	23	11/26/12	7	32.46280408	198	233.297561	0.16490126	0.083251202	0.21375362	0.093947972	1
wormd20121126s219HK104AF16rt23w02r08	1	HK104.135	HK104	23	11/26/12	8	33.52402857	201	157.149038	0.0832512	0.083251202	0.09751857	0.093947972	0
wormd20121126s219HK104AF16rt23w02r09	1	HK104.135	HK104	23	11/26/12	9	34.58525306	149	233.440994	0.1507333	0.083251202	0.15036033	0.093947972	1
wormd20121126s219HK104AF16rt23w02r10	1	HK104.135	HK104	23	11/26/12	10	35.64647755	293	549.453333	0.09684895	0.083251202	0.1226628	0.093947972	0
wormd20121126s219HK104AF16rt23w02r11	1	HK104.135	HK104	23	11/26/12	11	36.70770204	293	521.023333	0.09564383	0.083251202	0.09705728	0.093947972	0
wormd20121126s219HK104AF16rt23w02r12	1	HK104.135	HK104	23	11/26/12	12	37.76892653	293	529.846667	0.09344759	0.083251202	0.09514387	0.093947972	0
wormd20121126s219HK104AF16rt23w02r13	1	HK104.135	HK104	23	11/26/12	13	38.83015102	293	530.44	0.09396628	0.083251202	0.09469611	0.093947972	0
wormd20121126s219HK104AF16rt23w02r14	1	HK104.135	HK104	23	11/26/12	14	39.89137551	293	525.41	0.09864383	0.083251202	0.09888184	0.093947972	0
wormd20121126s219HK104AF16rt23w02r15	1	HK104.135	HK104	23	11/26/12	15	40.9526	293	519.593333	0.09178124	0.083251202	0.09394797	0.093947972	0
wormd20121126s219HK104AF16rt23w03r00	2	HK104.136	HK104	23	11/26/12	0	25.03423265	171	732.616601	0.51647599	0.078958948	0.56039098	0.079533838	1
wormd20121126s219HK104AF16rt23w03r01	2	HK104.136	HK104	23	11/26/12	1	26.09545714	179	714.658333	0.53618311	0.078958948	0.60584644	0.079533838	1
wormd20121126s219HK104AF16rt23w03r02	2	HK104.136	HK104	23	11/26/12	2	27.15668163	114	582.689474	0.36933091	0.078958948	0.44738438	0.079533838	1
wormd20121126s219HK104AF16rt23w03r04	2	HK104.136	HK104	23	11/26/12	4	29.27913061	128	710.039801	0.54351874	0.078958948	0.71794702	0.079533838	1
wormd20121126s219HK104AF16rt23w03r06	2	HK104.136	HK104	23	11/26/12	6	31.40157959	152	701.689655	0.4944102	0.078958948	0.68952737	0.079533838	1
wormd20121126s219HK104AF16rt23w03r08	2	HK104.136	HK104	23	11/26/12	8	33.52402857	183	677.906863	0.34596345	0.078958948	0.54696951	0.079533838	1
wormd20121126s219HK104AF16rt23w03r09	2	HK104.136	HK104	23	11/26/12	9	34.58525306	202	702.51938	0.37181344	0.078958948	0.52187704	0.079533838	1
wormd20121126s219HK104AF16rt23w03r10	2	HK104.136	HK104	23	11/26/12	10	35.64647755	293	755.453333	0.08039263	0.078958948	0.08086803	0.079533838	0
wormd20121126s219HK104AF16rt23w03r11	2	HK104.136	HK104	23	11/26/12	11	36.70770204	293	751.956667	0.08016411	0.078958948	0.08049125	0.079533838	0
wormd20121126s219HK104AF16rt23w03r12	2	HK104.136	HK104	23	11/26/12	12	37.76892653	293	746.083333	0.07895895	0.078958948	0.07953384	0.079533838	0
wormd20121126s219HK104AF16rt23w03r13	2	HK104.136	HK104	23	11/26/12	13	38.83015102	293	746.343333	0.0819992	0.078958948	0.08248373	0.079533838	0
wormd20121126s219HK104AF16rt23w03r14	2	HK104.136	HK104	23	11/26/12	14	39.89137551	293	750.98	0.07925579	0.078958948	0.07954578	0.079533838	0
wormd20121126s219HK104AF16rt23w03r15	2	HK104.136	HK104	23	11/26/12	15	40.9526	293	754.513333	0.08283307	0.078958948	0.08386018	0.079533838	0
wormd20121126s219HK104AF16rt23w07r00	6	HK104.137	HK104	23	11/26/12	0	25.03423265	216	321.506726	0.7482883	0.059022391	0.7738352	0.060597858	1
wormd20121126s219HK104AF16rt23w07r01	6	HK104.137	HK104	23	11/26/12	1	26.09545714	272	377.010753	0.74562672	0.059022391	0.83406002	0.060597858	1
wormd20121126s219HK104AF16rt23w07r02	6	HK104.137	HK104	23	11/26/12	2	27.15668163	233	305.700422	0.77345275	0.059022391	0.84941843	0.060597858	1
wormd20121126s219HK104AF16rt23w07r03	6	HK104.137	HK104	23	11/26/12	3	28.21790612	242	363.839357	0.65825968	0.059022391	0.80548812	0.060597858	1
wormd20121126s219HK104AF16rt23w07r04	6	HK104.137	HK104	23	11/26/12	4	29.27913061	260	380.520599	0.67852532	0.059022391	0.81349708	0.060597858	1
wormd20121126s219HK104AF16rt23w07r05	6	HK104.137	HK104	23	11/26/12	5	30.3403551	268	384.9631	0.69401943	0.059022391	0.81612708	0.060597858	1
wormd20121126s219HK104AF16rt23w07r07	6	HK104.137	HK104	23	11/26/12	7	32.46280408	275	359.510638	0.54701636	0.059022391	0.76850775	0.060597858	1
wormd20121126s219HK104AF16rt23w07r08	6	HK104.137	HK104	23	11/26/12	8	33.52402857	182	364.174603	0.58968244	0.059022391	0.75404942	0.060597858	1
wormd20121126s219HK104AF16rt23w07r09	6	HK104.137	HK104	23	11/26/12	9	34.58525306	293	294.966667	0.07450659	0.059022391	0.1072217	0.060597858	0
wormd20121126s219HK104AF16rt23w07r10	6	HK104.137	HK104	23	11/26/12	10	35.64647755	293	289.4	0.09477479	0.059022391	0.26572171	0.060597858	1
wormd20121126s219HK104AF16rt23w07r11	6	HK104.137	HK104	23	11/26/12	11	36.70770204	293	287.333333	0.08348624	0.059022391	0.16481198	0.060597858	1
wormd20121126s219HK104AF16rt23w07r12	6	HK104.137	HK104	23	11/26/12	12	37.76892653	293	280.356667	0.07860847	0.059022391	0.08450907	0.060597858	0
wormd20121126s219HK104AF16rt23w07r13	6	HK104.137	HK104	23	11/26/12	13	38.83015102	293	284.343333	0.07451549	0.059022391	0.07605562	0.060597858	0
wormd20121126s219HK104AF16rt23w07r14	6	HK104.137	HK104	23	11/26/12	14	39.89137551	293	292.463333	0.05902239	0.059022391	0.06059786	0.060597858	0
wormd20121126s219HK104AF16rt23w07r15	6	HK104.137	HK104	23	11/26/12	15	40.9526	293	314.443333	0.06642075	0.059022391	0.06793404	0.060597858	0
wormd20121126s219HK104AF16rt23w08r00	7	HK104.138	HK104	23	11/26/12	0	25.03423265	285	550.421233	0.59722279	0.073133981	0.64021889	0.075589732	1
wormd20121126s219HK104AF16rt23w08r01	7	HK104.138	HK104	23	11/26/12	1	26.09545714	206	507.492958	0.56437088	0.073133981	0.65151581	0.075589732	1
wormd20121126s219HK104AF16rt23w08r02	7	HK104.138	HK104	23	11/26/12	2	27.15668163	102	476.35514	0.53536436	0.073133981	0.62956045	0.075589732	1
wormd20121126s219HK104AF16rt23w08r03	7	HK104.138	HK104	23	11/26/12	3	28.21790612	181	556.229592	0.54415462	0.073133981	0.70297355	0.075589732	1
wormd20121126s219HK104AF16rt23w08r04	7	HK104.138	HK104	23	11/26/12	4	29.27913061	243	543.192	0.53767526	0.073133981	0.71597303	0.075589732	1
wormd20121126s219HK104AF16rt23w08r05	7	HK104.138	HK104	23	11/26/12	5	30.3403551	225	531.715517	0.59874912	0.073133981	0.74536467	0.075589732	1
wormd20121126s219HK104AF16rt23w08r06	7	HK104.138	HK104	23	11/26/12	6	31.40157959	278	548.821053	0.57128295	0.073133981	0.69401839	0.075589732	1
wormd20121126s219HK104AF16rt23w08r07	7	HK104.138	HK104	23	11/26/12	7	32.46280408	226	528.682403	0.35253743	0.073133981	0.60853872	0.075589732	1
wormd20121126s219HK104AF16rt23w08r08	7	HK104.138	HK104	23	11/26/12	8	33.52402857	225	544.12931	0.52292216	0.073133981	0.61476742	0.075589732	1
wormd20121126s219HK104AF16rt23w08r09	7	HK104.138	HK104	23	11/26/12	9	34.58525306	293	540.673333	0.53705979	0.073133981	0.57344153	0.075589732	1
wormd20121126s219HK104AF16rt23w08r10	7	HK104.138	HK104	23	11/26/12	10	35.64647755	289	552.510135	0.2173264	0.073133981	0.55667627	0.075589732	1
wormd20121126s219HK104AF16rt23w08r11	7	HK104.138	HK104	23	11/26/12	11	36.70770204	293	553.376667	0.09740961	0.073133981	0.09786512	0.075589732	0
wormd20121126s219HK104AF16rt23w08r12	7	HK104.138	HK104	23	11/26/12	12	37.76892653	293	529.343333	0.09733579	0.073133981	0.09890337	0.075589732	0
wormd20121126s219HK104AF16rt23w08r13	7	HK104.138	HK104	23	11/26/12	13	38.83015102	293	533.113333	0.09741643	0.073133981	0.09706772	0.075589732	0
wormd20121126s219HK104AF16rt23w08r14	7	HK104.138	HK104	23	11/26/12	14	39.89137551	293	544.94	0.09361048	0.073133981	0.093835	0.075589732	0
wormd20121126s219HK104AF16rt23w08r15	7	HK104.138	HK104	23	11/26/12	15	40.9526	293	466.146667	0.07313398	0.073133981	0.07558973	0.075589732	0
wormd20121126s219HK104AF16rt23w09r00	8	HK104.139	HK104	23	11/26/12	0	25.03423265	268	581.685185	0.52321471	0.084417345	0.65061096	0.085974356	1
wormd20121126s219HK104AF16rt23w09r01	8	HK104.139	HK104	23	11/26/12	1	26.09545714	107	580.816667	0.54516169	0.084417345	0.70739848	0.085974356	1
wormd20121126s219HK104AF16rt23w09r03	8	HK104.139	HK104	23	11/26/12	3	28.21790612	112	523.125	0.49668095	0.084417345	0.68560913	0.085974356	1
wormd20121126s219HK104AF16rt23w09r05	8	HK104.139	HK104	23	11/26/12	5	30.3403551	234	547.894737	0.57121882	0.084417345	0.77282531	0.085974356	1
wormd20121126s219HK104AF16rt23w09r06	8	HK104.139	HK104	23	11/26/12	6	31.40157959	161	605.561404	0.50576148	0.084417345	0.72367764	0.085974356	1
wormd20121126s219HK104AF16rt23w09r07	8	HK104.139	HK104	23	11/26/12	7	32.46280408	285	537.989726	0.50027517	0.084417345	0.6756133	0.085974356	1
wormd20121126s219HK104AF16rt23w09r08	8	HK104.139	HK104	23	11/26/12	8	33.52402857	293	539.256667	0.28354033	0.084417345	0.58911122	0.085974356	1
wormd20121126s219HK104AF16rt23w09r09	8	HK104.139	HK104	23	11/26/12	9	34.58525306	250	566.849206	0.08750918	0.084417345	0.09050818	0.085974356	0
wormd20121126s219HK104AF16rt23w09r10	8	HK104.139	HK104	23	11/26/12	10	35.64647755	293	567.066667	0.08715316	0.084417345	0.09095924	0.085974356	0
wormd20121126s219HK104AF16rt23w09r11	8	HK104.139	HK104	23	11/26/12	11	36.70770204	293	562.503333	0.0877607	0.084417345	0.08891859	0.085974356	0
wormd20121126s219HK104AF16rt23w09r12	8	HK104.139	HK104	23	11/26/12	12	37.76892653	293	546.756667	0.08757133	0.084417345	0.08832281	0.085974356	0
wormd20121126s219HK104AF16rt23w09r13	8	HK104.139	HK104	23	11/26/12	13	38.83015102	293	503.633333	0.08441735	0.084417345	0.08597436	0.085974356	0
wormd20121126s219HK104AF16rt23w13r00	12	HK104.140	HK104	23	11/26/12	0	25.03423265	212	272.342466	0.76930304	0.069096894	0.78809997	0.069883291	1
wormd20121126s219HK104AF16rt23w13r01	12	HK104.140	HK104	23	11/26/12	1	26.09545714	263	291.462963	0.76526211	0.069096894	0.81593595	0.069883291	1
wormd20121126s219HK104AF16rt23w13r02	12	HK104.140	HK104	23	11/26/12	2	27.15668163	203	316.180952	0.70413012	0.069096894	0.75942396	0.069883291	1
wormd20121126s219HK104AF16rt23w13r03	12	HK104.140	HK104	23	11/26/12	3	28.21790612	236	307.008264	0.73788963	0.069096894	0.83608374	0.069883291	1
wormd20121126s219HK104AF16rt23w13r04	12	HK104.140	HK104	23	11/26/12	4	29.27913061	172	317.832402	0.62405533	0.069096894	0.76797753	0.069883291	1
wormd20121126s219HK104AF16rt23w13r05	12	HK104.140	HK104	23	11/26/12	5	30.3403551	221	306.371681	0.72065539	0.069096894	0.86240556	0.069883291	1
wormd20121126s219HK104AF16rt23w13r06	12	HK104.140	HK104	23	11/26/12	6	31.40157959	254	300.961538	0.49745485	0.069096894	0.78645204	0.069883291	1
wormd20121126s219HK104AF16rt23w13r07	12	HK104.140	HK104	23	11/26/12	7	32.46280408	237	298.586777	0.49580191	0.069096894	0.76928625	0.069883291	1
wormd20121126s219HK104AF16rt23w13r08	12	HK104.140	HK104	23	11/26/12	8	33.52402857	175	284.916667	0.64040309	0.069096894	0.70522469	0.069883291	1
wormd20121126s219HK104AF16rt23w13r09	12	HK104.140	HK104	23	11/26/12	9	34.58525306	290	269.754209	0.08742961	0.069096894	0.09005297	0.069883291	0
wormd20121126s219HK104AF16rt23w13r10	12	HK104.140	HK104	23	11/26/12	10	35.64647755	293	351.376667	0.09911735	0.069096894	0.30883386	0.069883291	1
wormd20121126s219HK104AF16rt23w13r11	12	HK104.140	HK104	23	11/26/12	11	36.70770204	293	339.81	0.06909689	0.069096894	0.06988329	0.069883291	0
wormd20121126s219HK104AF16rt23w13r12	12	HK104.140	HK104	23	11/26/12	12	37.76892653	293	333.553333	0.07004374	0.069096894	0.07020756	0.069883291	0
wormd20121126s219HK104AF16rt23w13r13	12	HK104.140	HK104	23	11/26/12	13	38.83015102	293	331.653333	0.07672414	0.069096894	0.07877013	0.069883291	0
wormd20121126s219HK104AF16rt23w13r14	12	HK104.140	HK104	23	11/26/12	14	39.89137551	293	318.283333	0.07438963	0.069096894	0.07500393	0.069883291	0
wormd20121126s219HK104AF16rt23w13r15	12	HK104.140	HK104	23	11/26/12	15	40.9526	293	317.63	0.0738026	0.069096894	0.07570194	0.069883291	0
wormd20121126s219HK104AF16rt23w14r00	13	HK104.141	HK104	23	11/26/12	0	25.03423265	268	432.945455	0.61952158	0.072217265	0.74817816	0.073308812	1
wormd20121126s219HK104AF16rt23w14r01	13	HK104.141	HK104	23	11/26/12	1	26.09545714	201	445.201923	0.65922569	0.072217265	0.80272282	0.073308812	1
wormd20121126s219HK104AF16rt23w14r02	13	HK104.141	HK104	23	11/26/12	2	27.15668163	153	480.700637	0.60784896	0.072217265	0.74866081	0.073308812	1
wormd20121126s219HK104AF16rt23w14r03	13	HK104.141	HK104	23	11/26/12	3	28.21790612	226	437.770563	0.66631286	0.072217265	0.79476927	0.073308812	1
wormd20121126s219HK104AF16rt23w14r05	13	HK104.141	HK104	23	11/26/12	5	30.3403551	217	480.009009	0.67483856	0.072217265	0.79994699	0.073308812	1
wormd20121126s219HK104AF16rt23w14r07	13	HK104.141	HK104	23	11/26/12	7	32.46280408	116	365.891667	0.43395237	0.072217265	0.62682414	0.073308812	1
wormd20121126s219HK104AF16rt23w14r09	13	HK104.141	HK104	23	11/26/12	9	34.58525306	293	531.34	0.07221727	0.072217265	0.07330881	0.073308812	0
wormd20121126s219HK104AF16rt23w14r10	13	HK104.141	HK104	23	11/26/12	10	35.64647755	293	506.916667	0.09763021	0.072217265	0.25290504	0.073308812	1
wormd20121126s219HK104AF16rt23w14r11	13	HK104.141	HK104	23	11/26/12	11	36.70770204	293	424.29	0.0910576	0.072217265	0.1301722	0.073308812	0
wormd20121126s219HK104AF16rt23w14r12	13	HK104.141	HK104	23	11/26/12	12	37.76892653	293	404.406667	0.09248222	0.072217265	0.09526622	0.073308812	0
wormd20121126s219HK104AF16rt23w14r13	13	HK104.141	HK104	23	11/26/12	13	38.83015102	293	414.953333	0.09808198	0.072217265	0.09928467	0.073308812	0
wormd20121126s219HK104AF16rt23w14r14	13	HK104.141	HK104	23	11/26/12	14	39.89137551	293	431.263333	0.08993263	0.072217265	0.09012431	0.073308812	0
wormd20121126s219HK104AF16rt23w14r15	13	HK104.141	HK104	23	11/26/12	15	40.9526	293	452.716667	0.0875265	0.072217265	0.08844535	0.073308812	0
wormd20121126s219HK104AF16rt23w15r00	14	HK104.142	HK104	23	11/26/12	0	25.03423265	159	429.228916	0.58075456	0.069697896	0.6641624	0.071071656	1
wormd20121126s219HK104AF16rt23w15r02	14	HK104.142	HK104	23	11/26/12	2	27.15668163	126	490.044118	0.64649109	0.069697896	0.78707853	0.071071656	1
wormd20121126s219HK104AF16rt23w15r03	14	HK104.142	HK104	23	11/26/12	3	28.21790612	159	454.423313	0.59477183	0.069697896	0.78370637	0.071071656	1
wormd20121126s219HK104AF16rt23w15r04	14	HK104.142	HK104	23	11/26/12	4	29.27913061	143	455.593333	0.59648784	0.069697896	0.75982855	0.071071656	1
wormd20121126s219HK104AF16rt23w15r05	14	HK104.142	HK104	23	11/26/12	5	30.3403551	201	465.29902	0.72362249	0.069697896	0.84721969	0.071071656	1
wormd20121126s219HK104AF16rt23w15r06	14	HK104.142	HK104	23	11/26/12	6	31.40157959	212	451.869955	0.59001531	0.069697896	0.79532744	0.071071656	1
wormd20121126s219HK104AF16rt23w15r07	14	HK104.142	HK104	23	11/26/12	7	32.46280408	191	422.373832	0.66281281	0.069697896	0.79361182	0.071071656	1
wormd20121126s219HK104AF16rt23w15r08	14	HK104.142	HK104	23	11/26/12	8	33.52402857	235	424.46371	0.3668579	0.069697896	0.66682912	0.071071656	1
wormd20121126s219HK104AF16rt23w15r09	14	HK104.142	HK104	23	11/26/12	9	34.58525306	277	476.349481	0.38551326	0.069697896	0.65951973	0.071071656	1
wormd20121126s219HK104AF16rt23w15r10	14	HK104.142	HK104	23	11/26/12	10	35.64647755	293	399.01	0.08109579	0.069697896	0.08183657	0.071071656	0
wormd20121126s219HK104AF16rt23w15r11	14	HK104.142	HK104	23	11/26/12	11	36.70770204	293	410.99	0.08489099	0.069697896	0.10220884	0.071071656	0
wormd20121126s219HK104AF16rt23w15r12	14	HK104.142	HK104	23	11/26/12	12	37.76892653	293	431.79	0.0734821	0.069697896	0.07491638	0.071071656	0
wormd20121126s219HK104AF16rt23w15r13	14	HK104.142	HK104	23	11/26/12	13	38.83015102	293	438.12	0.07683605	0.069697896	0.0782463	0.071071656	0
wormd20121126s219HK104AF16rt23w15r14	14	HK104.142	HK104	23	11/26/12	14	39.89137551	293	432.506667	0.0696979	0.069697896	0.07107166	0.071071656	0
wormd20121126s219HK104AF16rt23w15r15	14	HK104.142	HK104	23	11/26/12	15	40.9526	293	441.013333	0.07337971	0.069697896	0.07363303	0.071071656	0
wormd20121129s269HK104PB1162rt23w01r00	0	HK104.143	HK104	23	11/29/12	0	25.03423265	293	367.366667	0.53531548	0.082565052	0.68524348	0.082919517	1
wormd20121129s269HK104PB1162rt23w01r03	0	HK104.143	HK104	23	11/29/12	3	28.21790612	188	225.041237	0.40656636	0.082565052	0.52274734	0.082919517	1
wormd20121129s269HK104PB1162rt23w01r06	0	HK104.143	HK104	23	11/29/12	6	31.40157959	290	394.218855	0.36171083	0.082565052	0.63843269	0.082919517	1
wormd20121129s269HK104PB1162rt23w01r07	0	HK104.143	HK104	23	11/29/12	7	32.46280408	182	388.740541	0.56443565	0.082565052	0.70975956	0.082919517	1
wormd20121129s269HK104PB1162rt23w01r08	0	HK104.143	HK104	23	11/29/12	8	33.52402857	132	370.955975	0.60072527	0.082565052	0.71854912	0.082919517	1
wormd20121129s269HK104PB1162rt23w01r09	0	HK104.143	HK104	23	11/29/12	9	34.58525306	293	291.76	0.0931878	0.082565052	0.09507282	0.082919517	0
[truncated: 96,883 more rows]
